# Supplementary material for: Identification of a Dual Autophagy and REV-ERB Inhibitor with in Vivo Anticancer Efficacy
Source: PubMed Central journal article supplement — J Med Chem. 2023 Dec 20;67(1):349–79. doi: 10.1021/acs.jmedchem.3c01432 (PMC10788905; doi:10.1021/acs.jmedchem.3c01432), 2023-12-20
Supplement: jm3c01432_si_001.pdf [file jm3c01432_si_001.pdf]

## Supporting Information

### Identification of a Dual Autophagy and REV-ERB Inhibitor with in Vivo Anticancer Efficacy

*Martina Palomba,<sup>a,¥,‡</sup> Donatella Vecchio,<sup>a,¥,‡</sup> Giulia Allavena,<sup>a,¥</sup> Vito Capaccio,<sup>a,¥</sup> Claudia De Mei,<sup>a,°,†</sup> Rita Scarpelli,<sup>a,§\*</sup> and Benedetto Grimaldi<sup>a,¥\*</sup>*

<sup>a</sup>Fondazione Istituto Italiano di Tecnologia, <sup>¥</sup>Molecular Medicine, <sup>§</sup>Medicinal Chemistry and Technologies for Drug Discovery and Delivery Facility, <sup>°</sup>Nanomaterials for Biomedical Applications, <sup>†</sup>Nanotechnology for Precision Medicine, Via Morego 30, I-16163 Genova, Italy

\*Corresponding author:

benedetto.grimaldi@iit.it

rita.scarpelli@iit.it

#### Contents of Supporting Information:

|                                                                           |     |
|---------------------------------------------------------------------------|-----|
| <sup>1</sup> H NMR and <sup>13</sup> C NMR spectra of the final compounds | S2  |
| UPLC traces of the final compounds                                        | S26 |
| <b>Table S1</b>                                                           | S50 |
| <b>Figure S1</b>                                                          | S51 |
| <b>Figure S2</b>                                                          | S52 |
| <b>Figure S3</b>                                                          | S53 |

Compound 3:  $^1\text{H}$  NMR (400 MHz,  $\text{DMSO-}d_6$ ) and  $^{13}\text{C}$  NMR (151 MHz,  $\text{DMSO-}d_6$ )

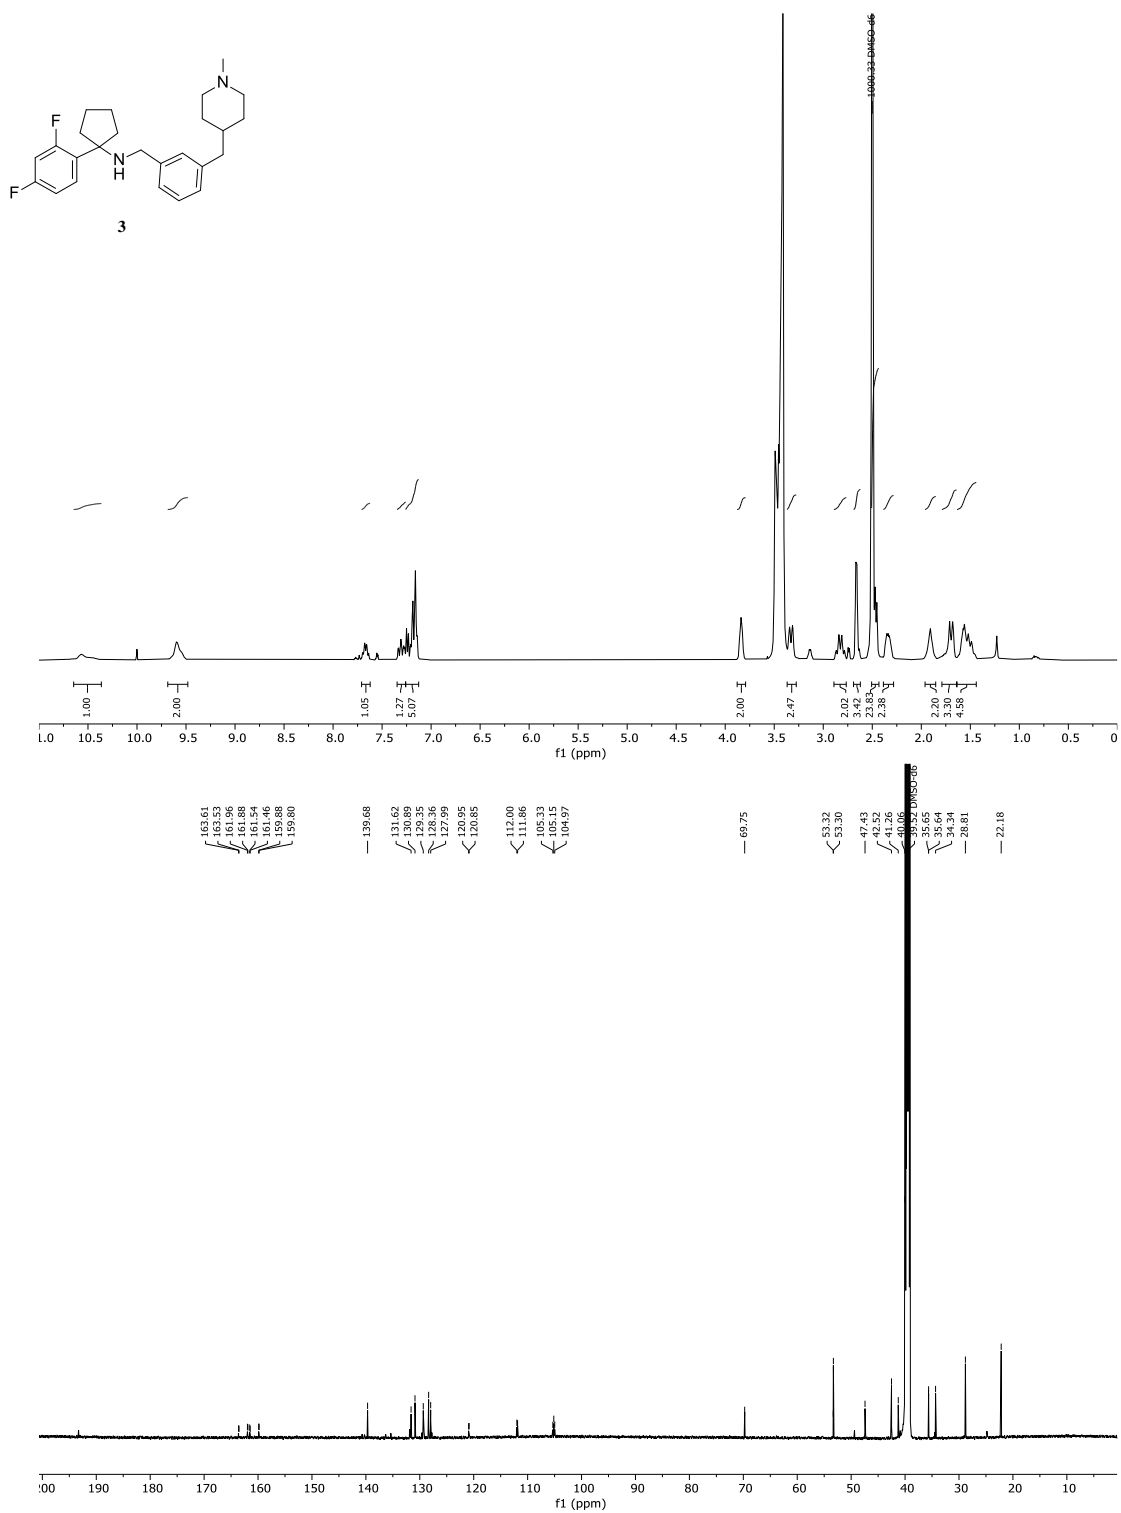



Compound **5**:  $^1\text{H}$  NMR (400 MHz,  $\text{DMSO-}d_6$ ) and  $^{13}\text{C}$  NMR (101 MHz,  $\text{DMSO-}d_6$ )

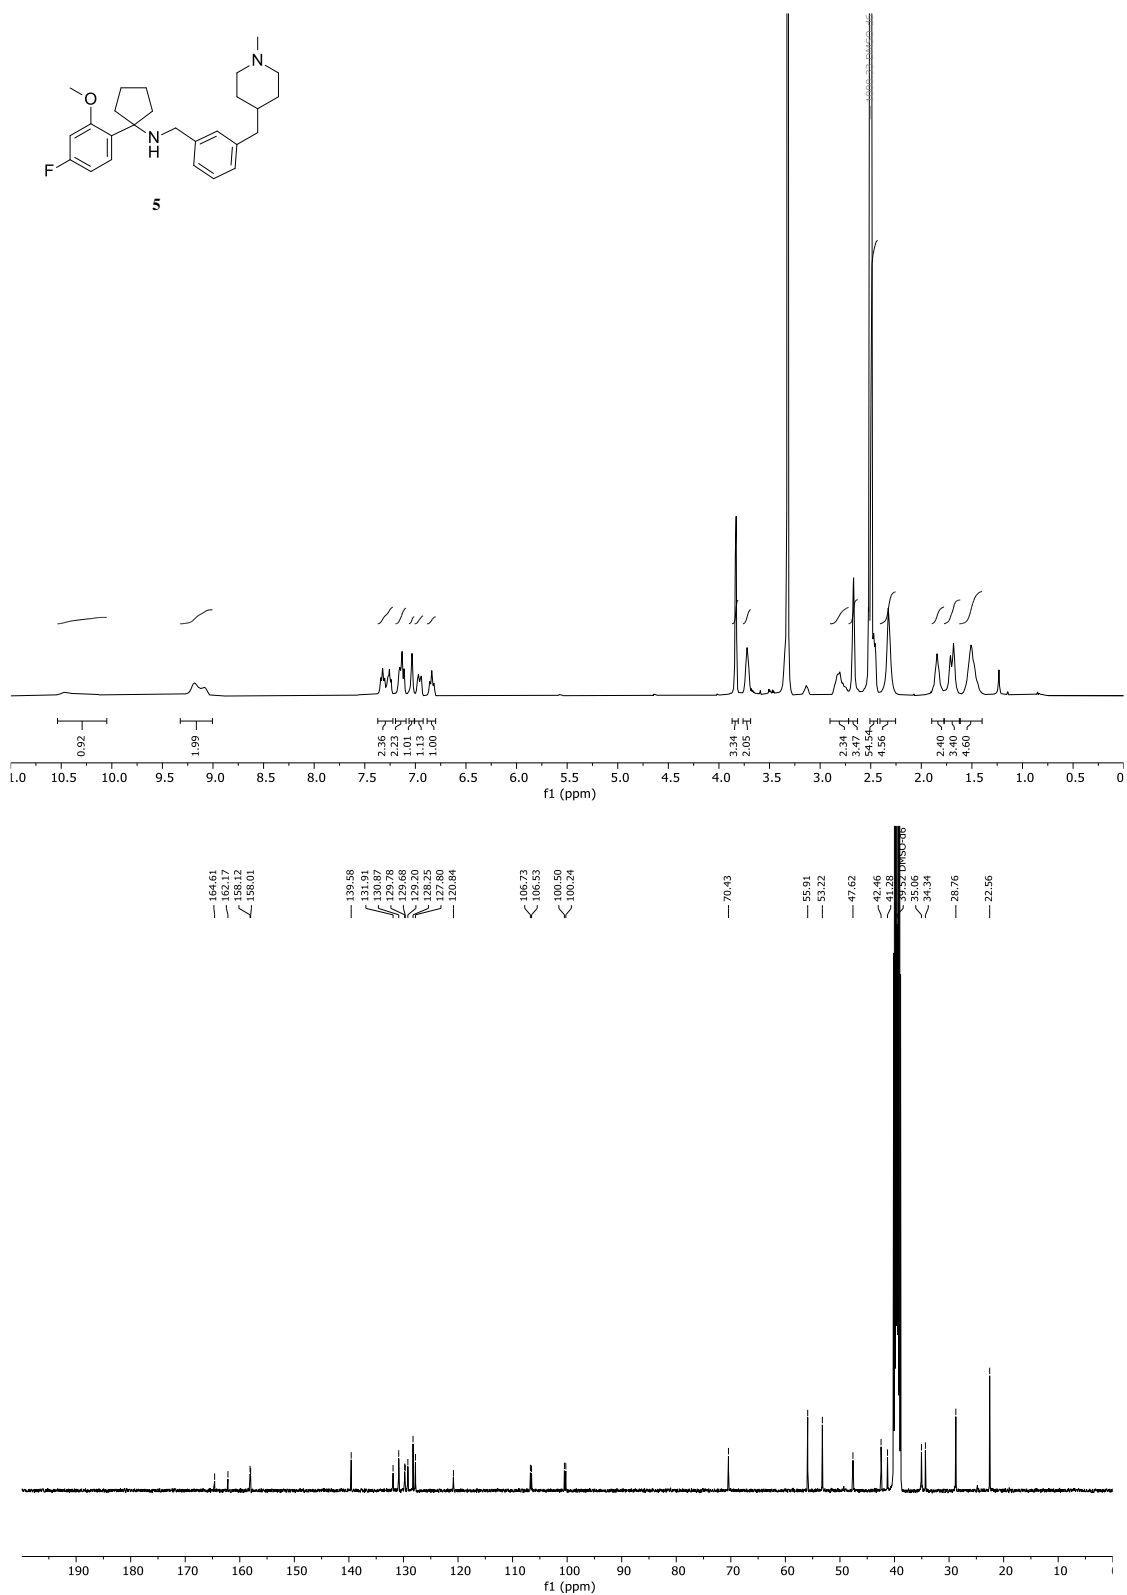

Compound **6**:  $^1\text{H}$  NMR (400 MHz,  $\text{DMSO-}d_6$ ) and  $^{13}\text{C}$  NMR (101 MHz,  $\text{DMSO-}d_6$ )

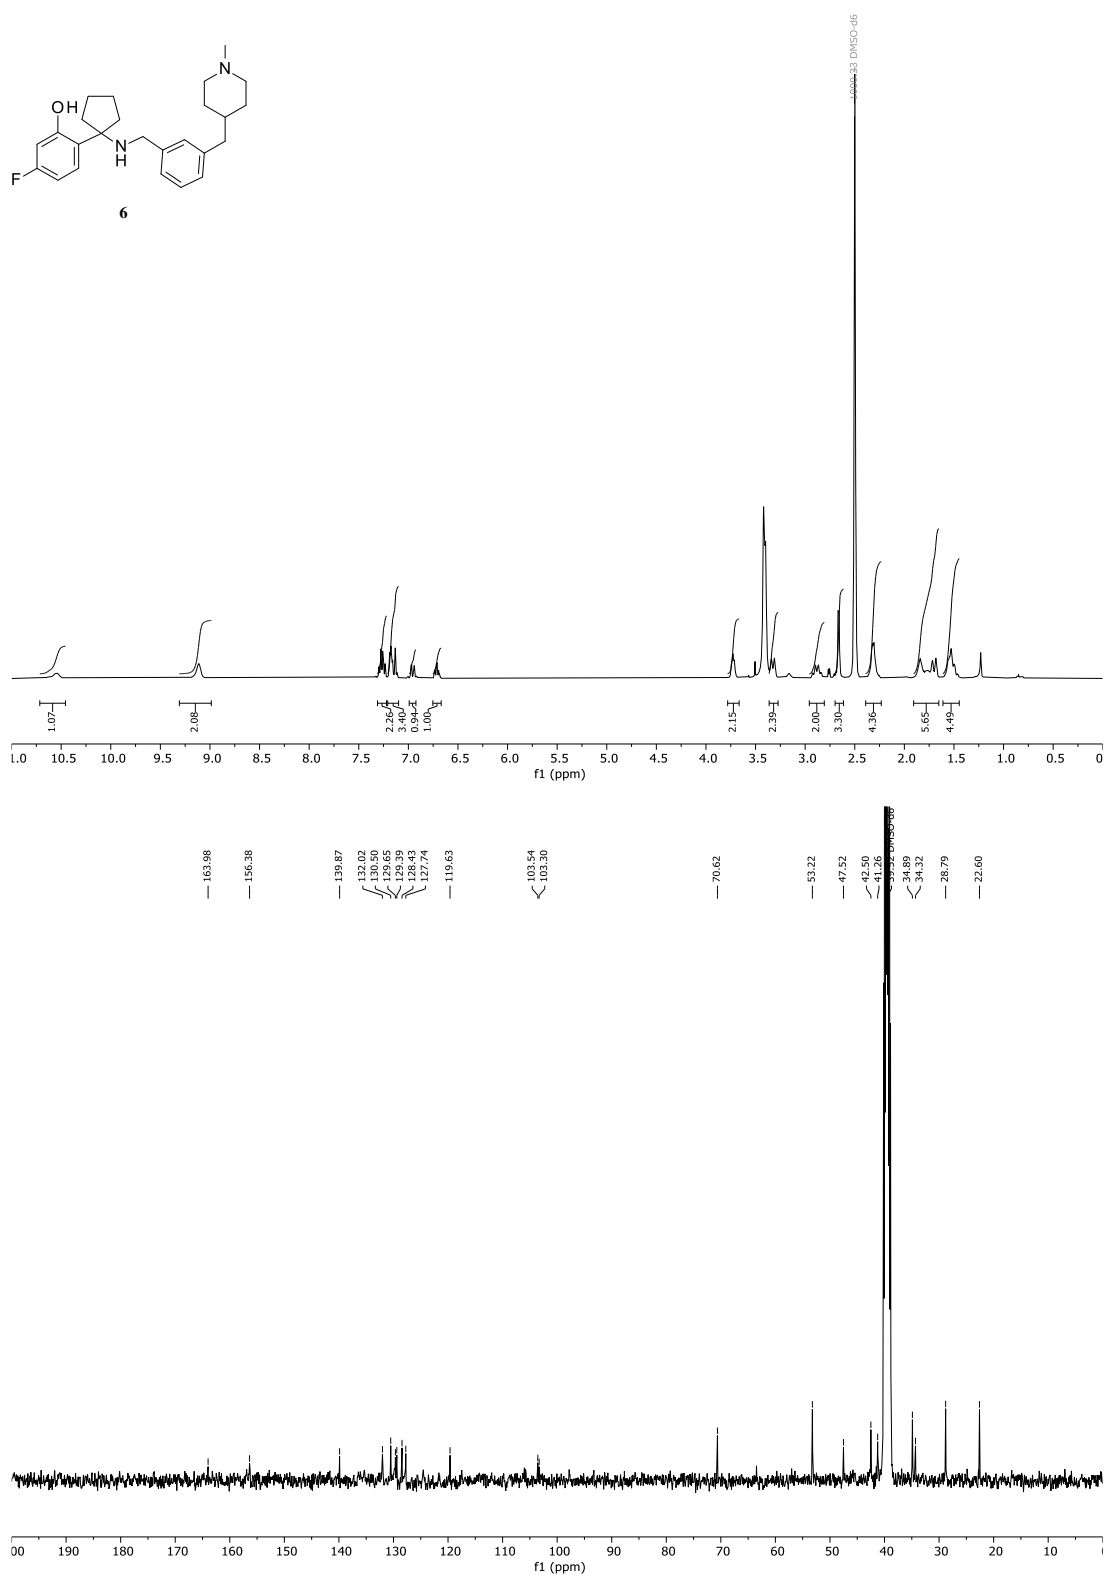

Compound 7:  $^1\text{H}$  NMR (400 MHz,  $\text{DMSO-}d_6$ ) and  $^{13}\text{C}$  NMR (101 MHz,  $\text{DMSO-}d_6$ )

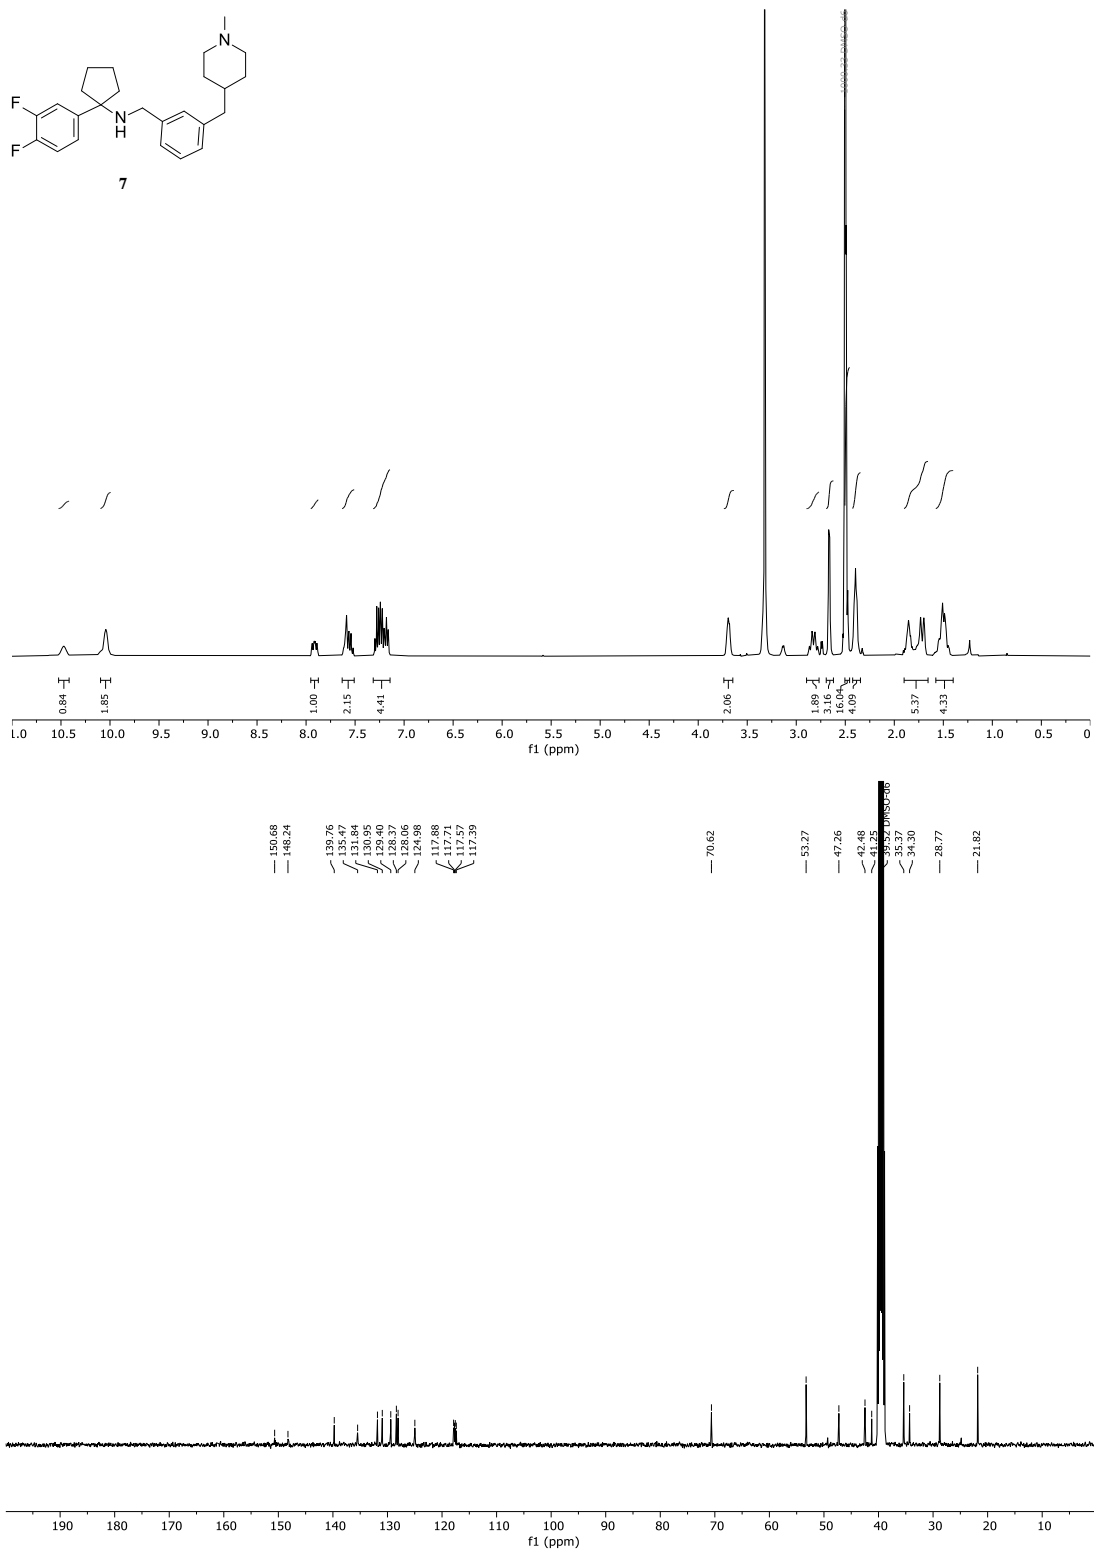

Compound **8**:  $^1\text{H}$  NMR (400 MHz,  $\text{DMSO-}d_6$ ) and  $^{13}\text{C}$  NMR (101 MHz,  $\text{DMSO-}d_6$ )

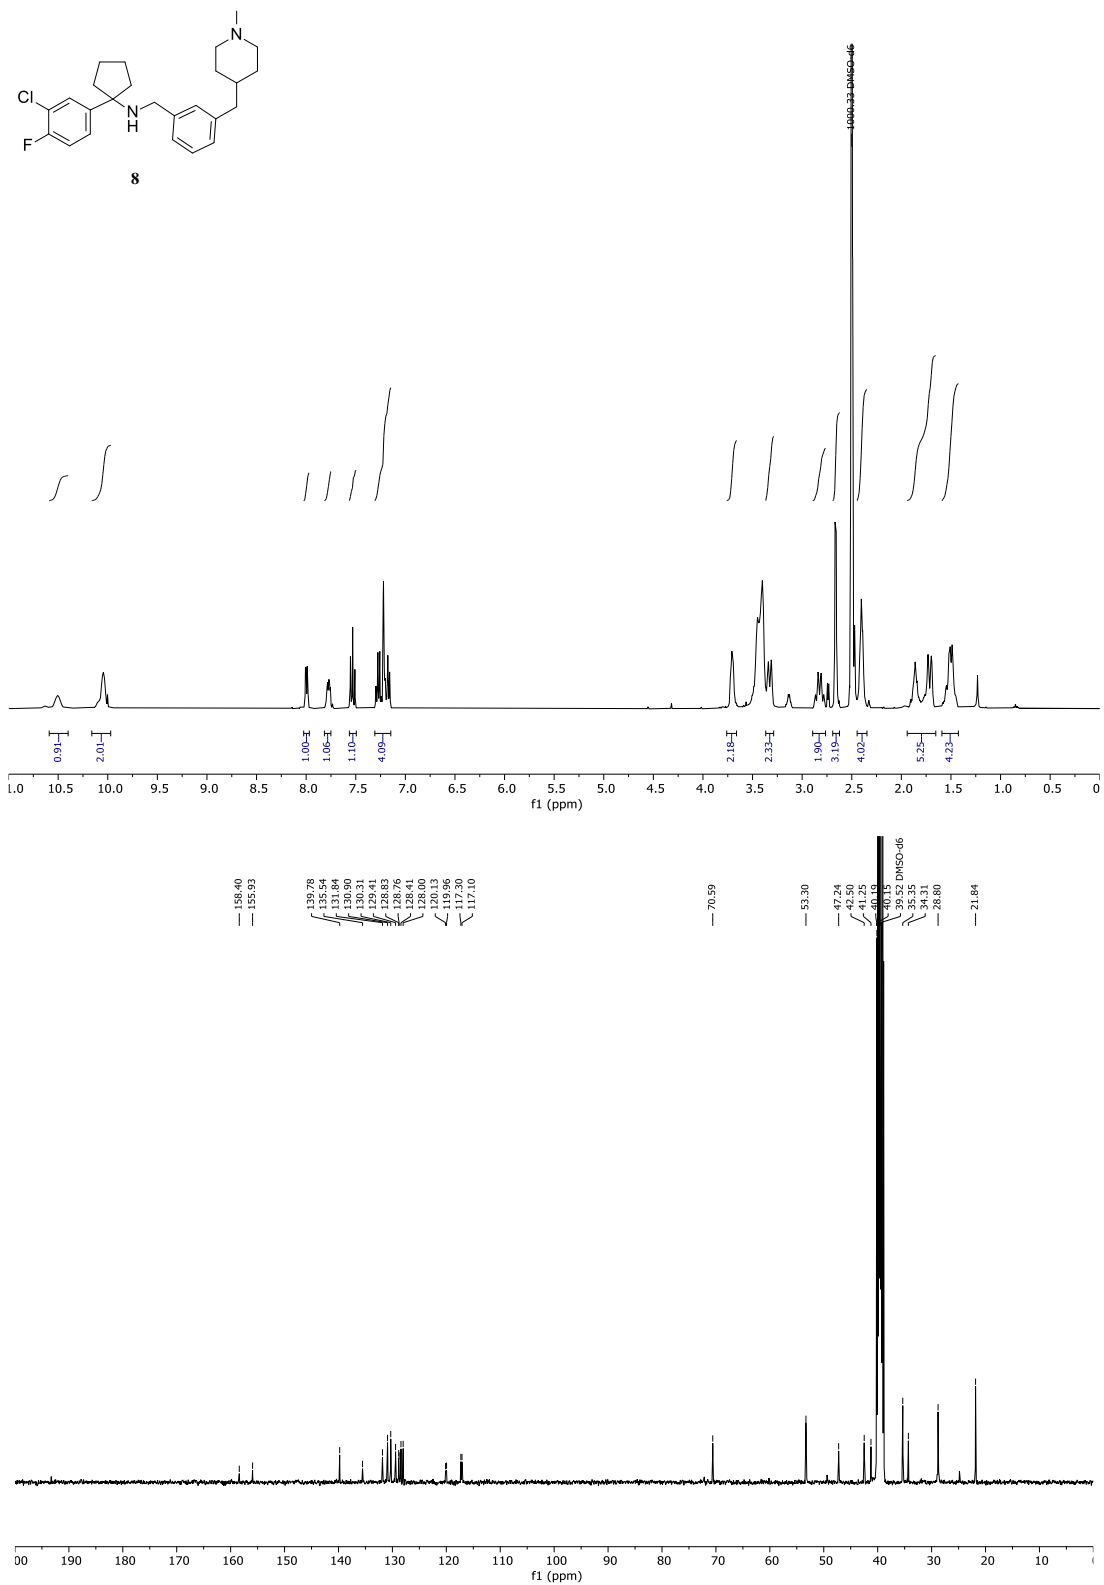

Compound **9**:  $^1\text{H}$  NMR (400 MHz,  $\text{DMSO-}d_6$ ) and  $^{13}\text{C}$  NMR (101 MHz,  $\text{DMSO-}d_6$ )

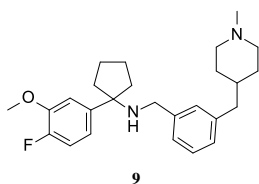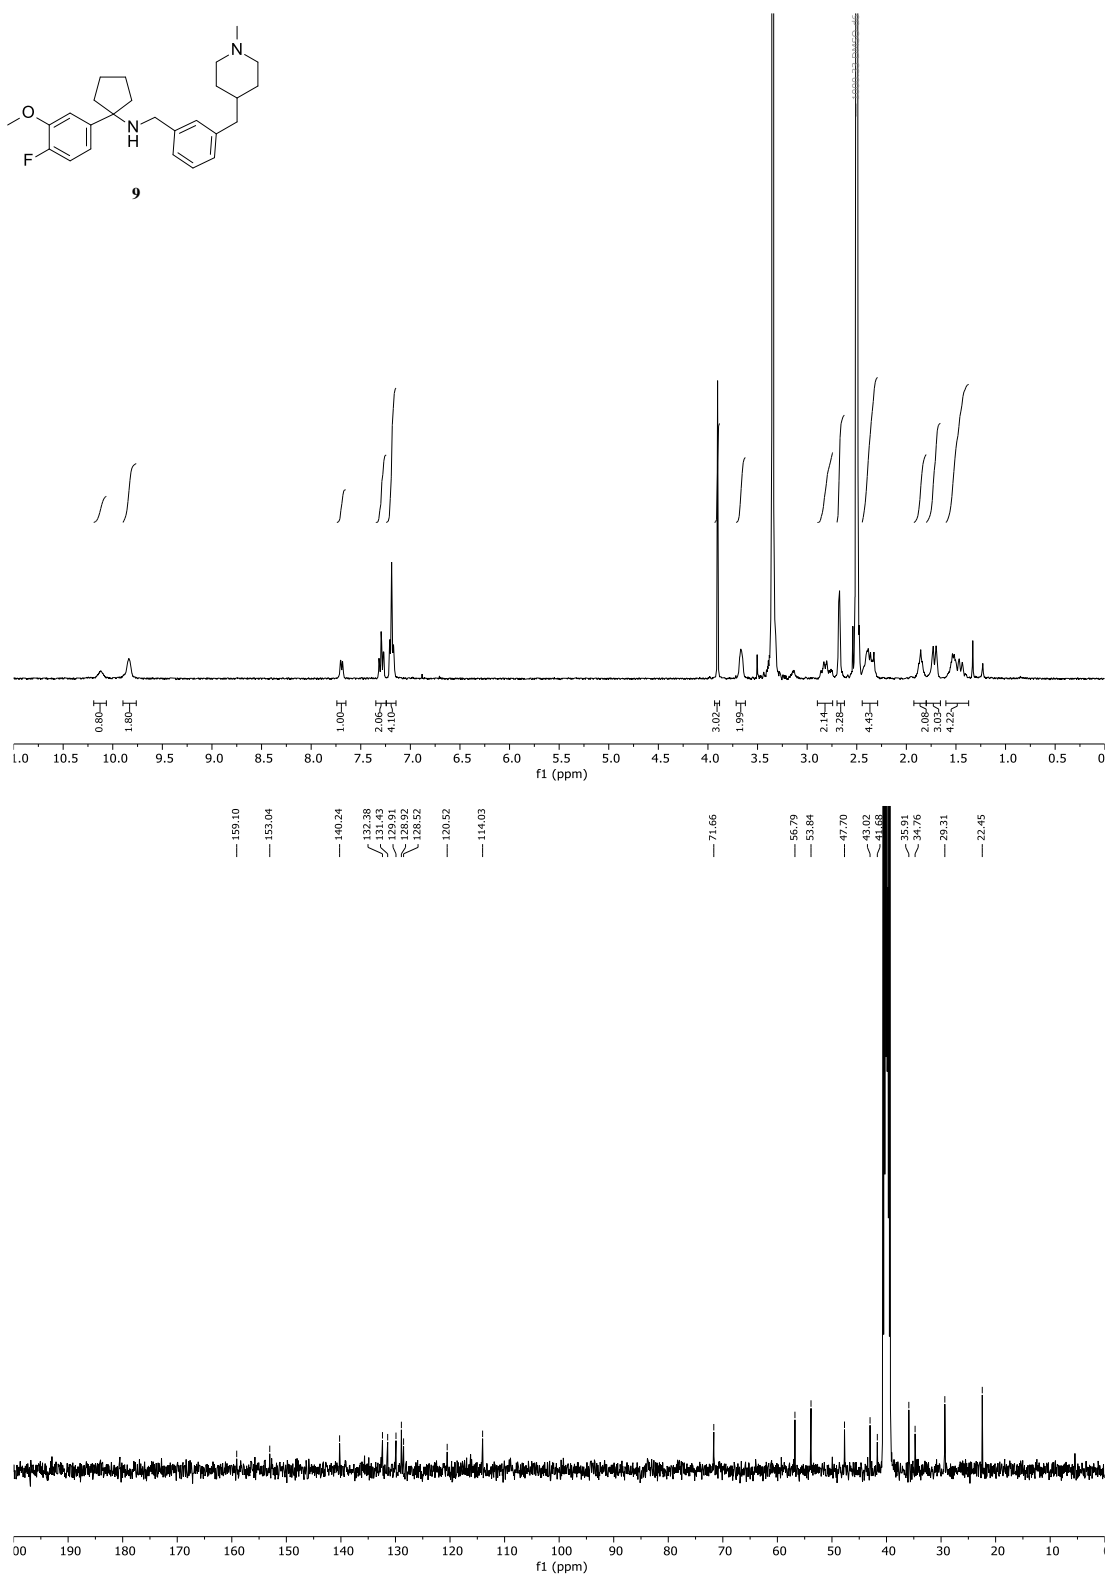



Compound **10**:  $^1\text{H}$  NMR (400 MHz,  $\text{DMSO-}d_6$ ) and  $^{13}\text{C}$  NMR (101 MHz,  $\text{DMSO-}d_6$ )

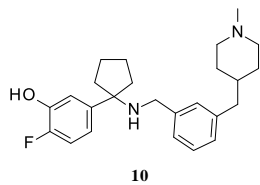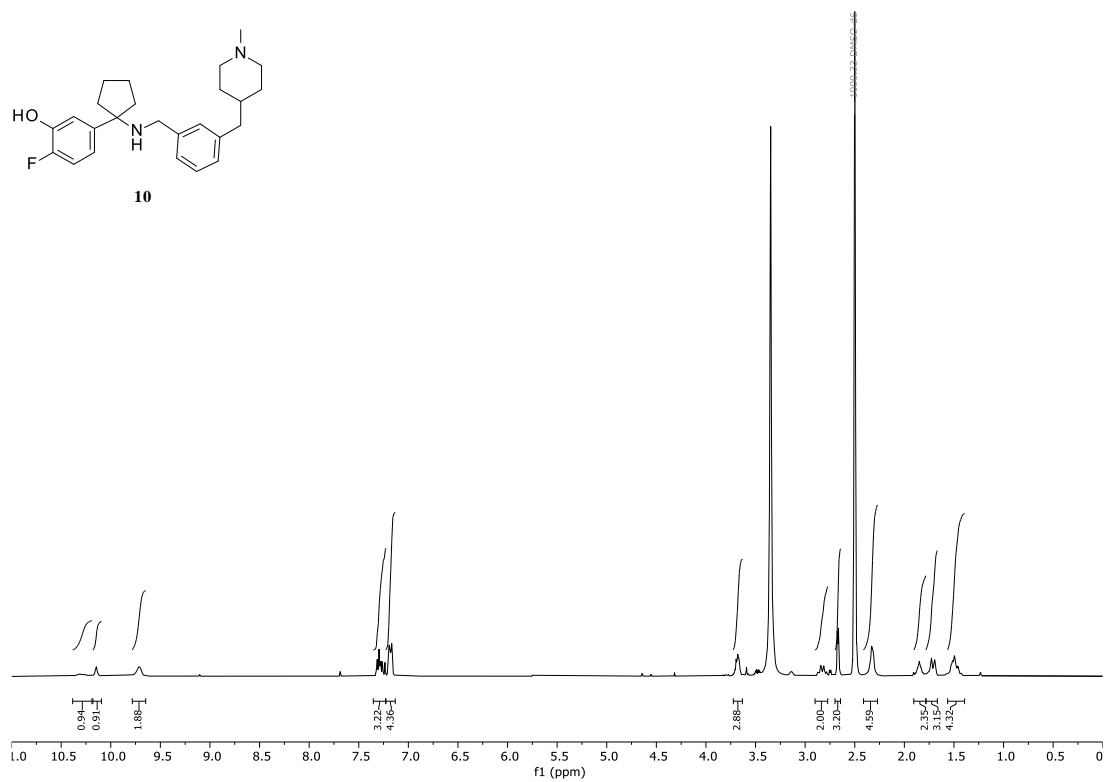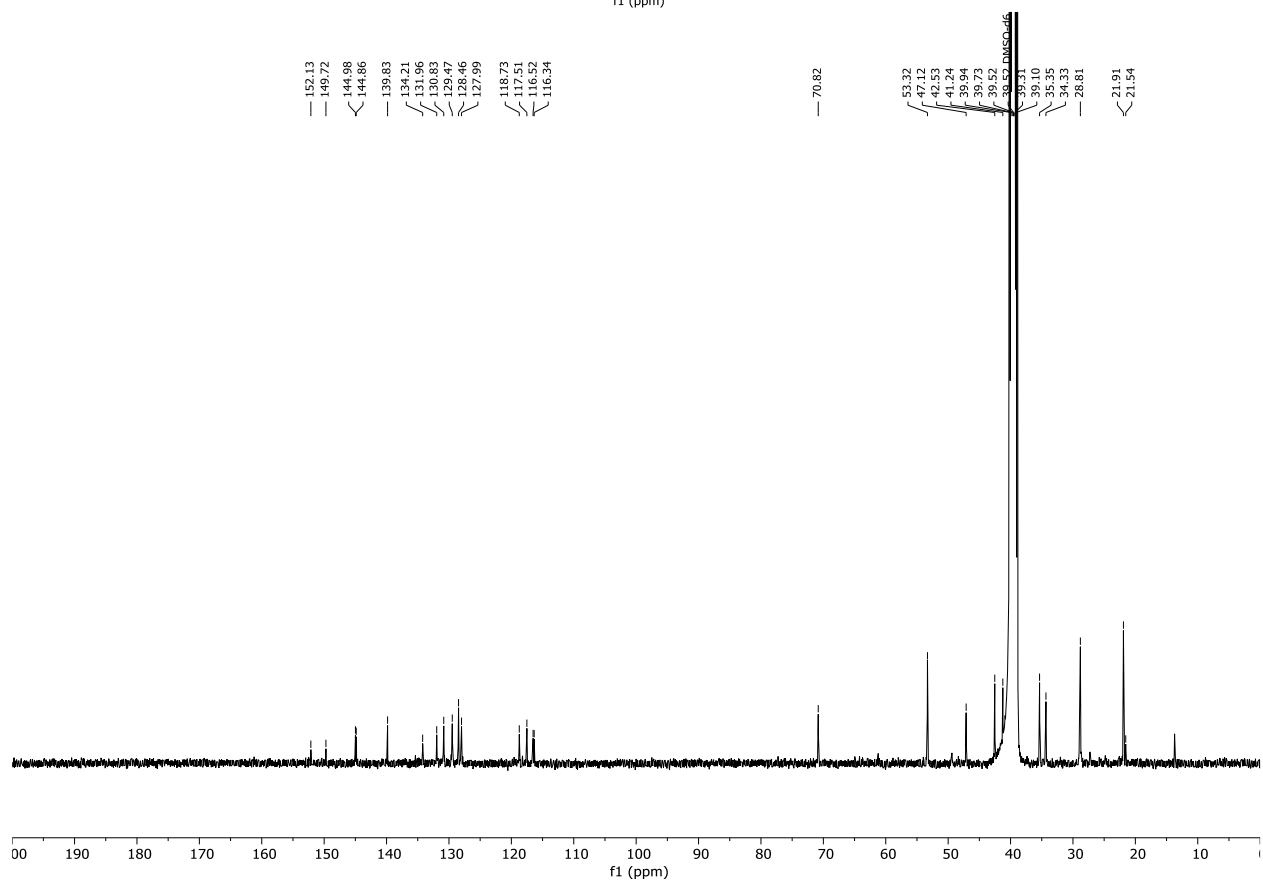

Compound **11**:  $^1\text{H}$  NMR (400 MHz,  $\text{DMSO-}d_6$ ) and  $^{13}\text{C}$  NMR (151 MHz,  $\text{DMSO-}d_6$ )

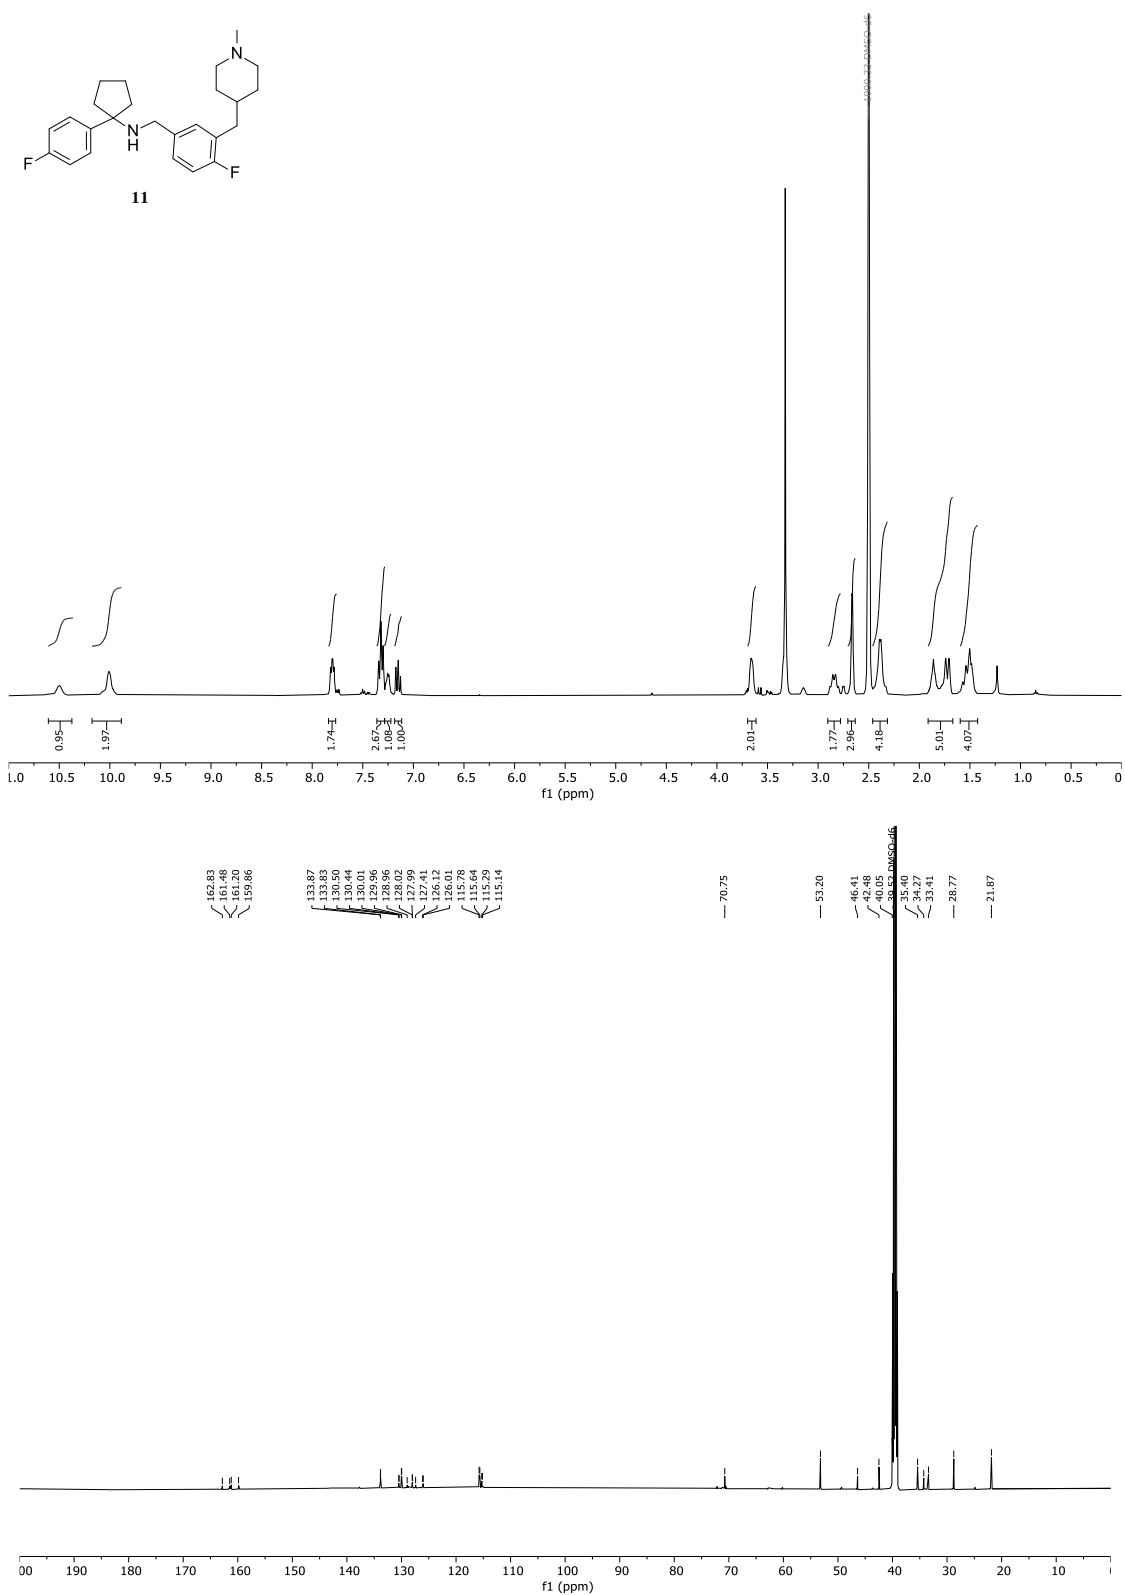

Compound **12**:  $^1\text{H}$  NMR (400 MHz,  $\text{DMSO-}d_6$ ) and  $^{13}\text{C}$  NMR (101 MHz,  $\text{DMSO-}d_6$ )

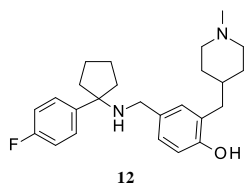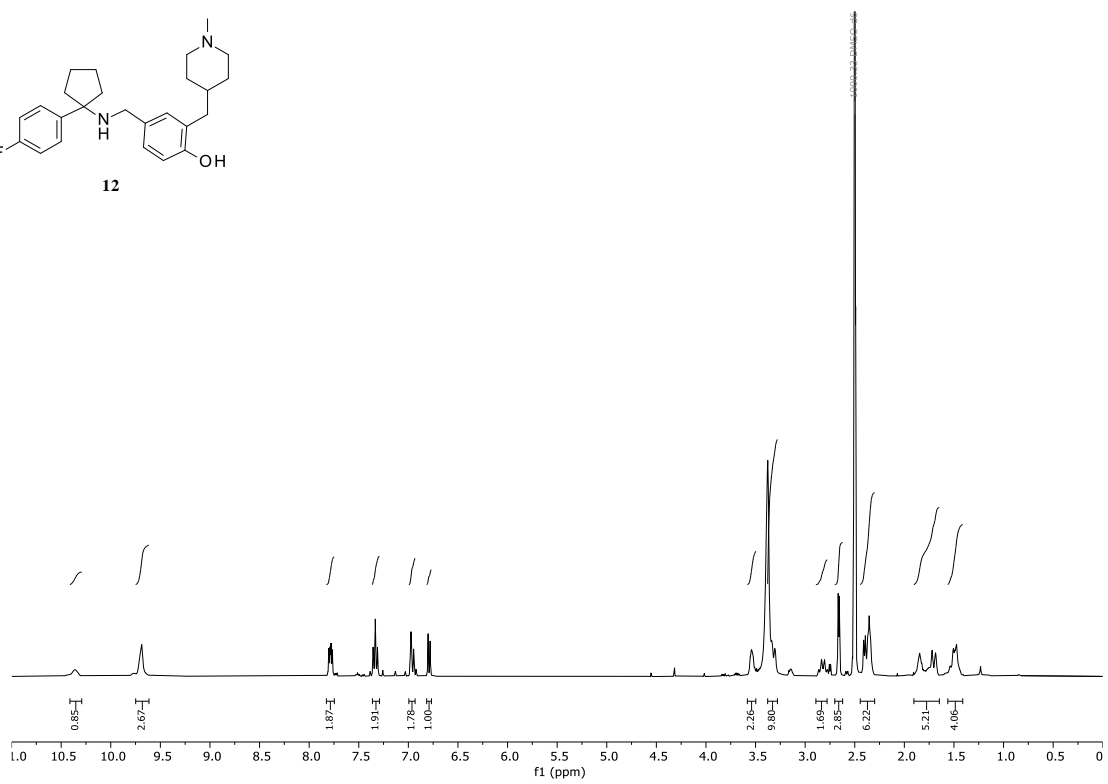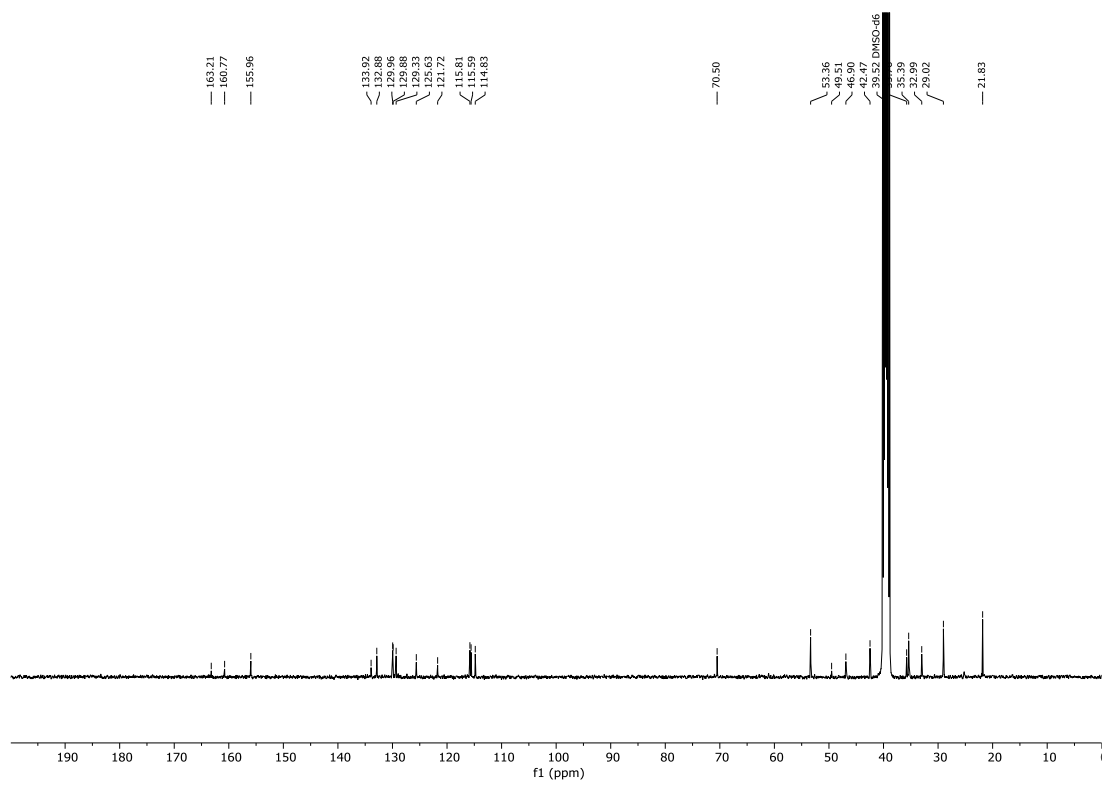

Compound **13**:  $^1\text{H}$  NMR (400 MHz,  $\text{DMSO-}d_6$ ) and  $^{13}\text{C}$  NMR (101 MHz,  $\text{DMSO-}d_6$ )

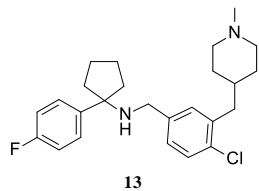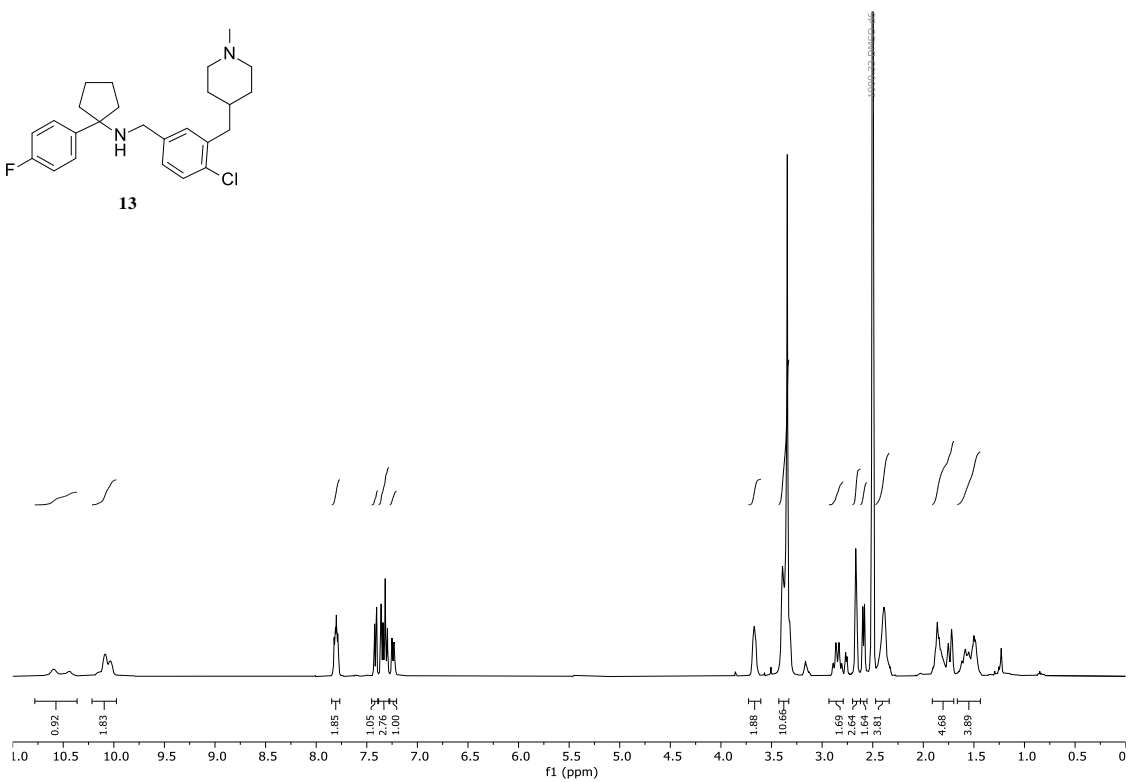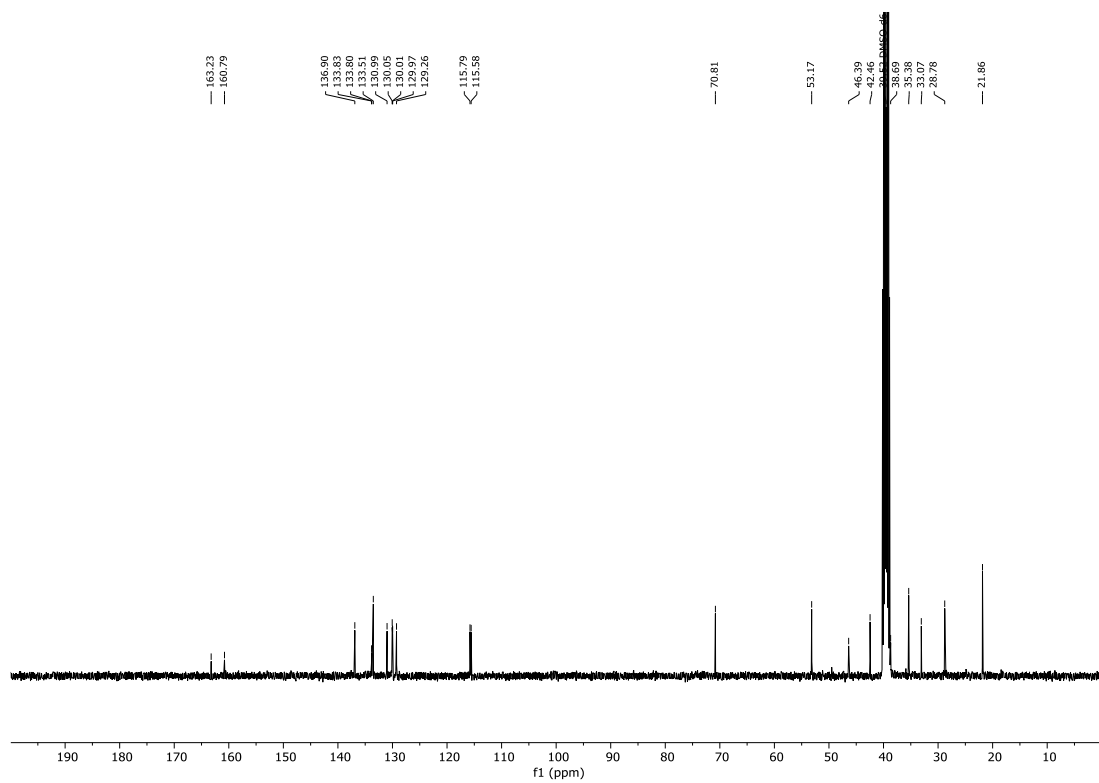

Compound **14**:  $^1\text{H}$  NMR (400 MHz,  $\text{DMSO-}d_6$ ) and  $^{13}\text{C}$  NMR (101 MHz,  $\text{DMSO-}d_6$ )

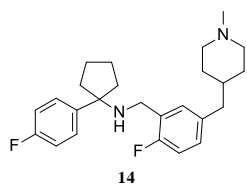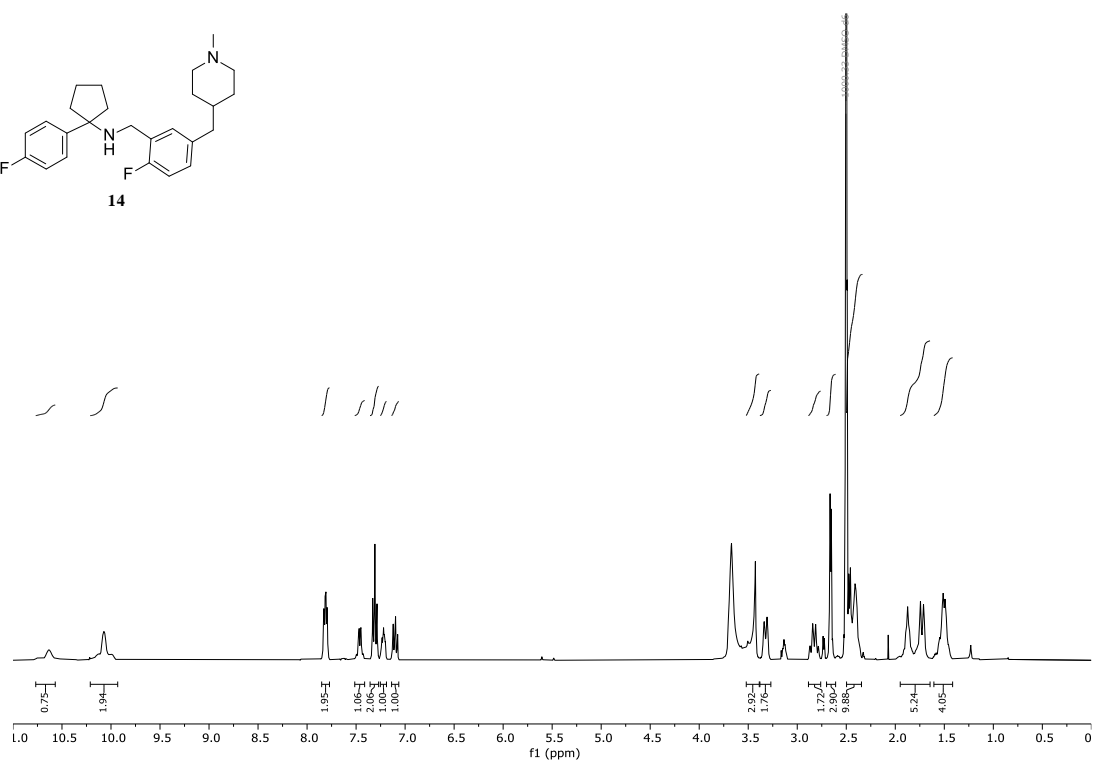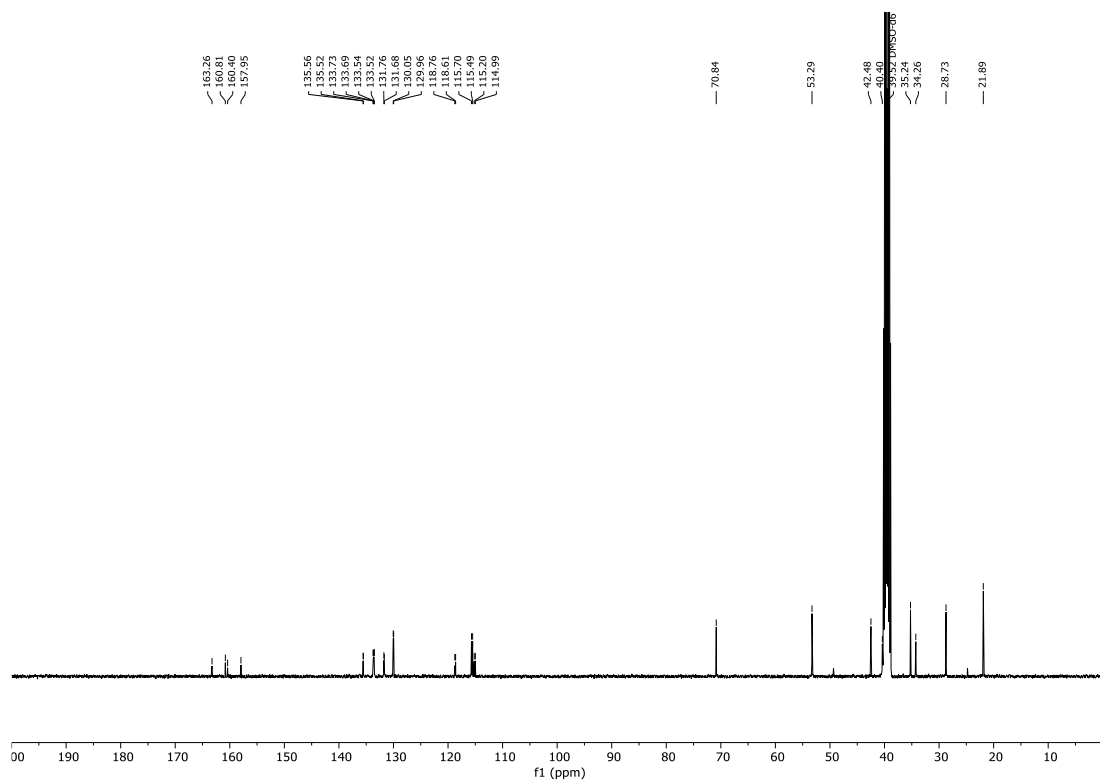

Compound **15**:  $^1\text{H}$  NMR (400 MHz,  $\text{DMSO-}d_6$ ) and  $^{13}\text{C}$  NMR (101 MHz,  $\text{DMSO-}d_6$ )

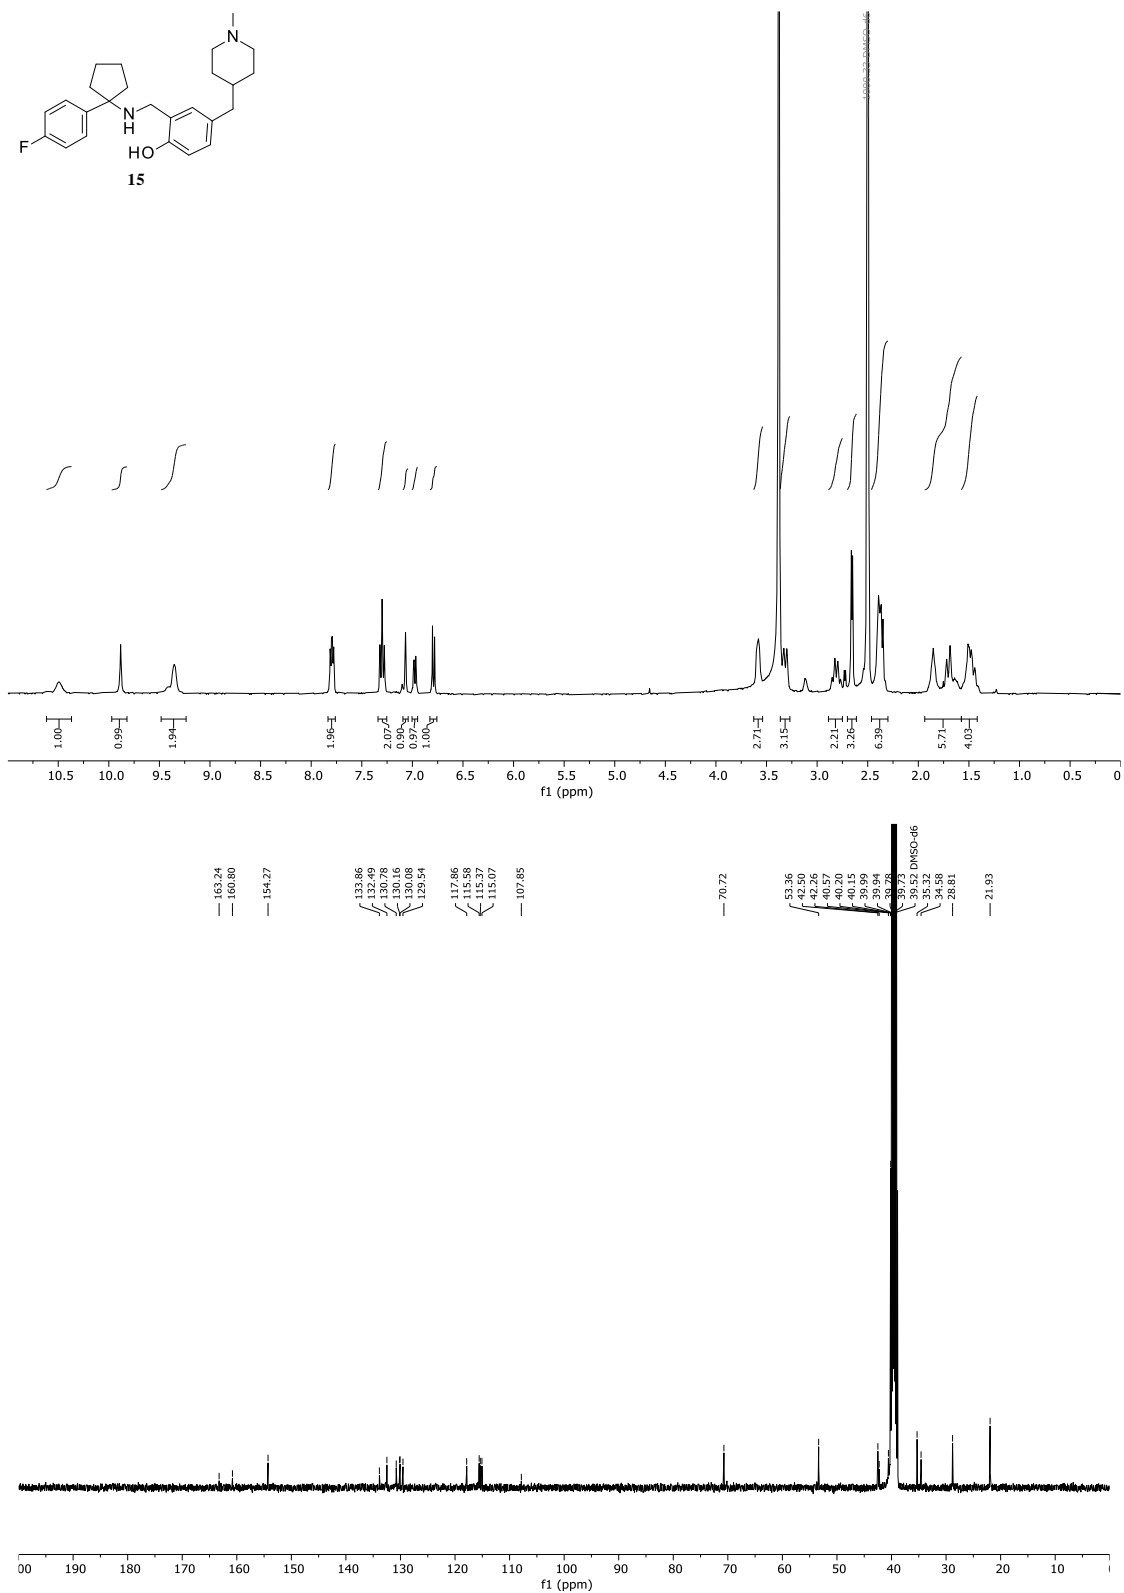

Compound **16**:  $^1\text{H}$  NMR (400 MHz,  $\text{DMSO-}d_6$ ) and  $^{13}\text{C}$  NMR (101 MHz,  $\text{DMSO-}d_6$ )

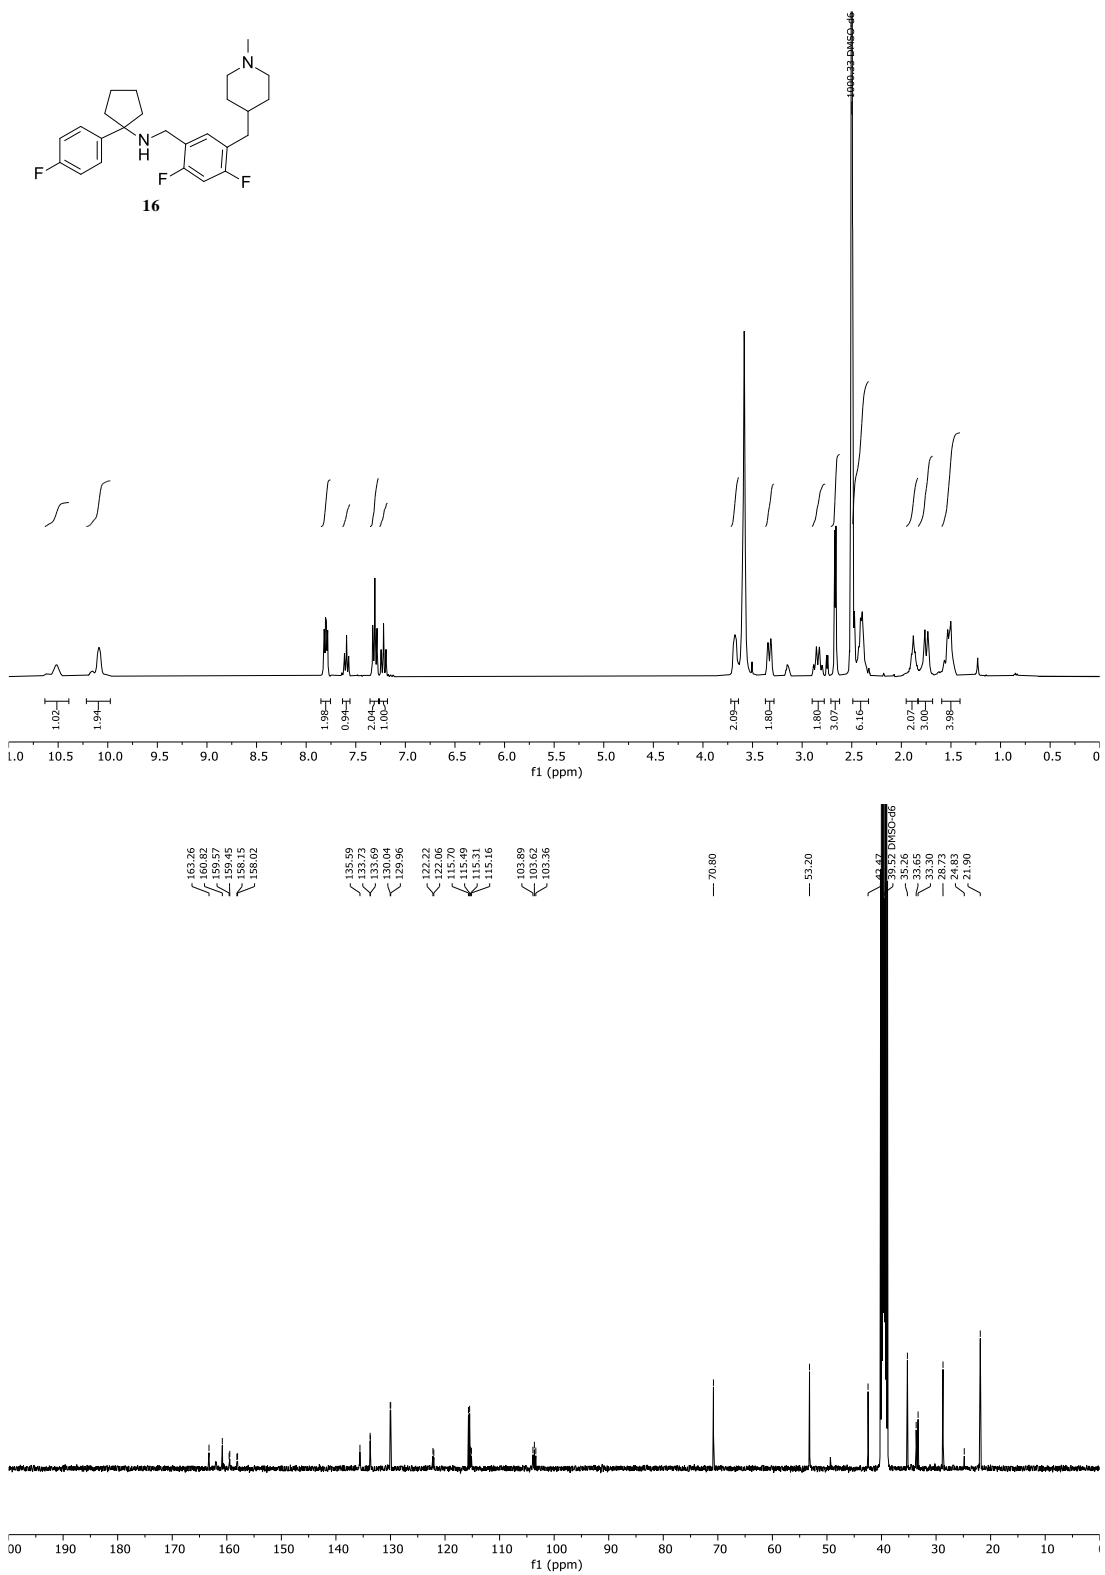

Compound **17**:  $^1\text{H}$  NMR (400 MHz,  $\text{DMSO-}d_6$ ) and  $^{13}\text{C}$  NMR (101 MHz,  $\text{DMSO-}d_6$ )

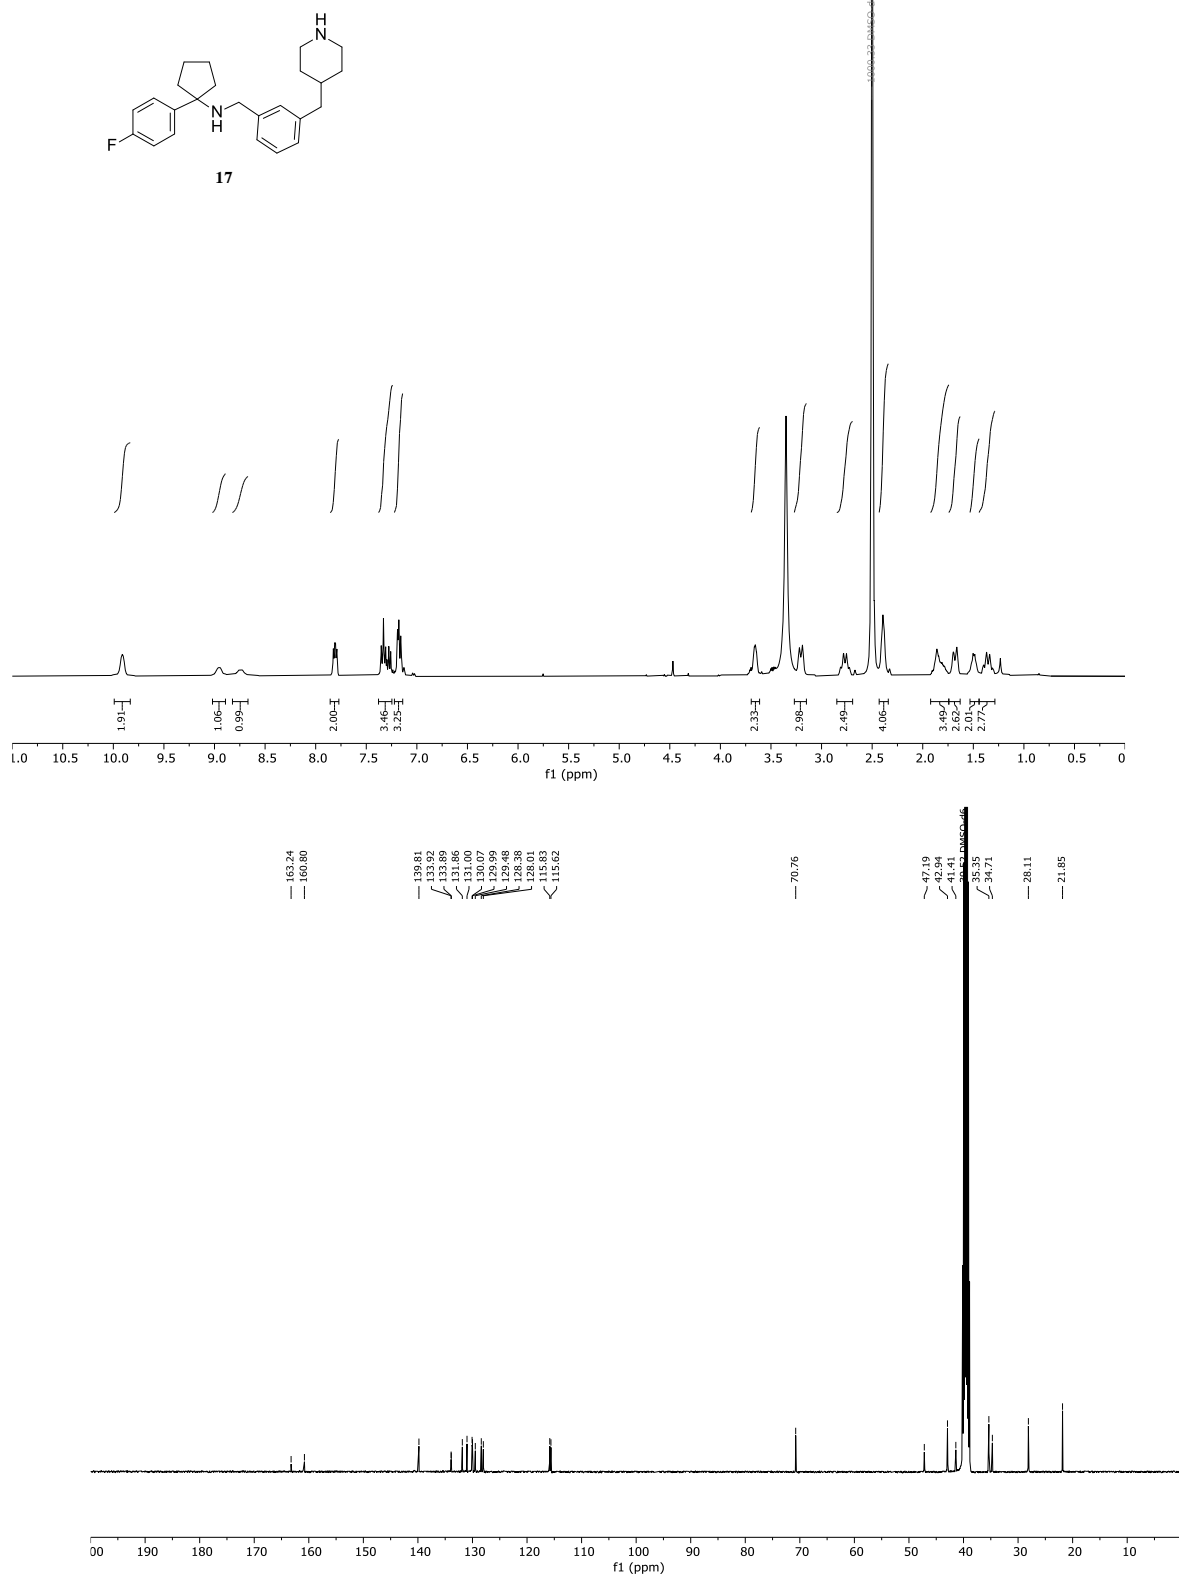



Compound **18**:  $^1\text{H}$  NMR (400 MHz,  $\text{DMSO-}d_6$ ) and  $^{13}\text{C}$  NMR (151 MHz,  $\text{DMSO-}d_6$ )

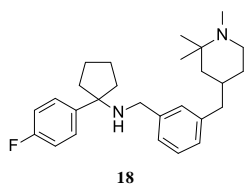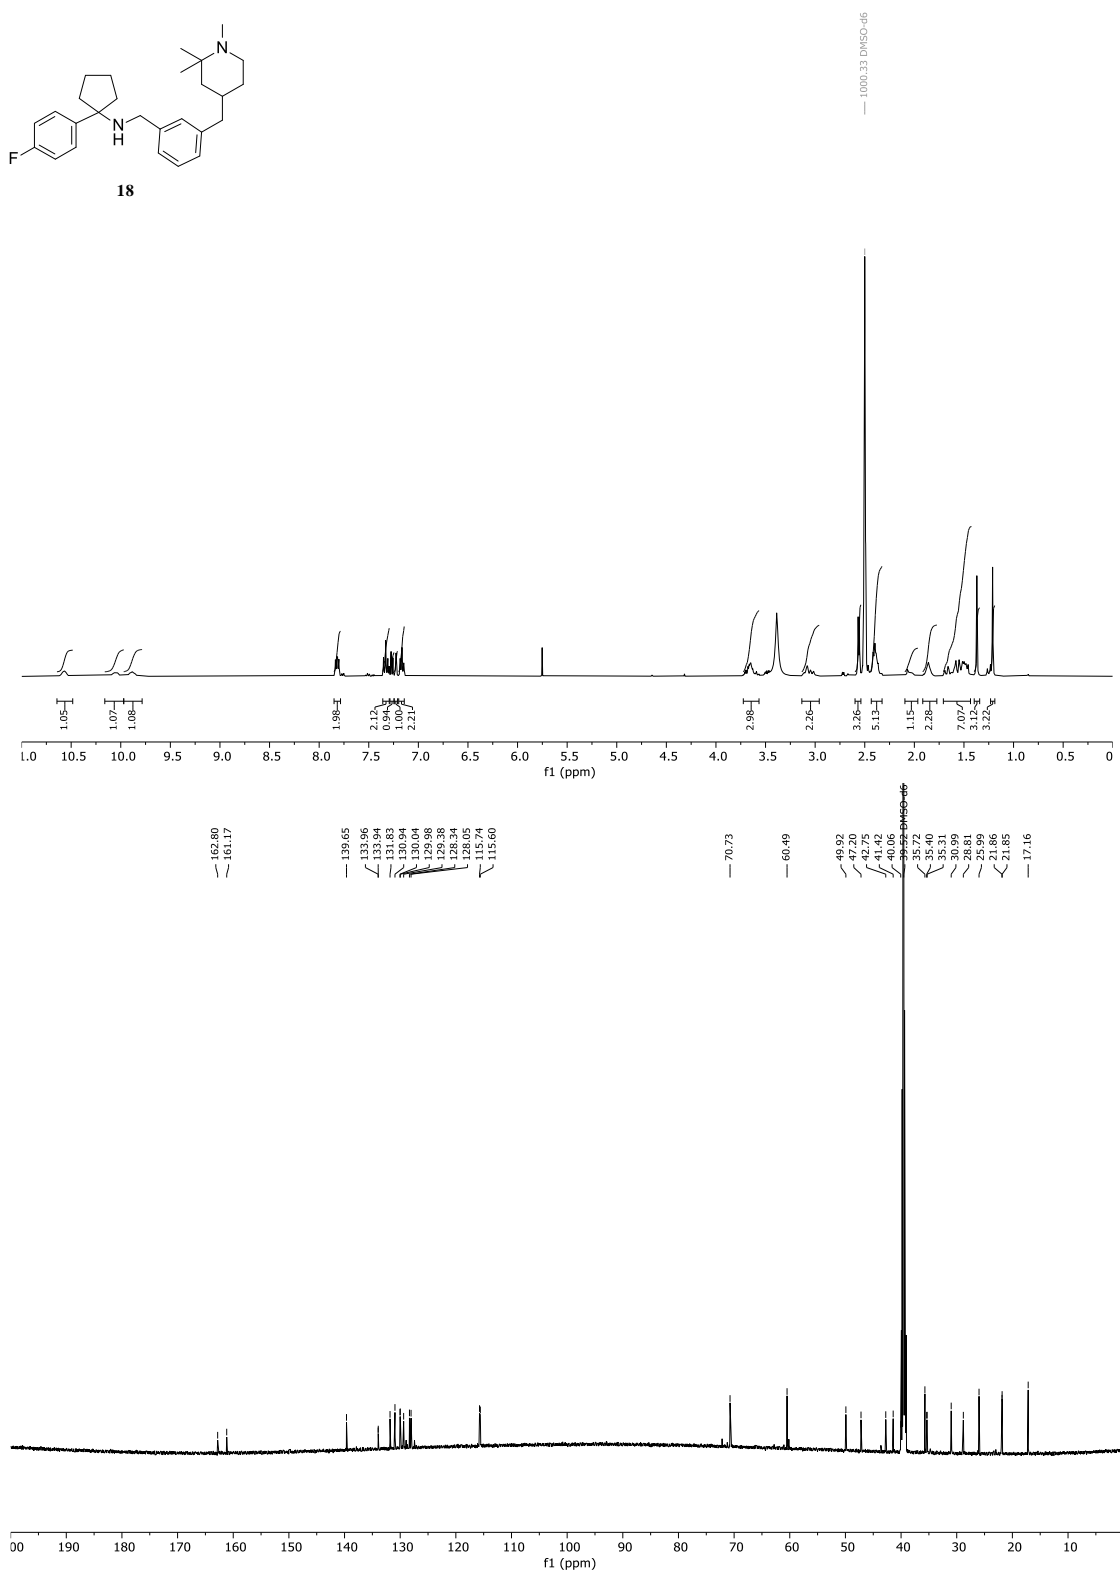

Compound **19**:  $^1\text{H}$  NMR (400 MHz,  $\text{DMSO-}d_6$ ) and  $^{13}\text{C}$  NMR (151 MHz,  $\text{DMSO-}d_6$ )

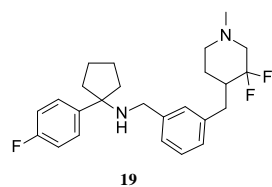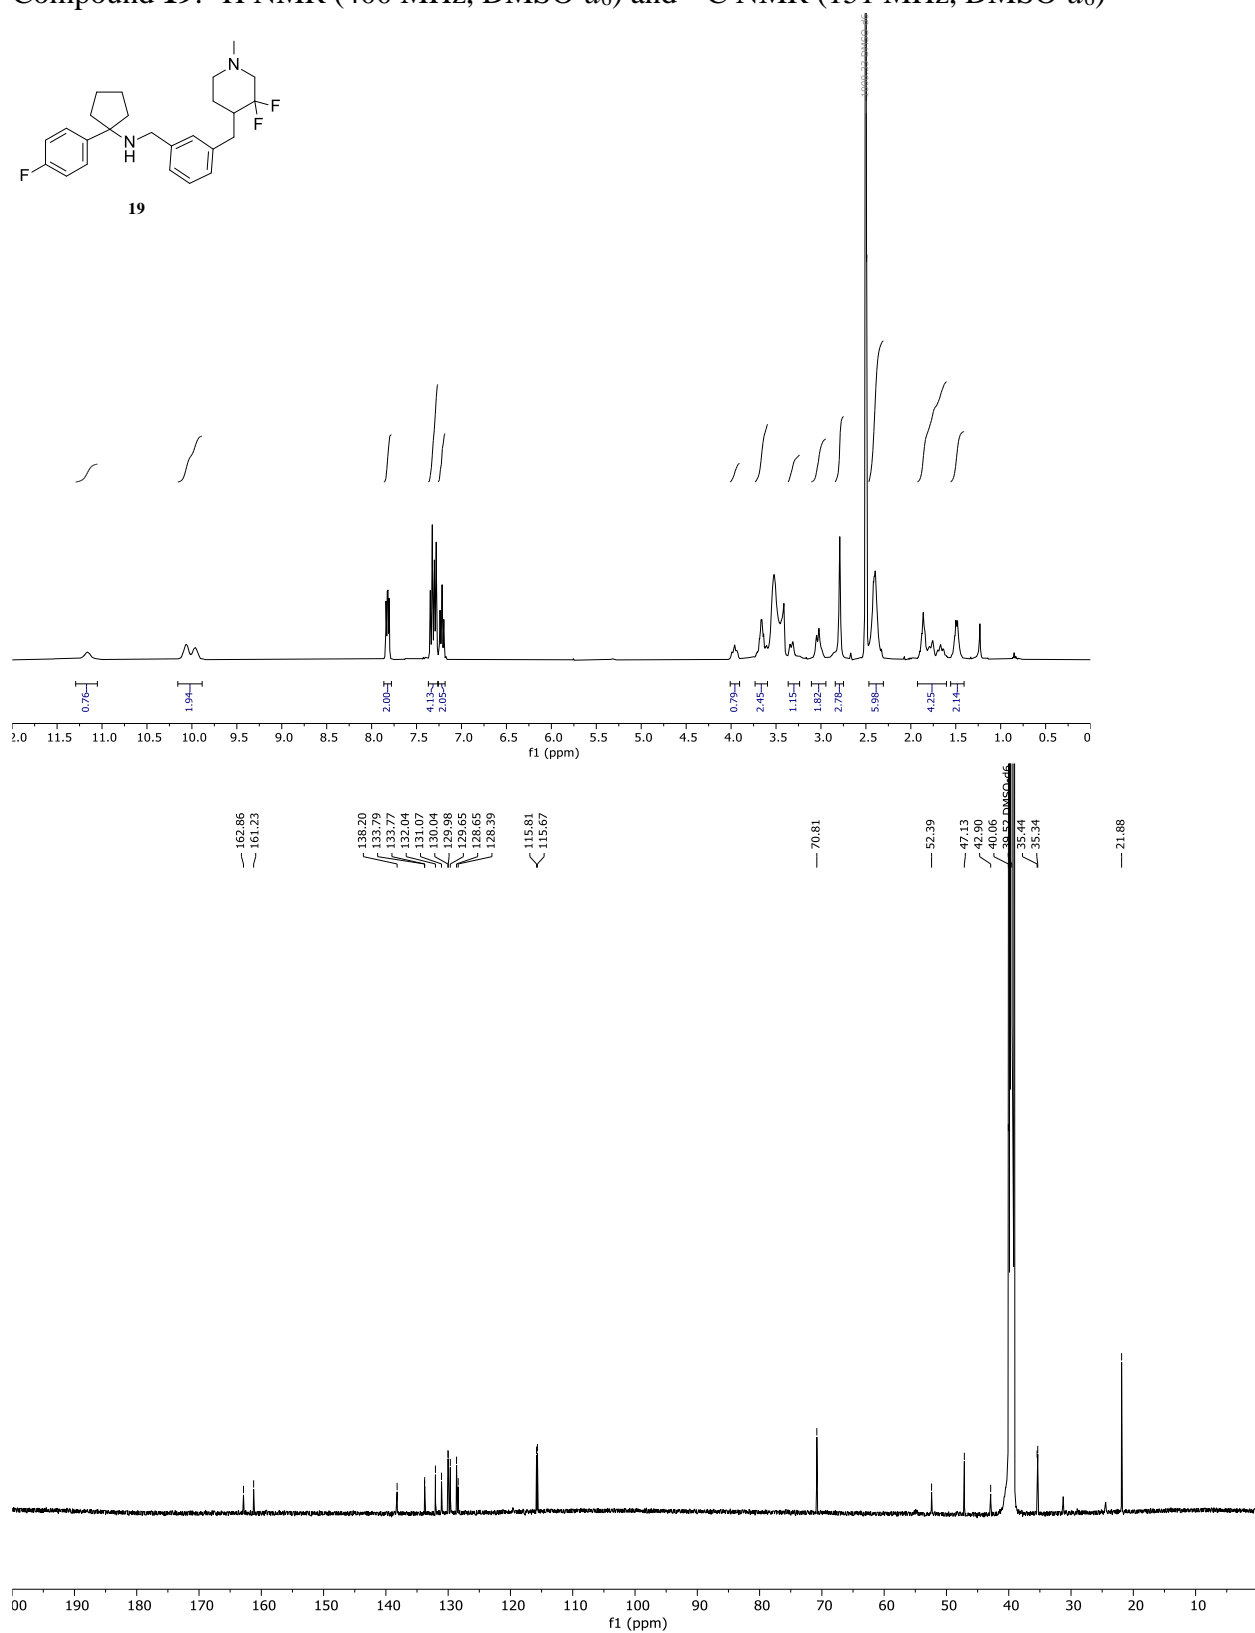

Compound **20**:  $^1\text{H}$  NMR (400 MHz,  $\text{DMSO-}d_6$ ) and  $^{13}\text{C}$  NMR (151 MHz,  $\text{DMSO-}d_6$ )

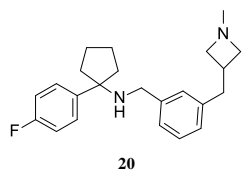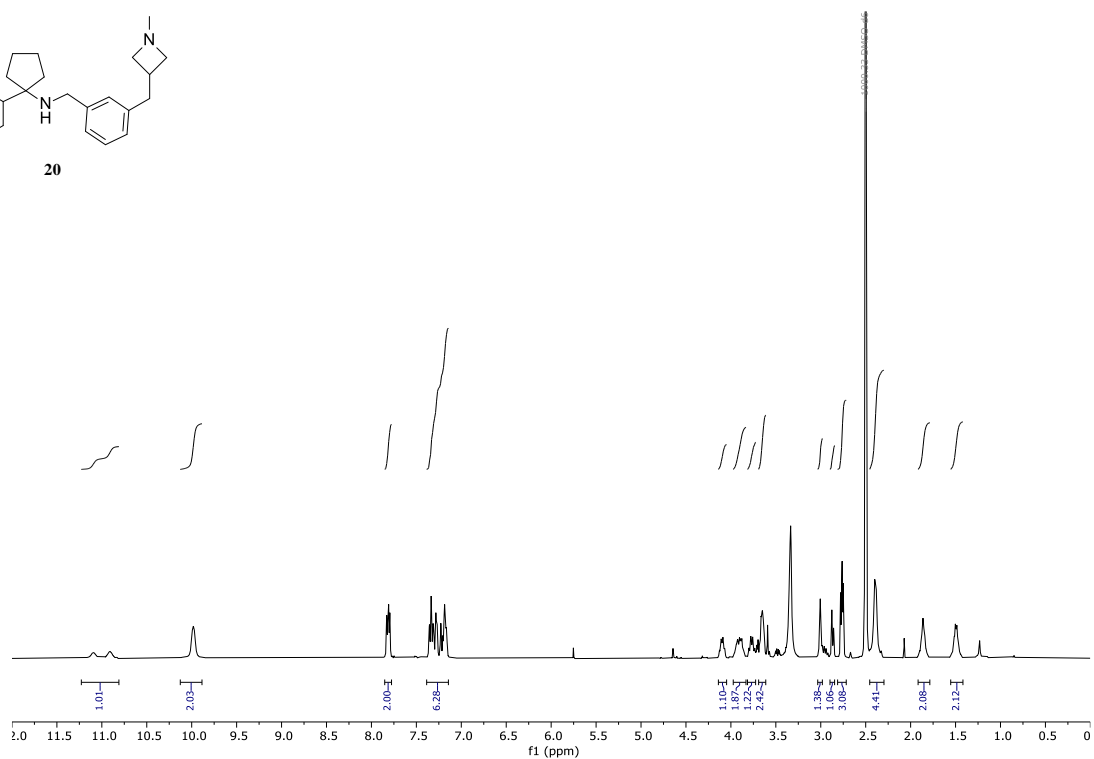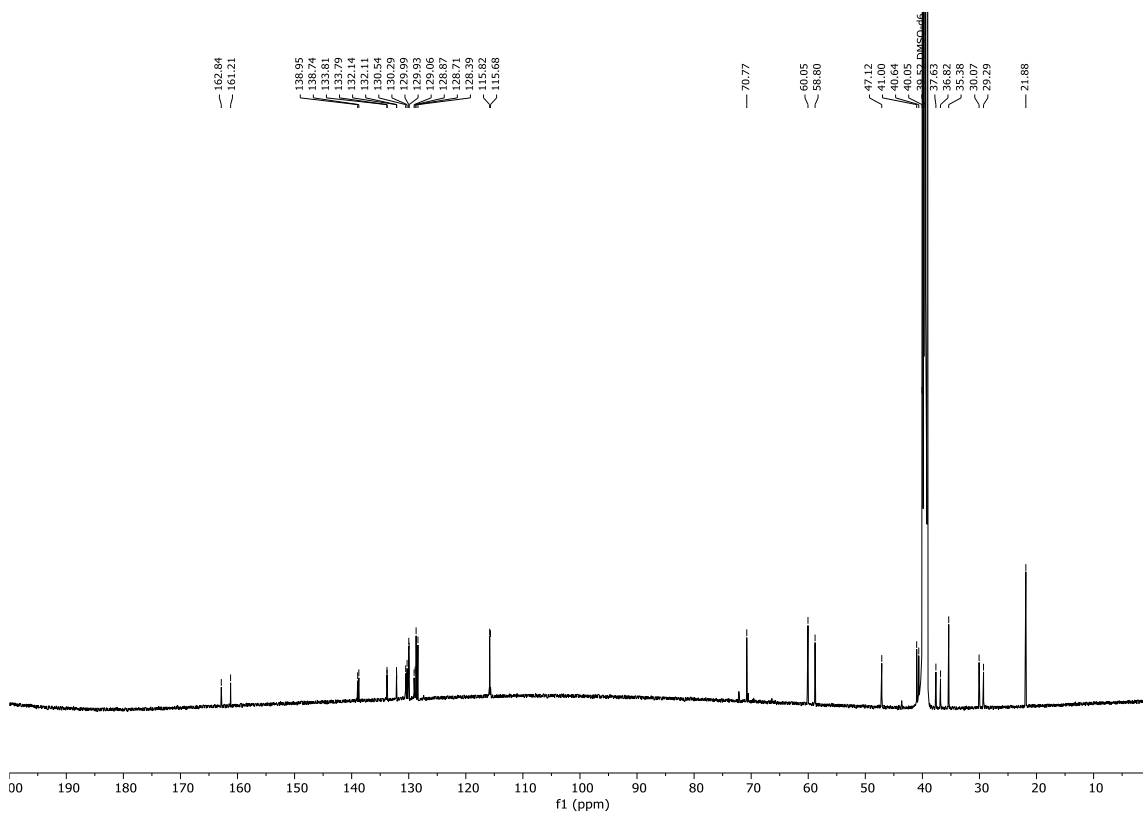

Compound **21**:  $^1\text{H}$ NMR (400 MHz,  $\text{DMSO-}d_6$ ) and  $^{13}\text{C}$  NMR (151 MHz,  $\text{DMSO-}d_6$ )

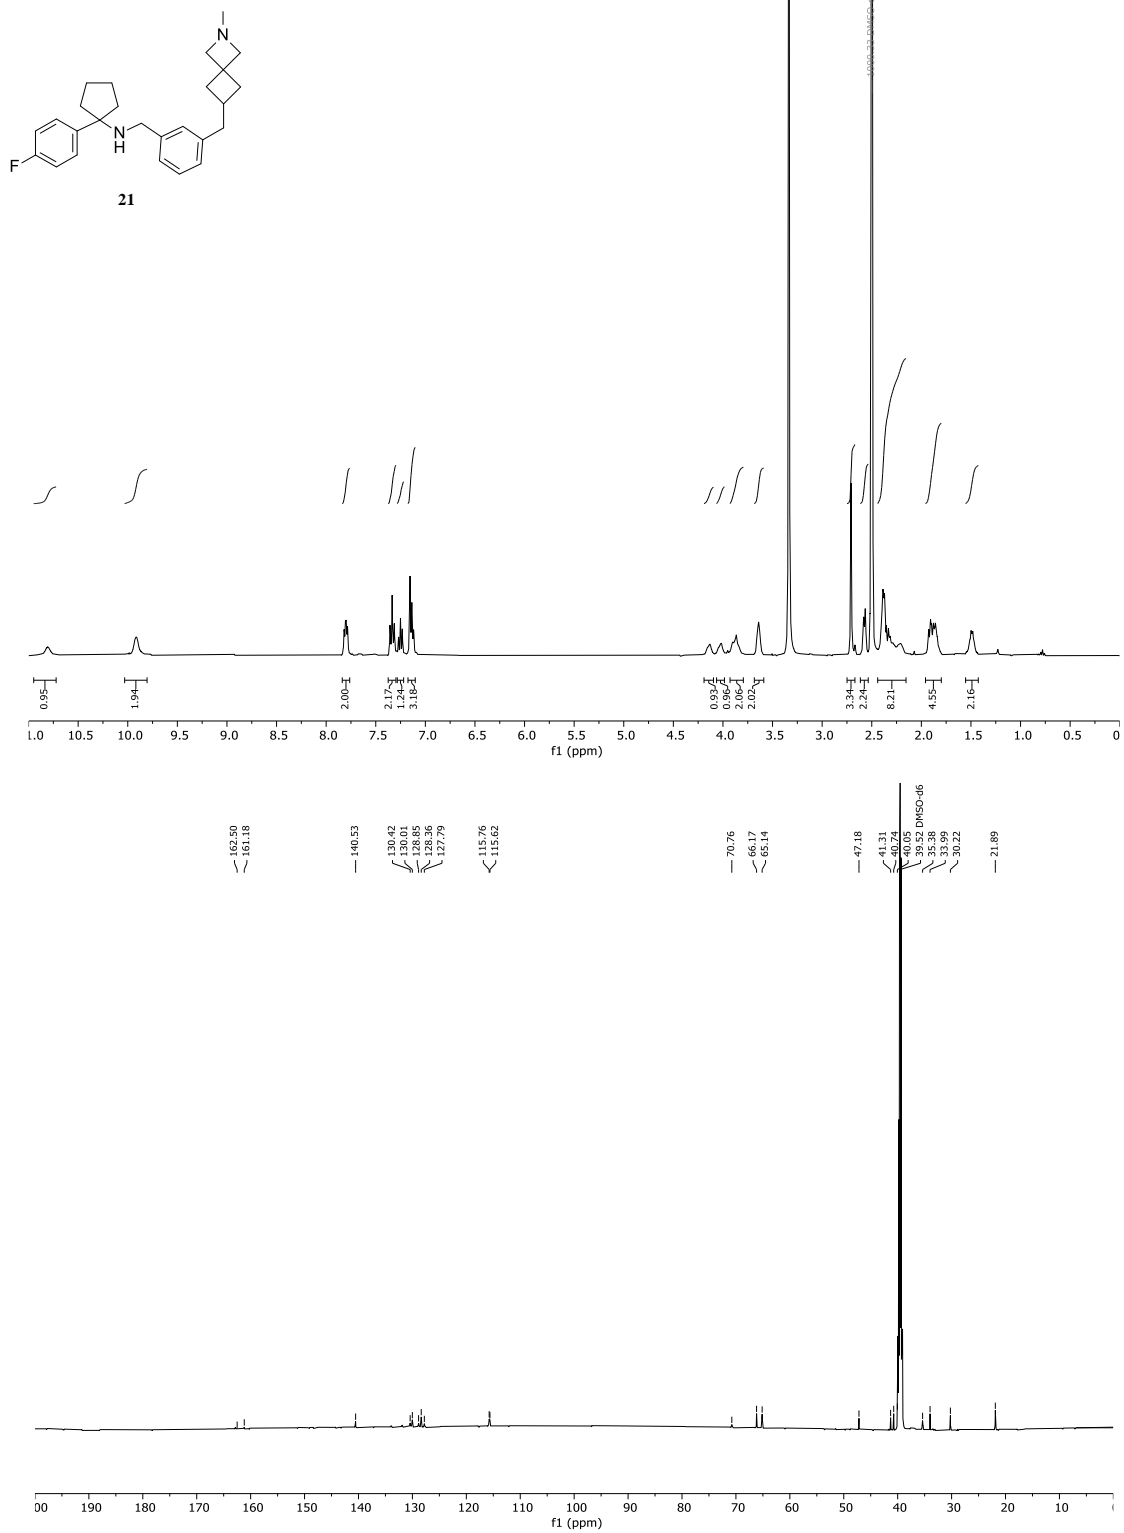

Compound **22**:  $^1\text{H}$  NMR (400 MHz,  $\text{DMSO-}d_6$ ) and  $^{13}\text{C}$  NMR (151 MHz,  $\text{DMSO-}d_6$ )

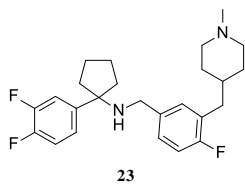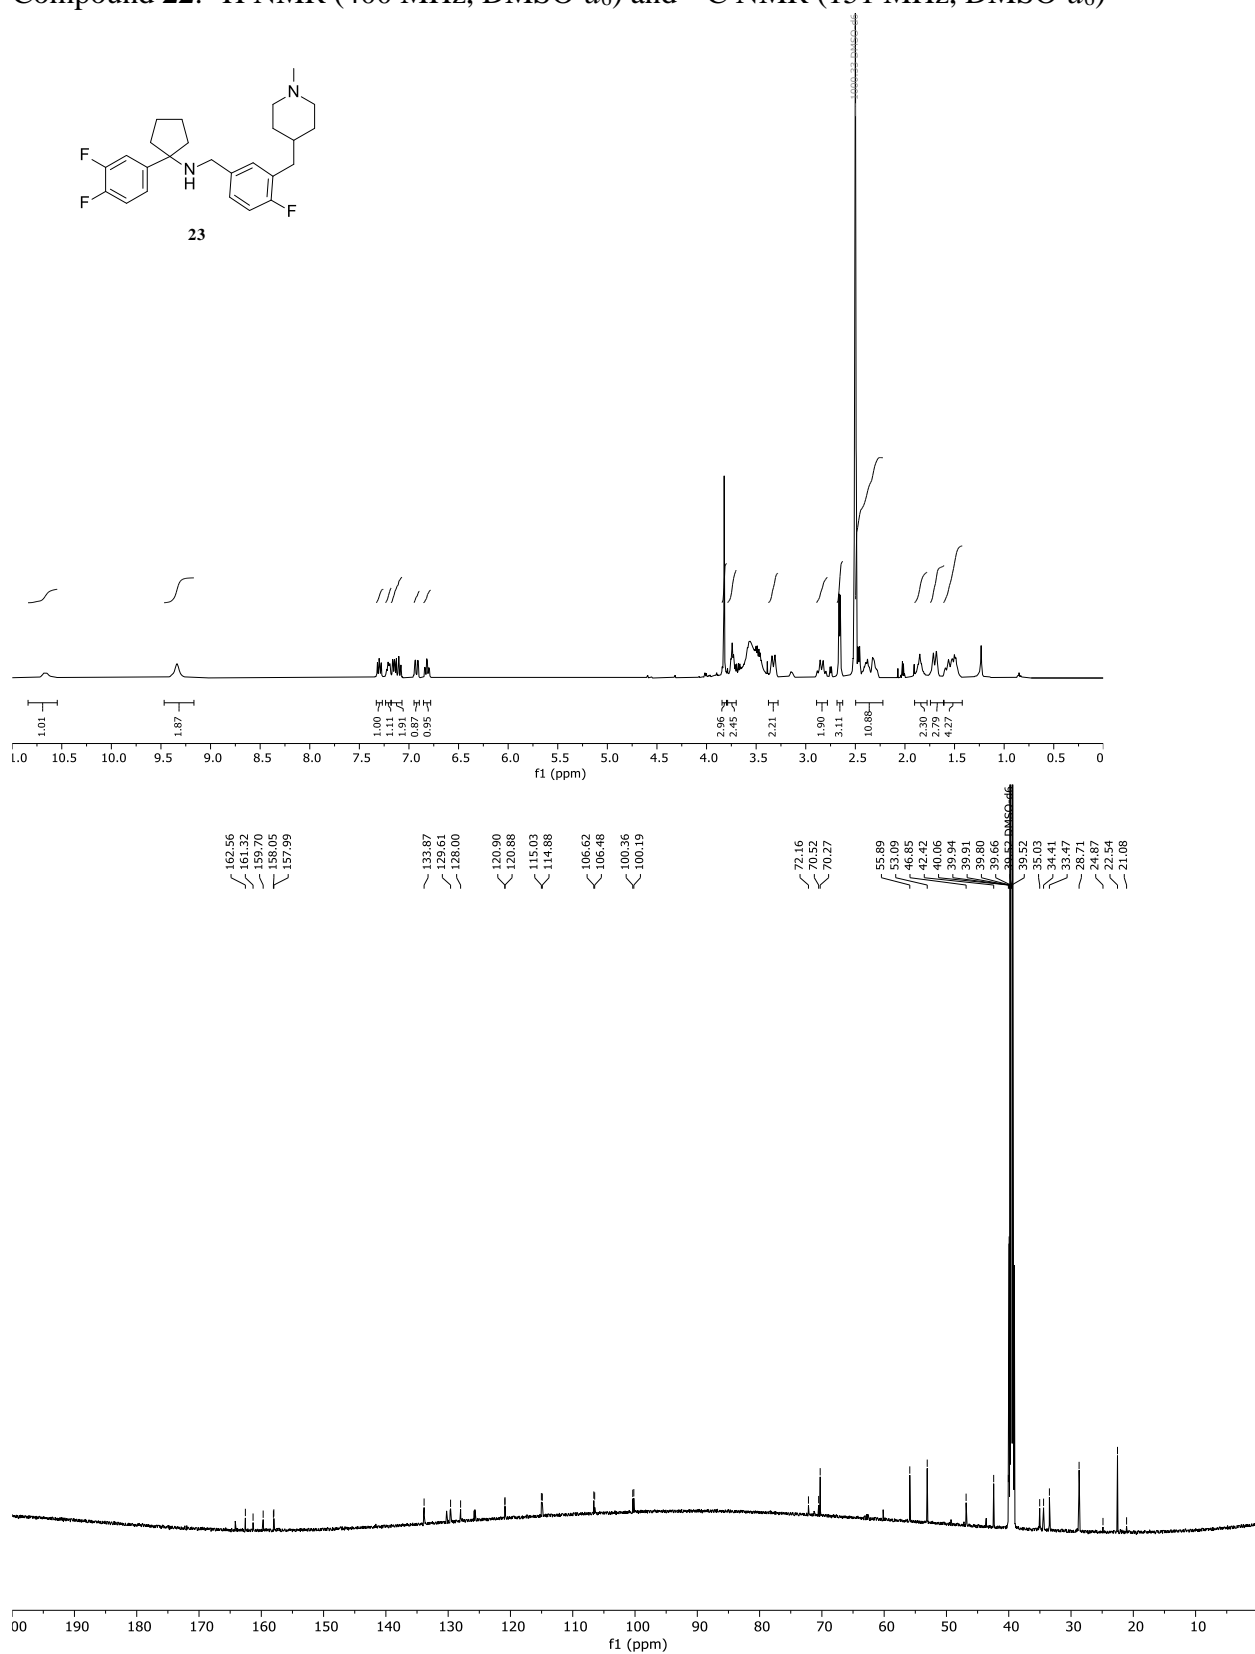

Compound **23**:  $^1\text{H}$  NMR (400 MHz,  $\text{DMSO-}d_6$ ) and  $^{13}\text{C}$  NMR (151 MHz,  $\text{DMSO-}d_6$ )

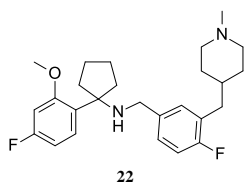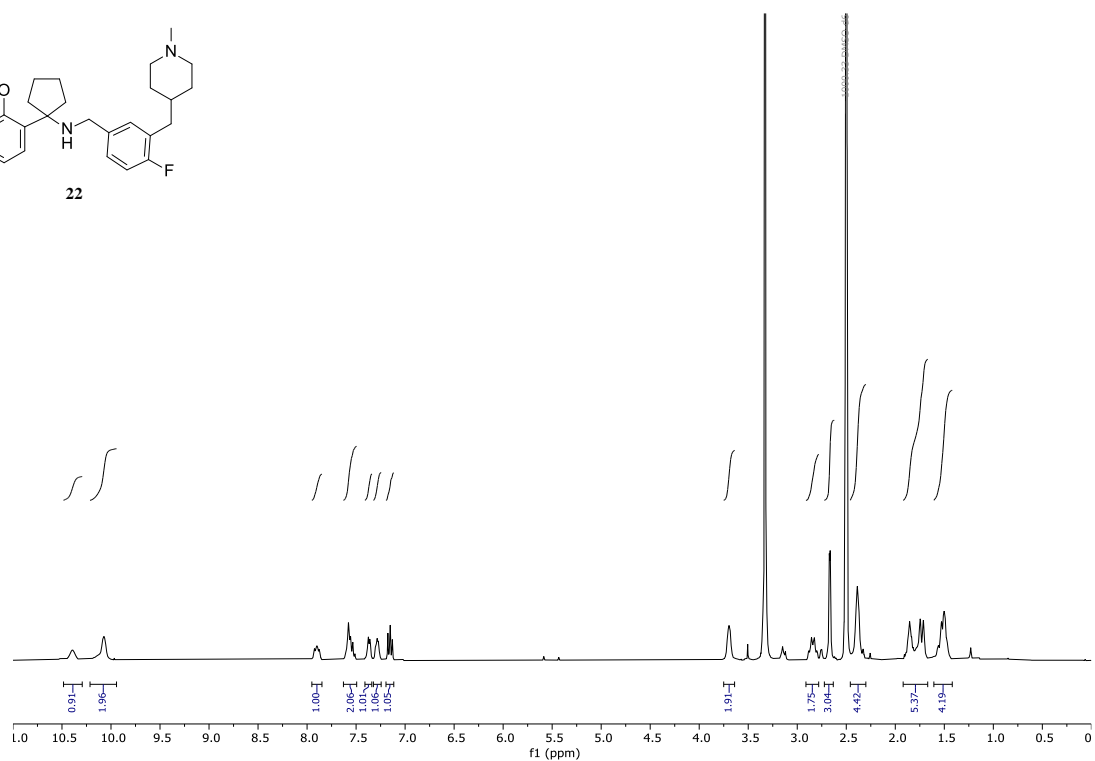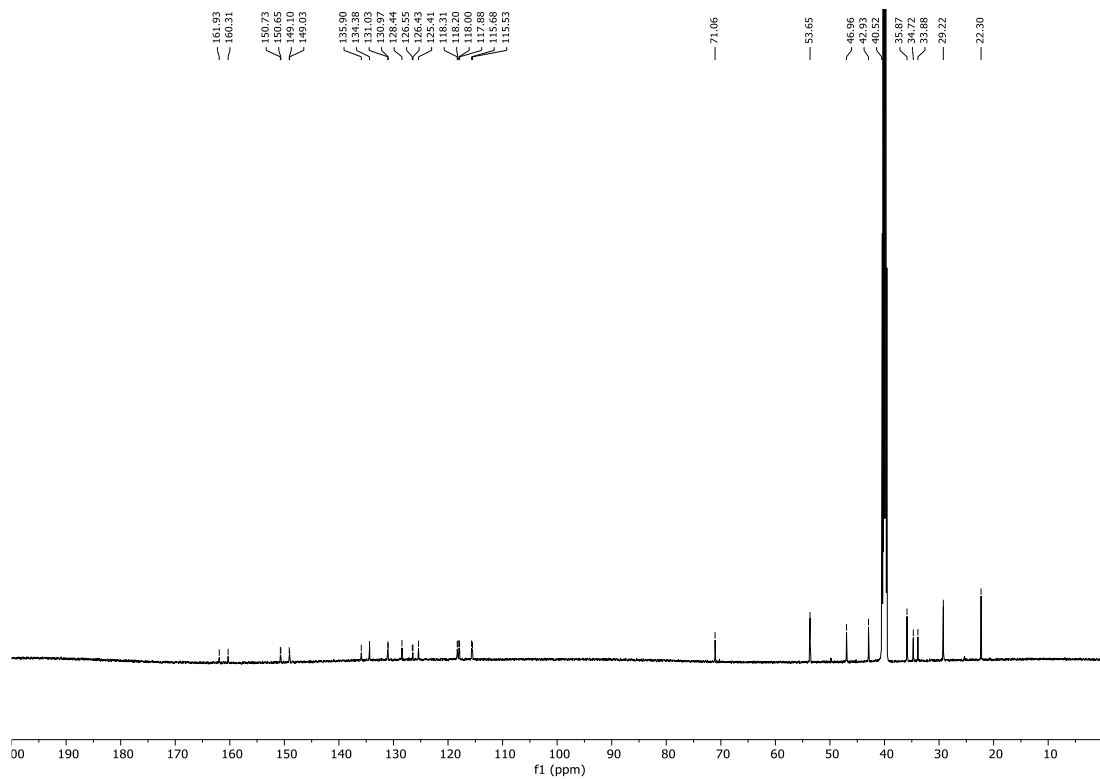

Compound **24**:  $^1\text{H}$  NMR (400 MHz,  $\text{DMSO-}d_6$ ) and  $^{13}\text{C}$  NMR (101 MHz,  $\text{DMSO-}d_6$ )

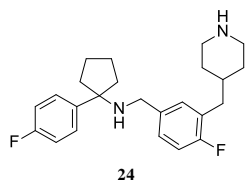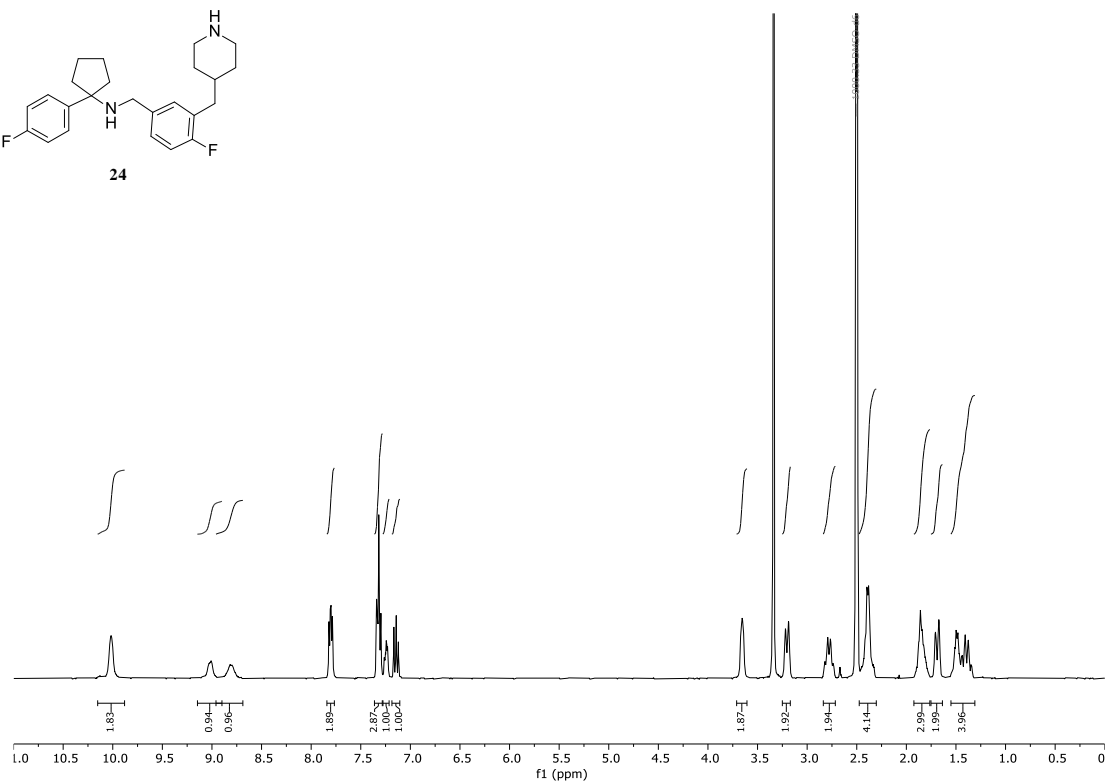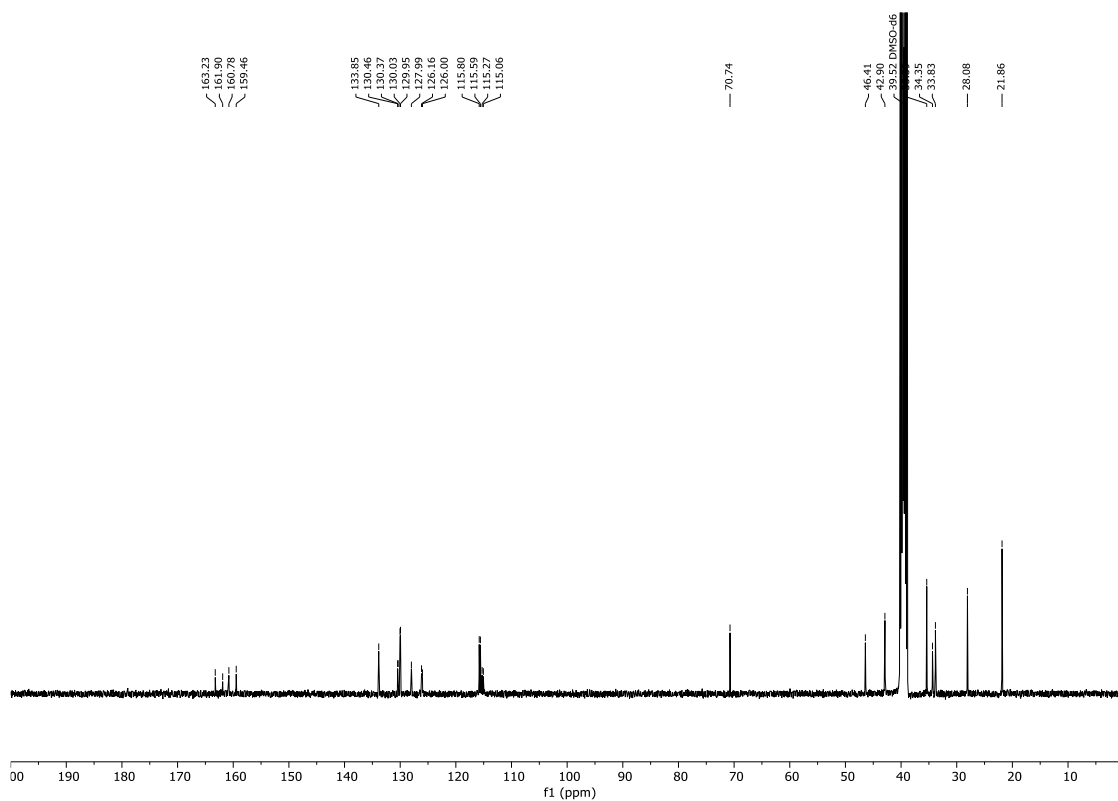

Compound **25**:  $^1\text{H}$  NMR (400 MHz,  $\text{DMSO-}d_6$ ) and  $^{13}\text{C}$  NMR (101 MHz,  $\text{DMSO-}d_6$ )

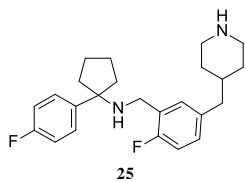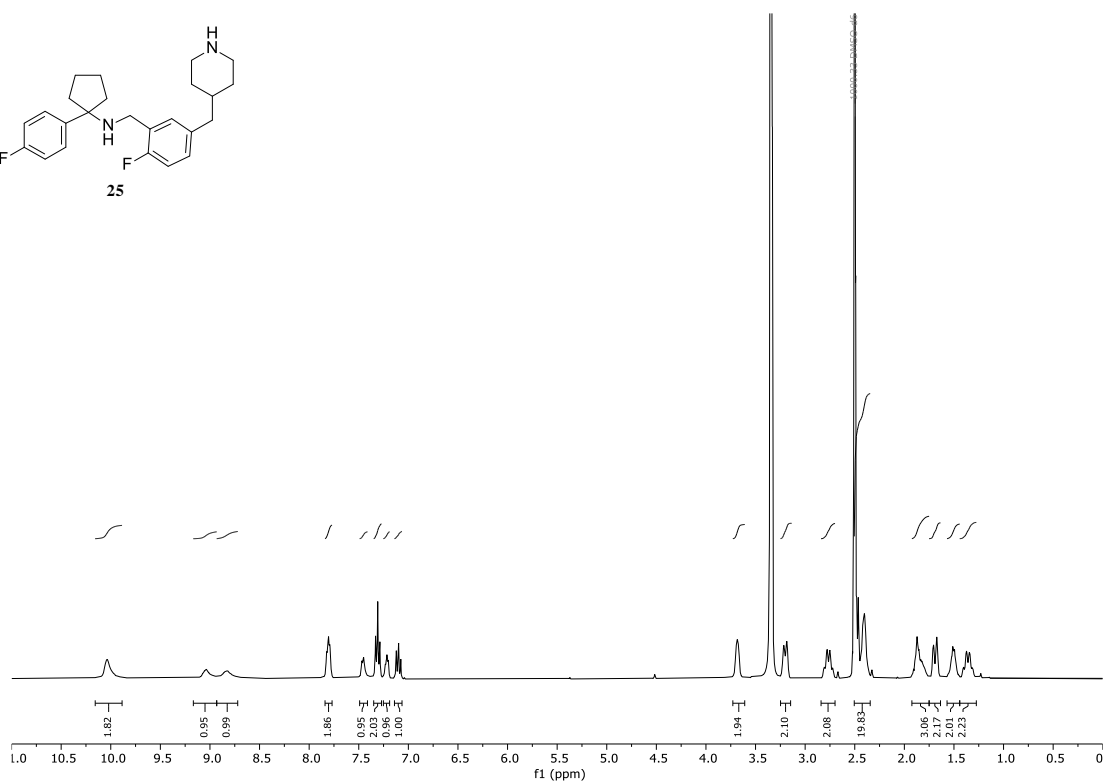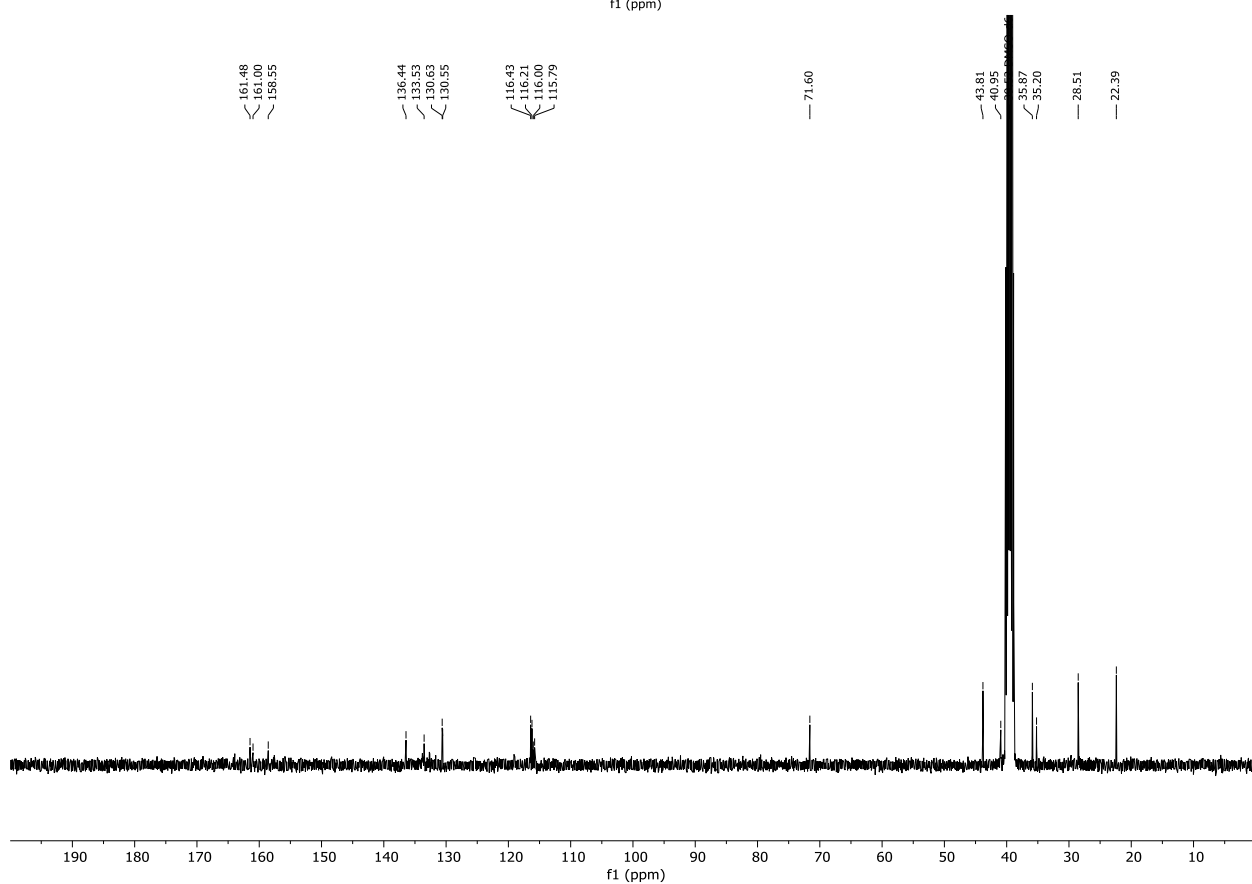



Compound **26**:  $^1\text{H}$  NMR (400 MHz,  $\text{DMSO-}d_6$ ) and  $^{13}\text{C}$  NMR (151 MHz,  $\text{DMSO-}d_6$ )

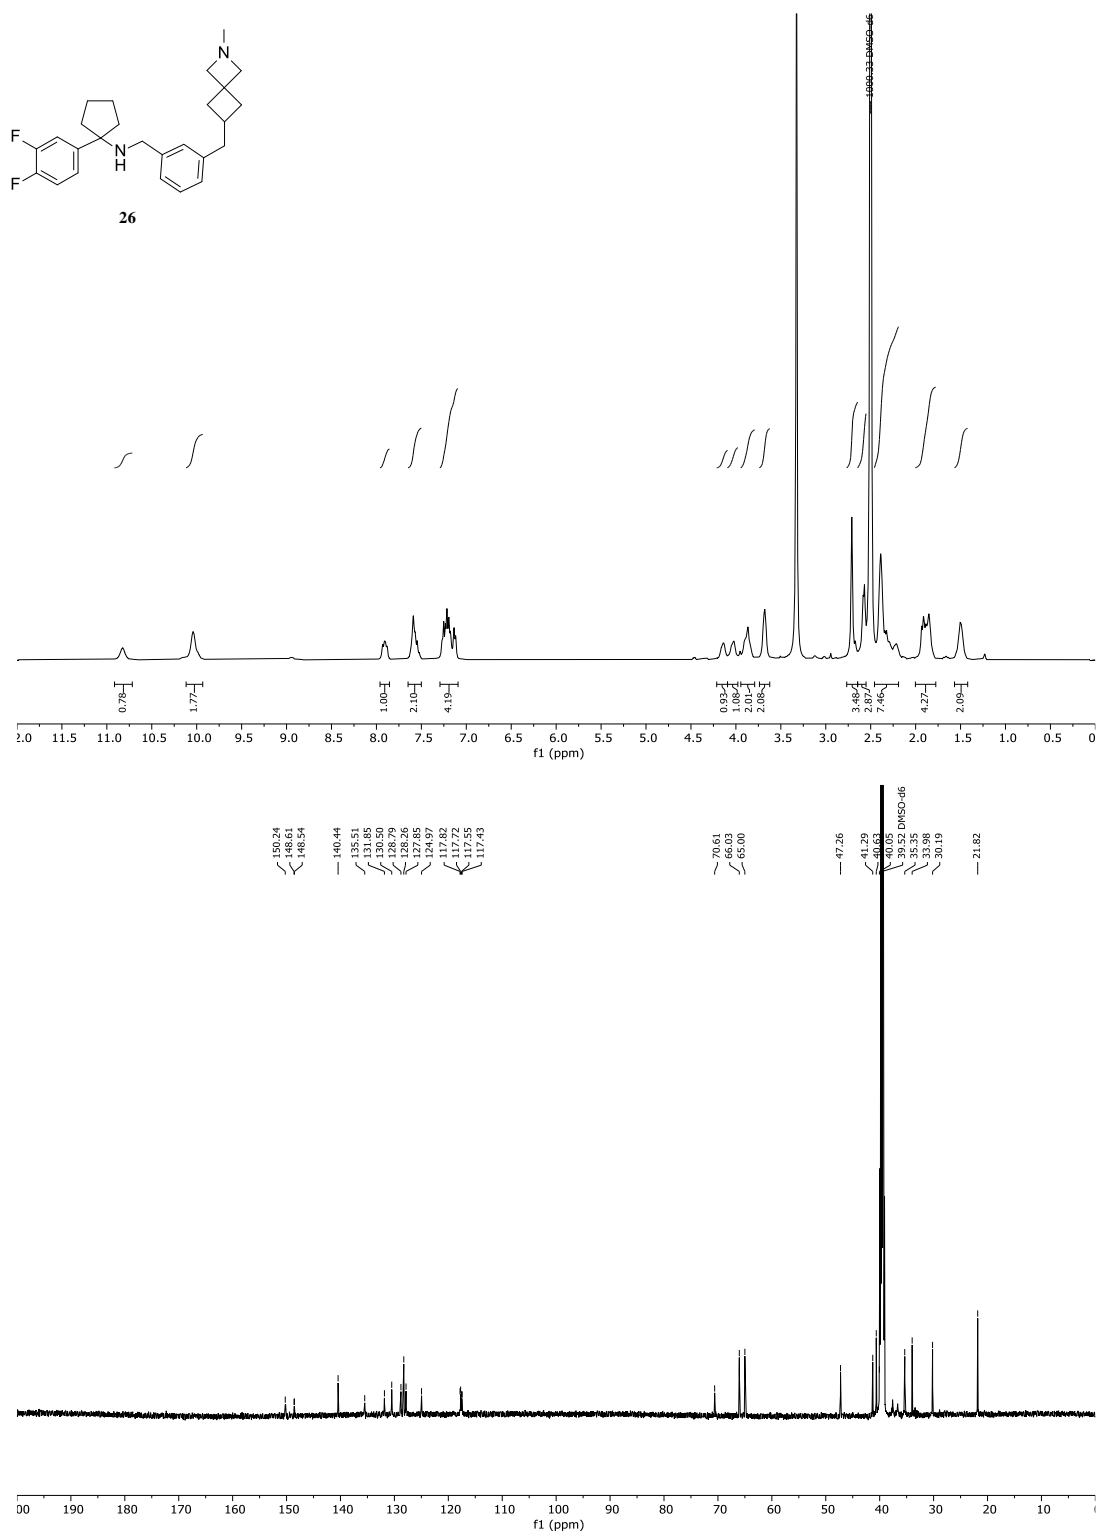

Compound 3: UPLC/MS analysis

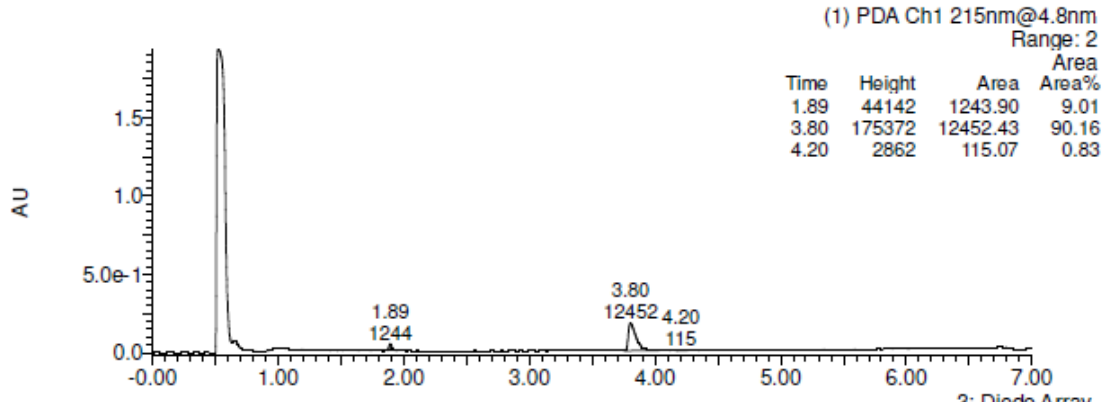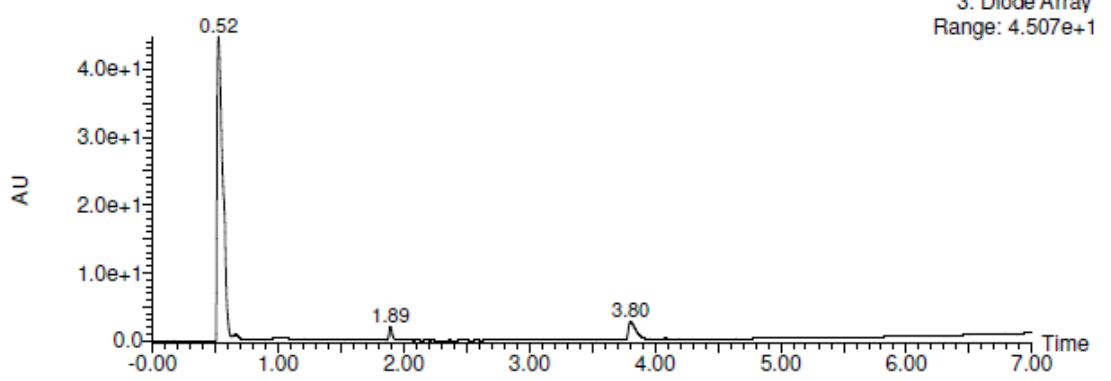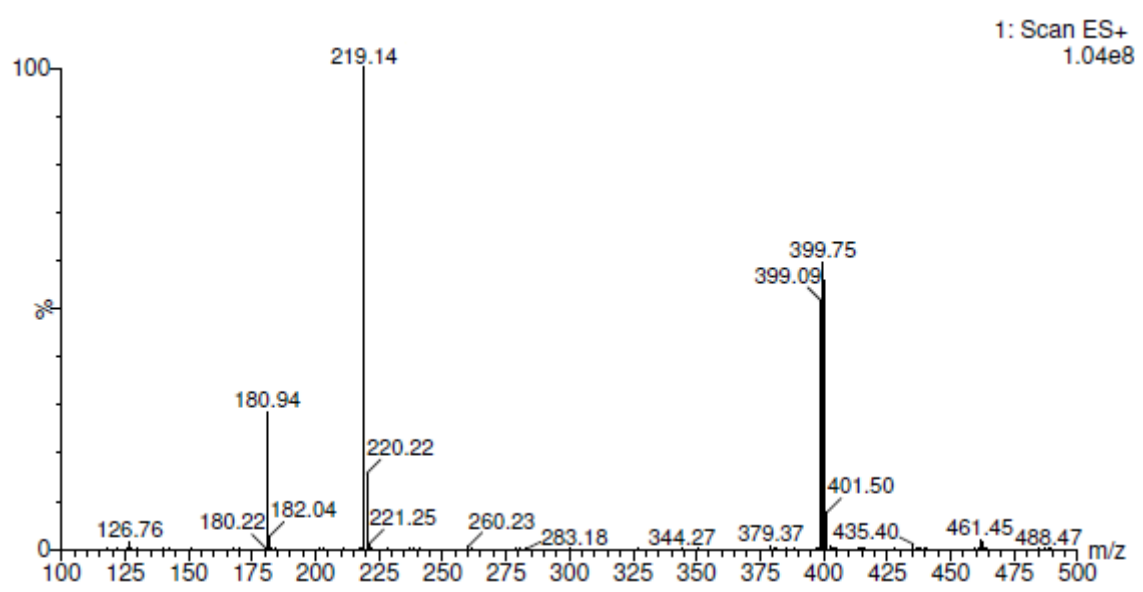

Compound 4: UPLC/MS analysis

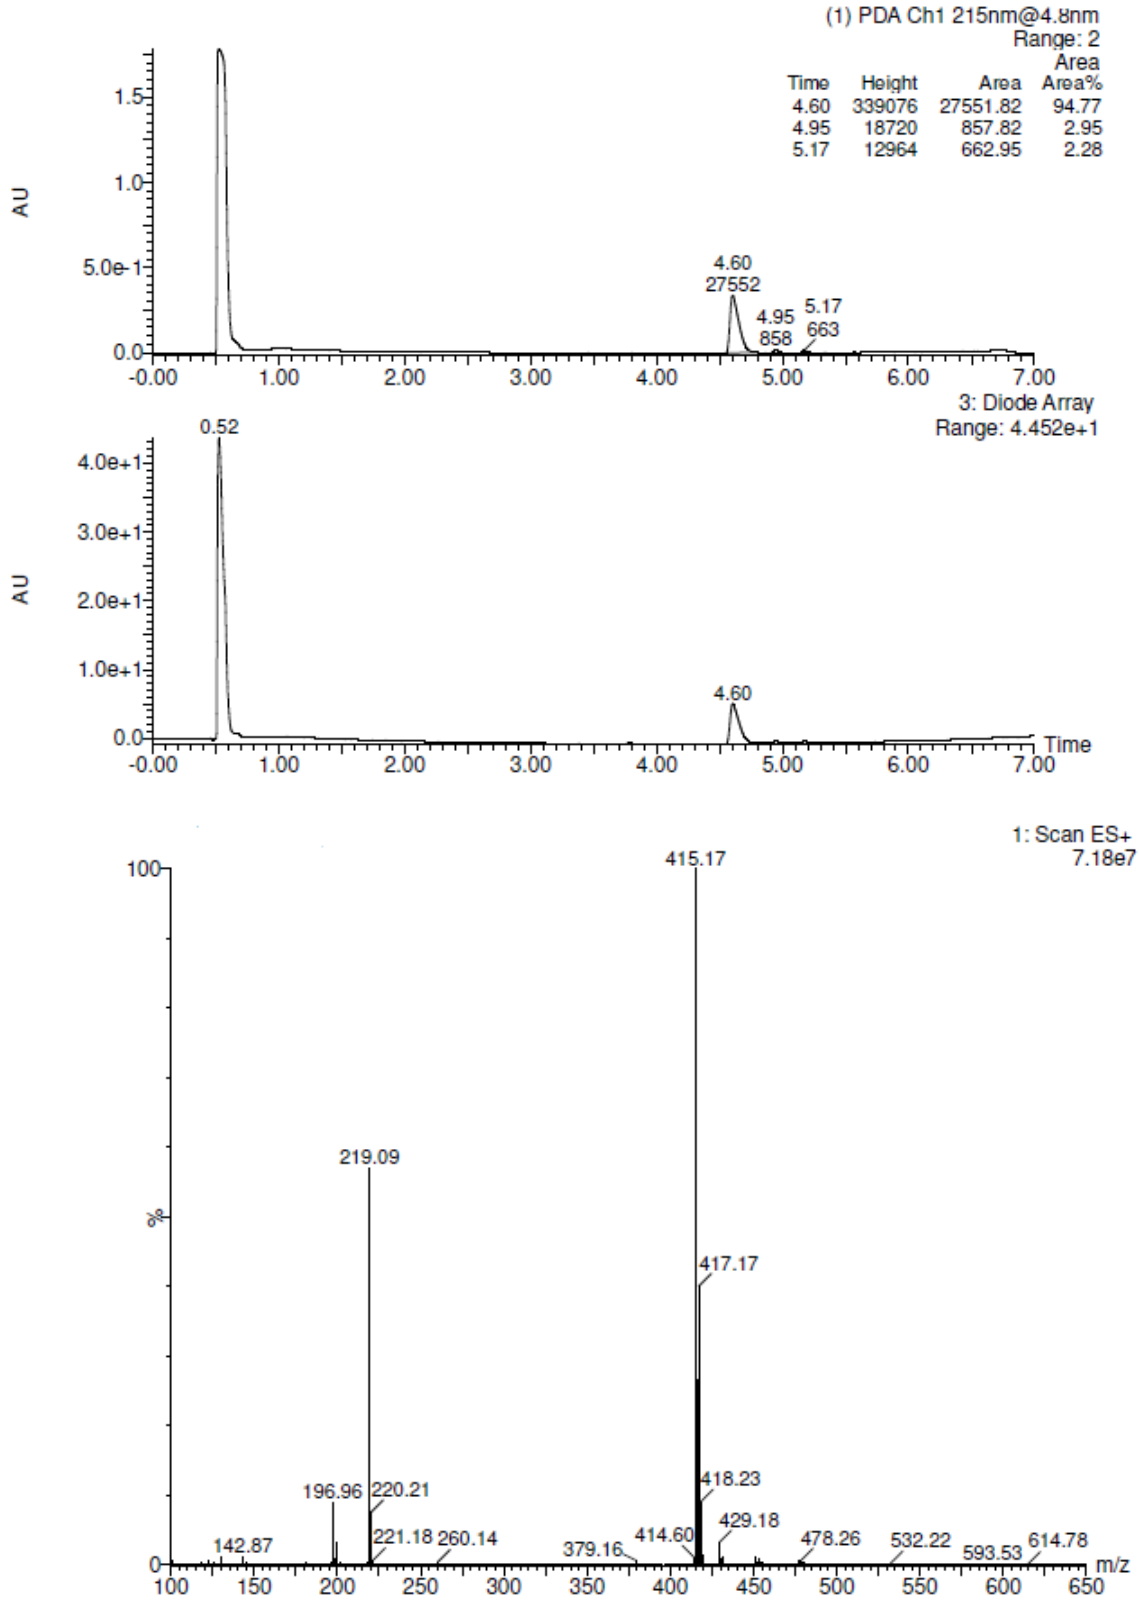

Compound 5: UPLC/MS analysis

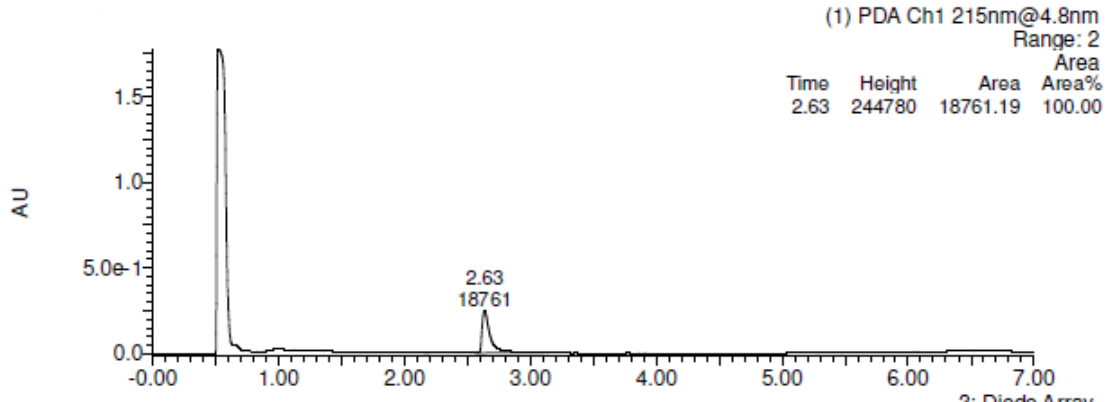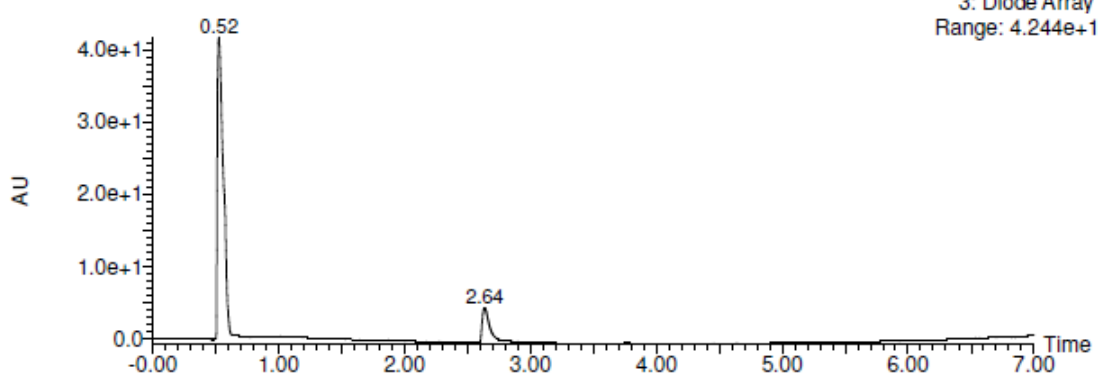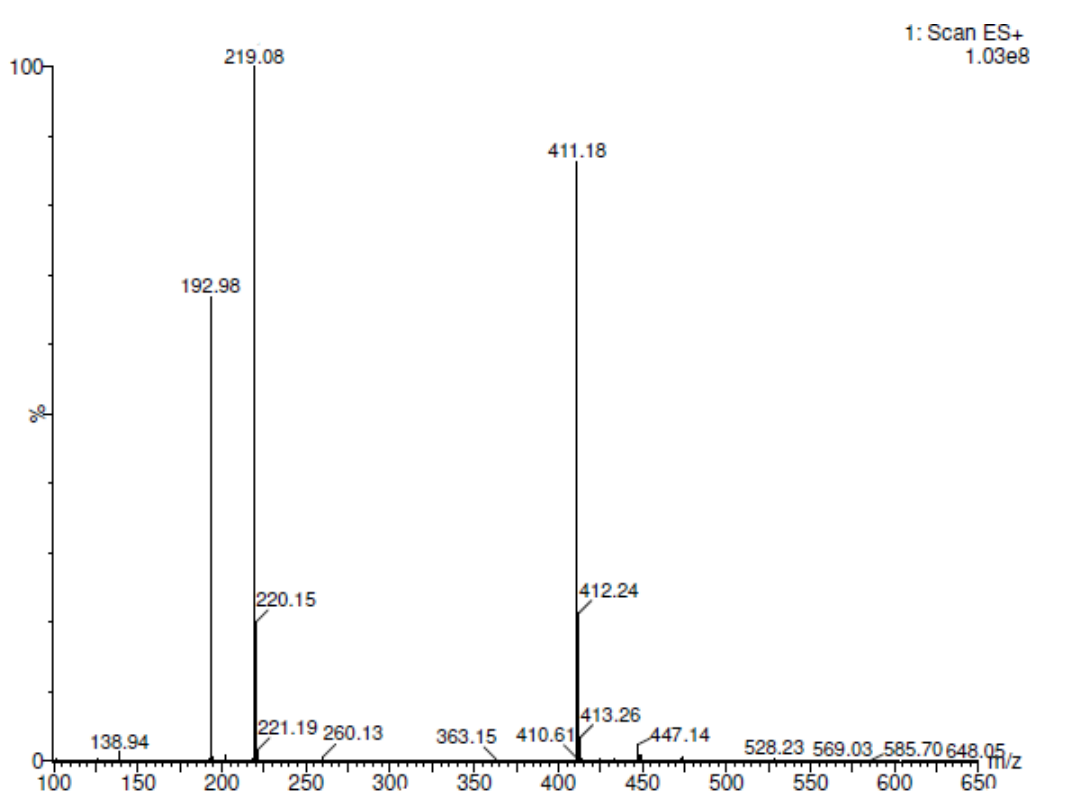

Compound 6: UPLC/MS analysis

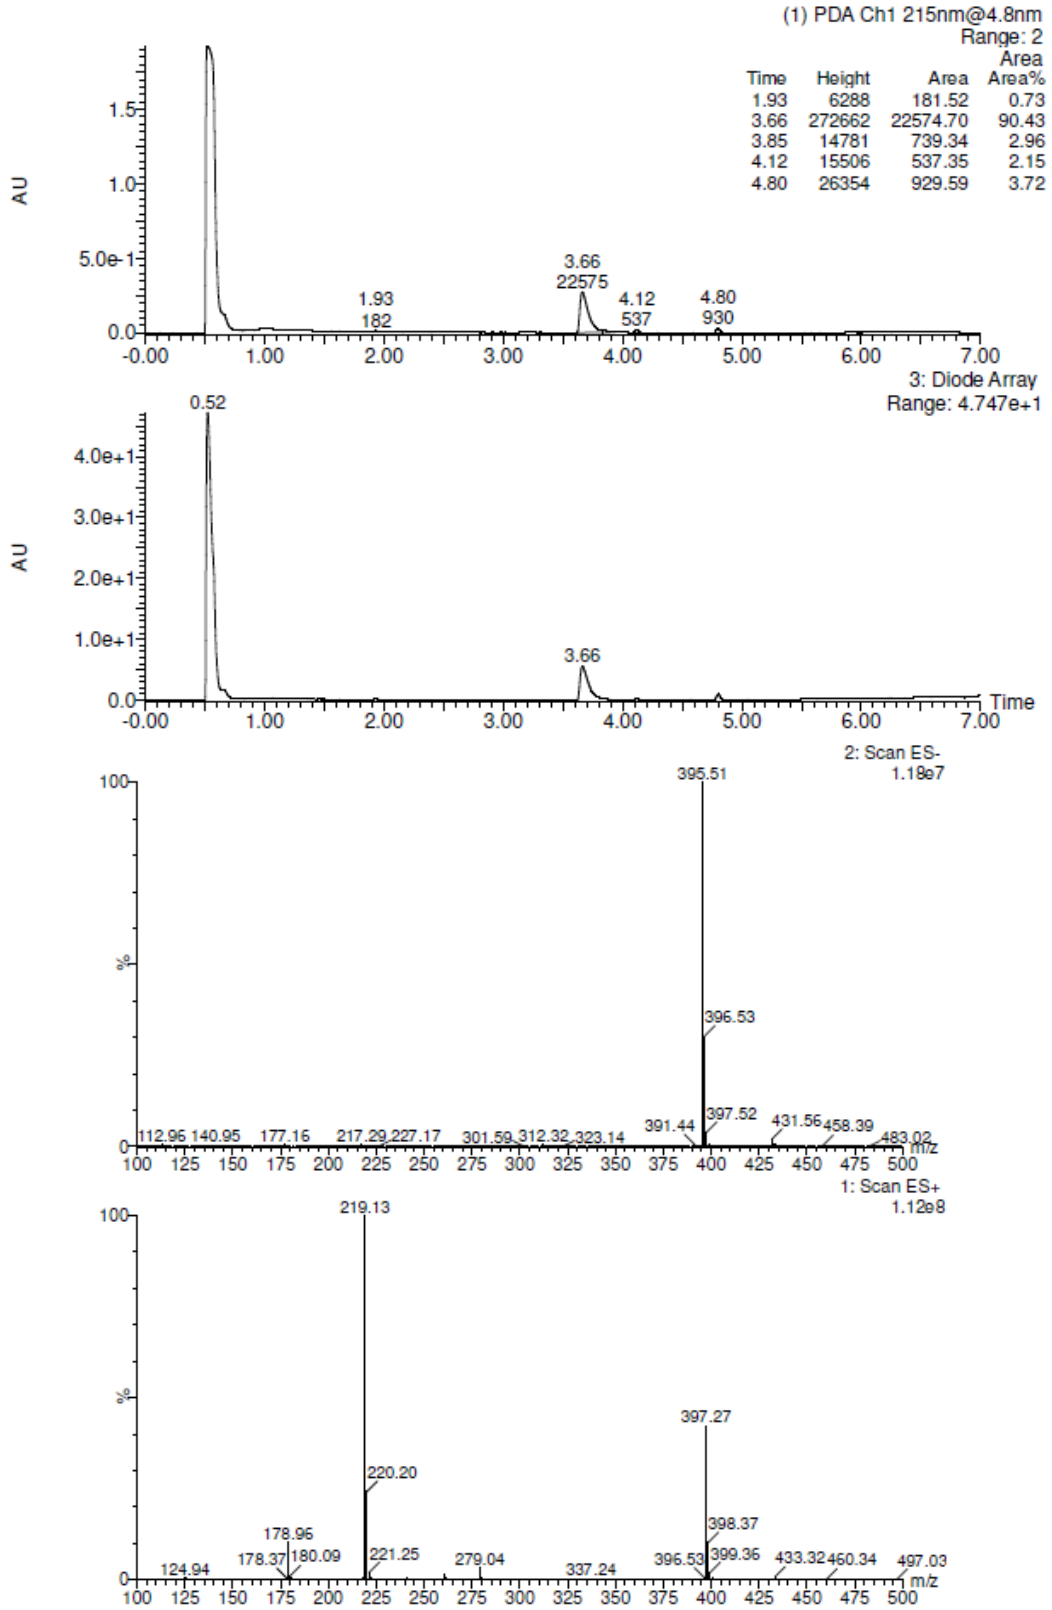

Compound 7: UPLC/MS analysis

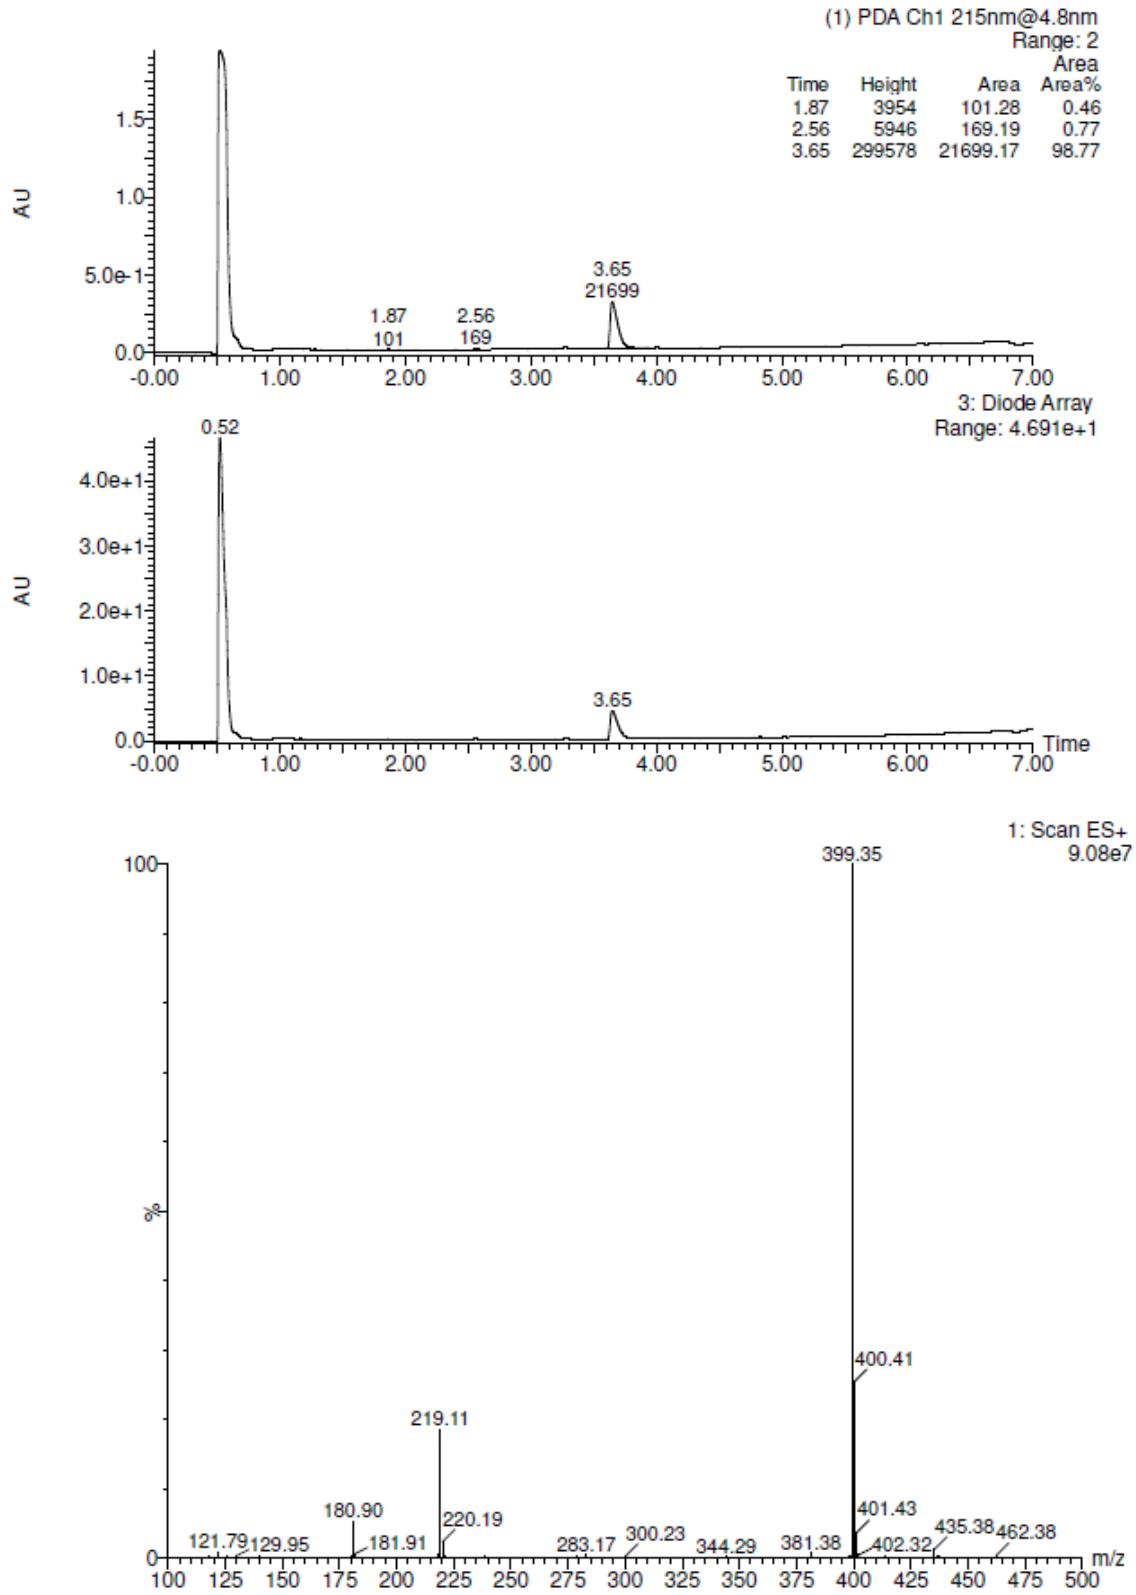

Compound 8: UPLC/MS analysis

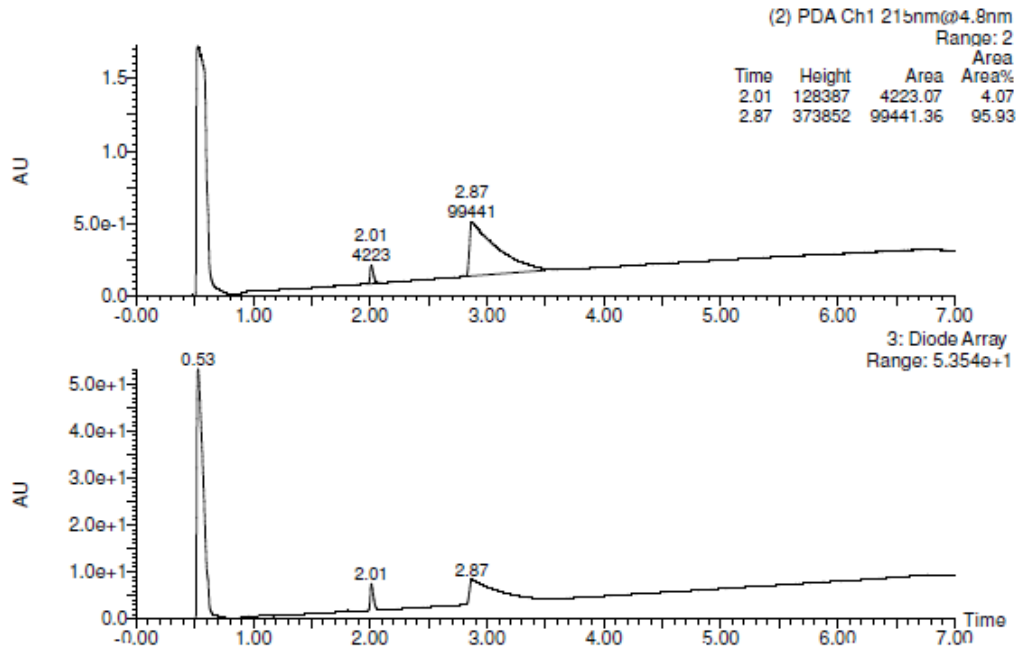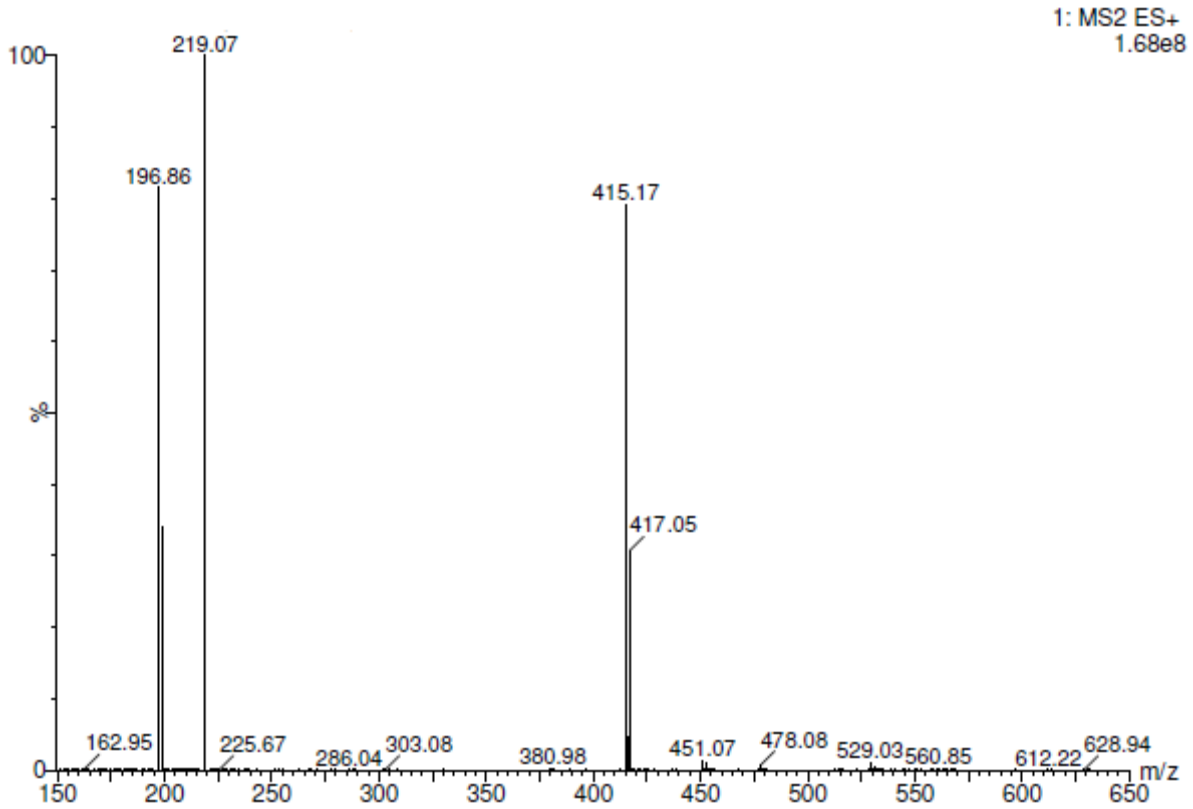

Compound 9: UPLC/MS analysis

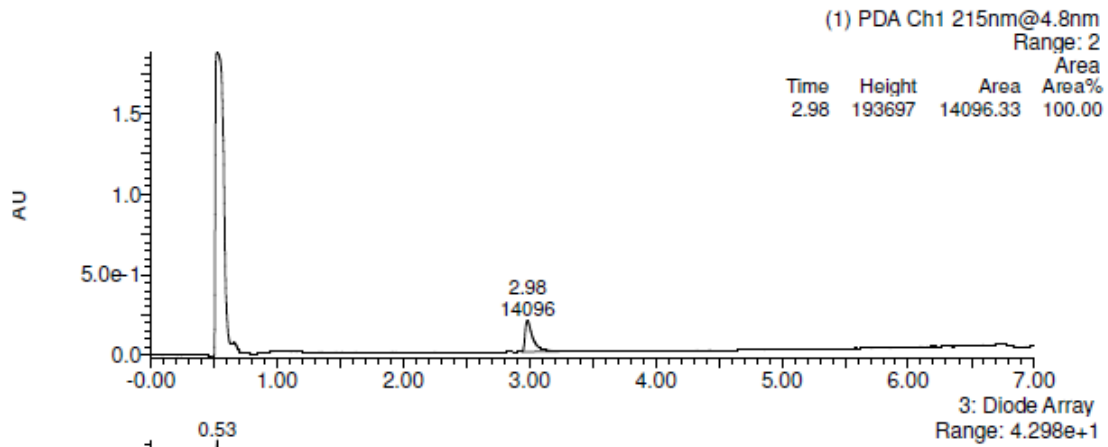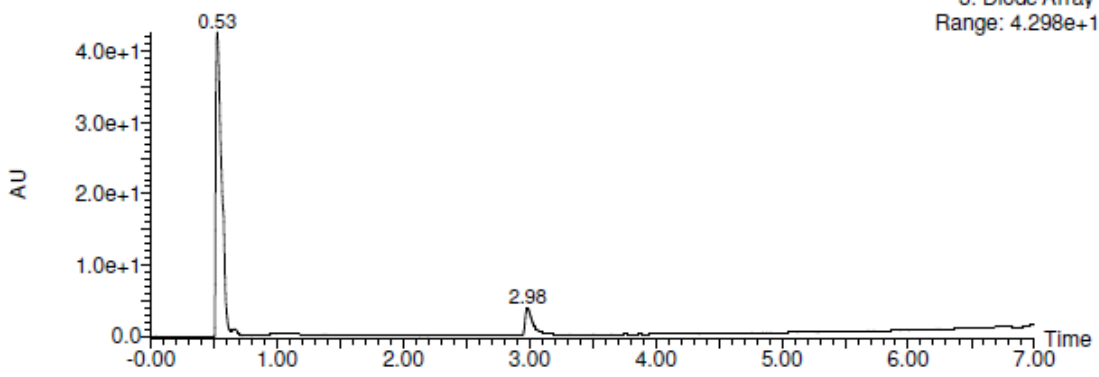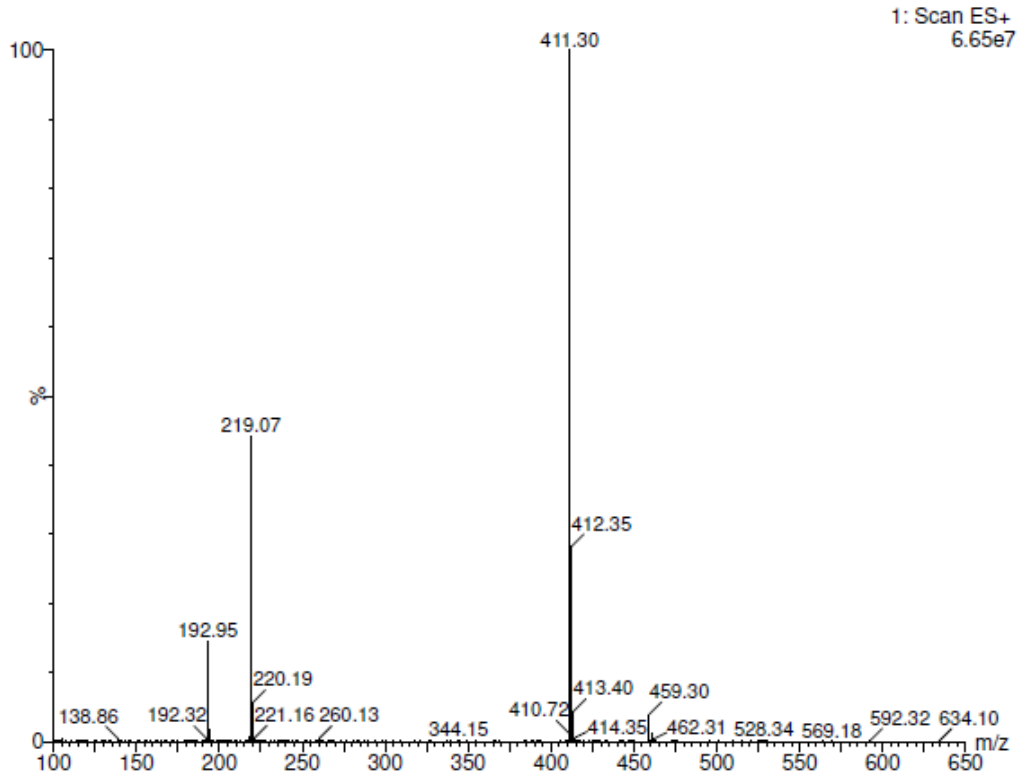



Compound **10**: UPLC/MS analysis

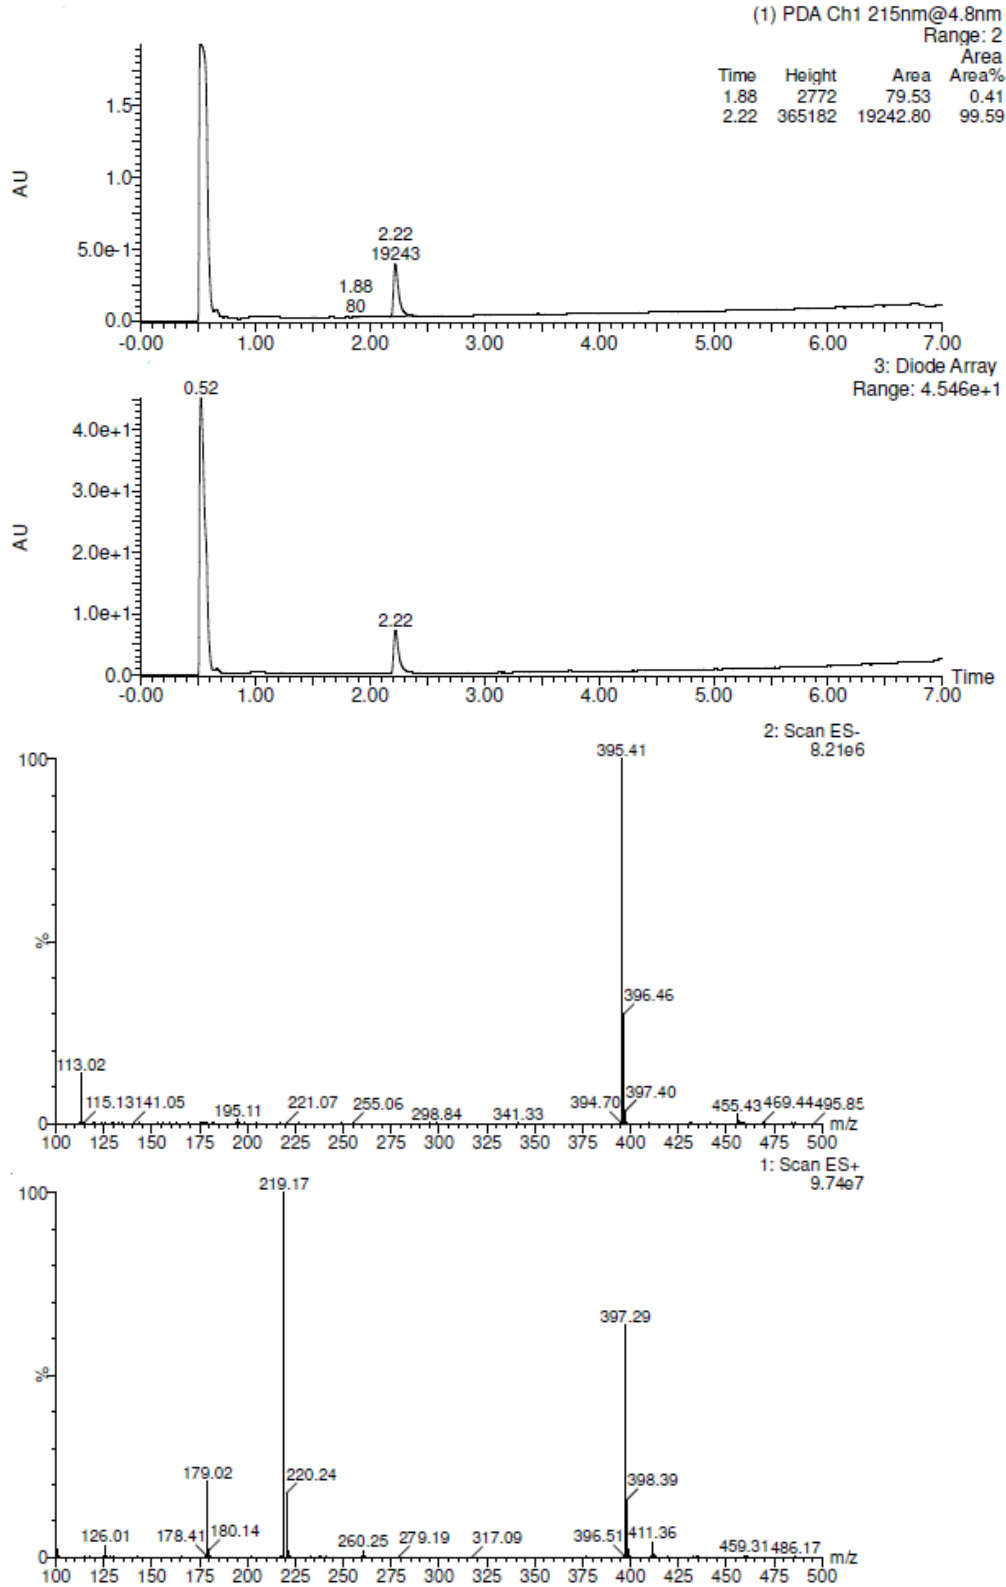

Compound 11: UPLC/MS analysis

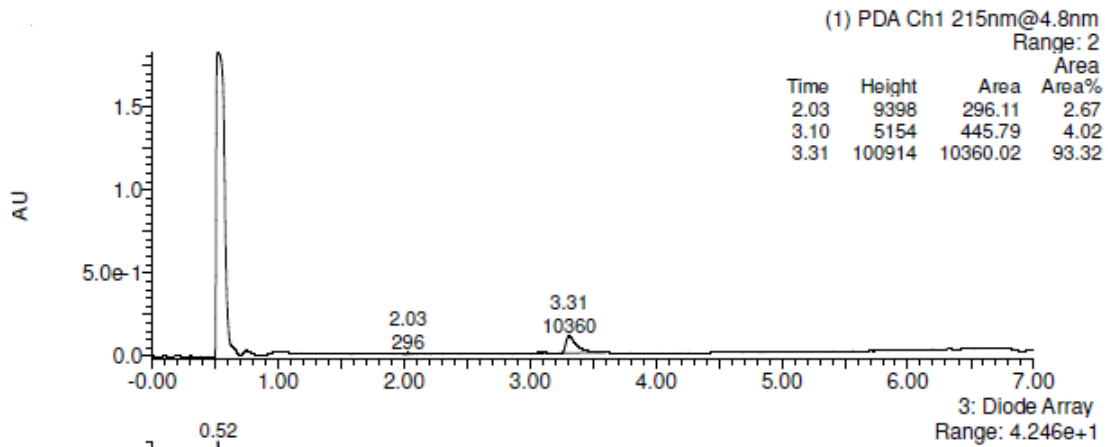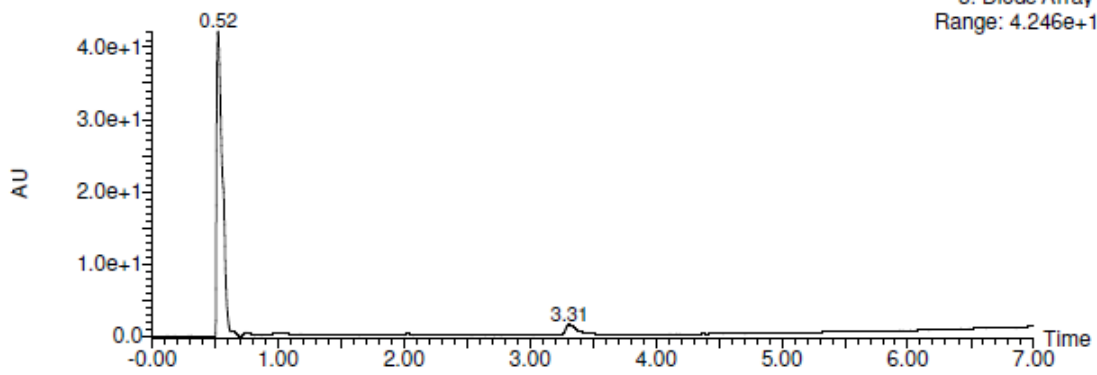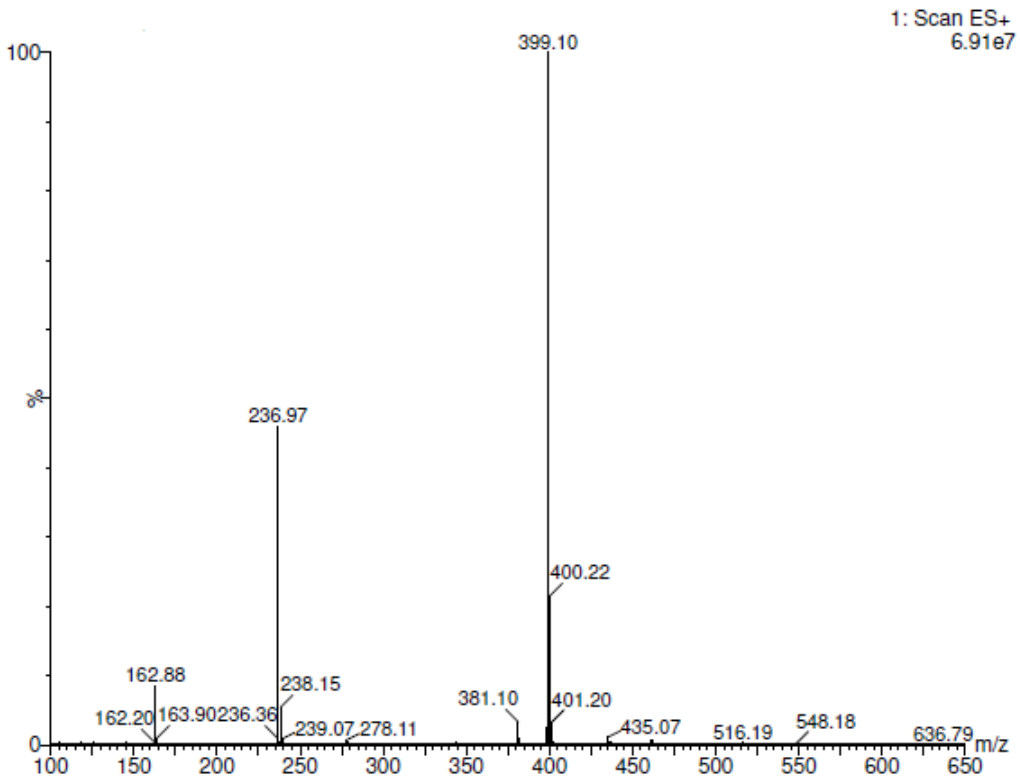

Compound 12: UPLC/MS analysis

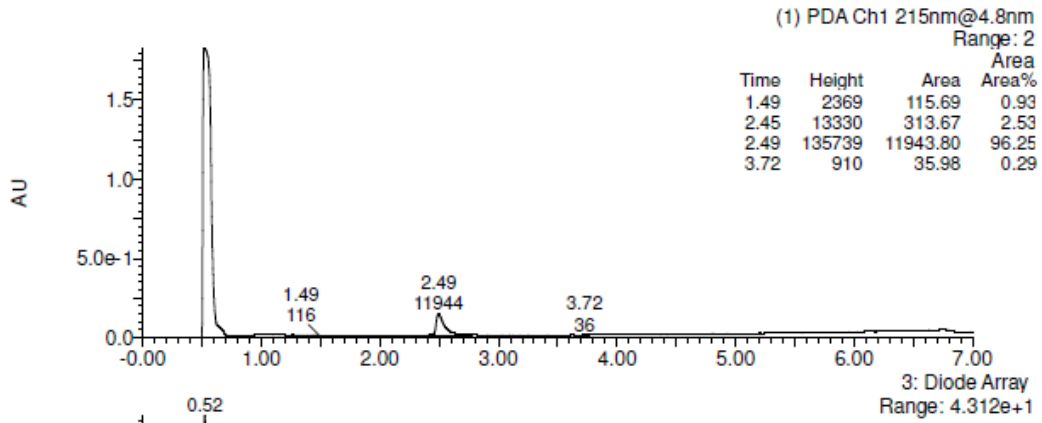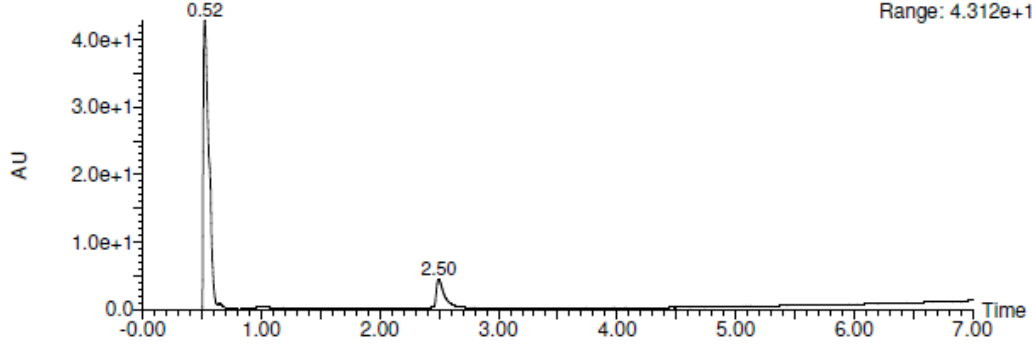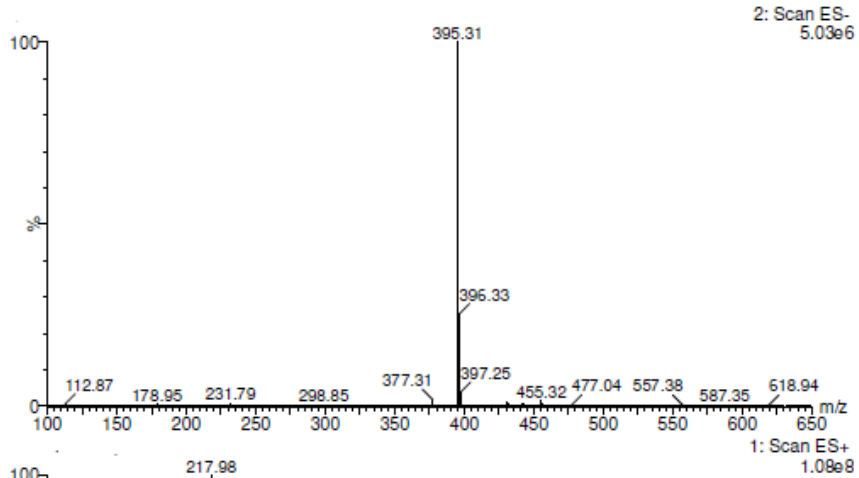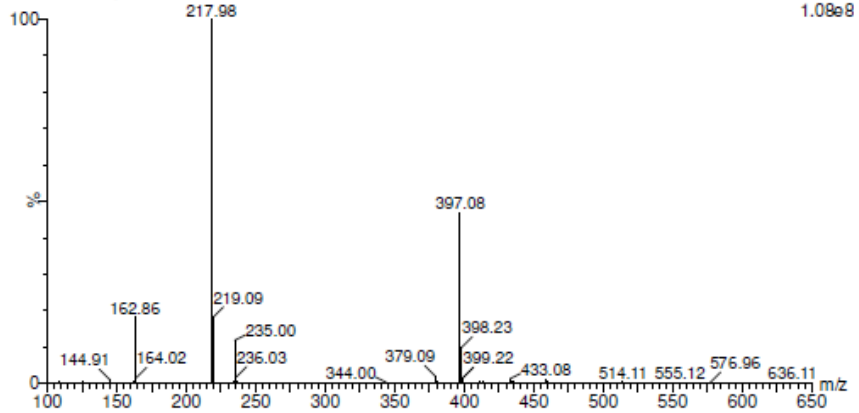

Compound 13: UPLC/MS analysis

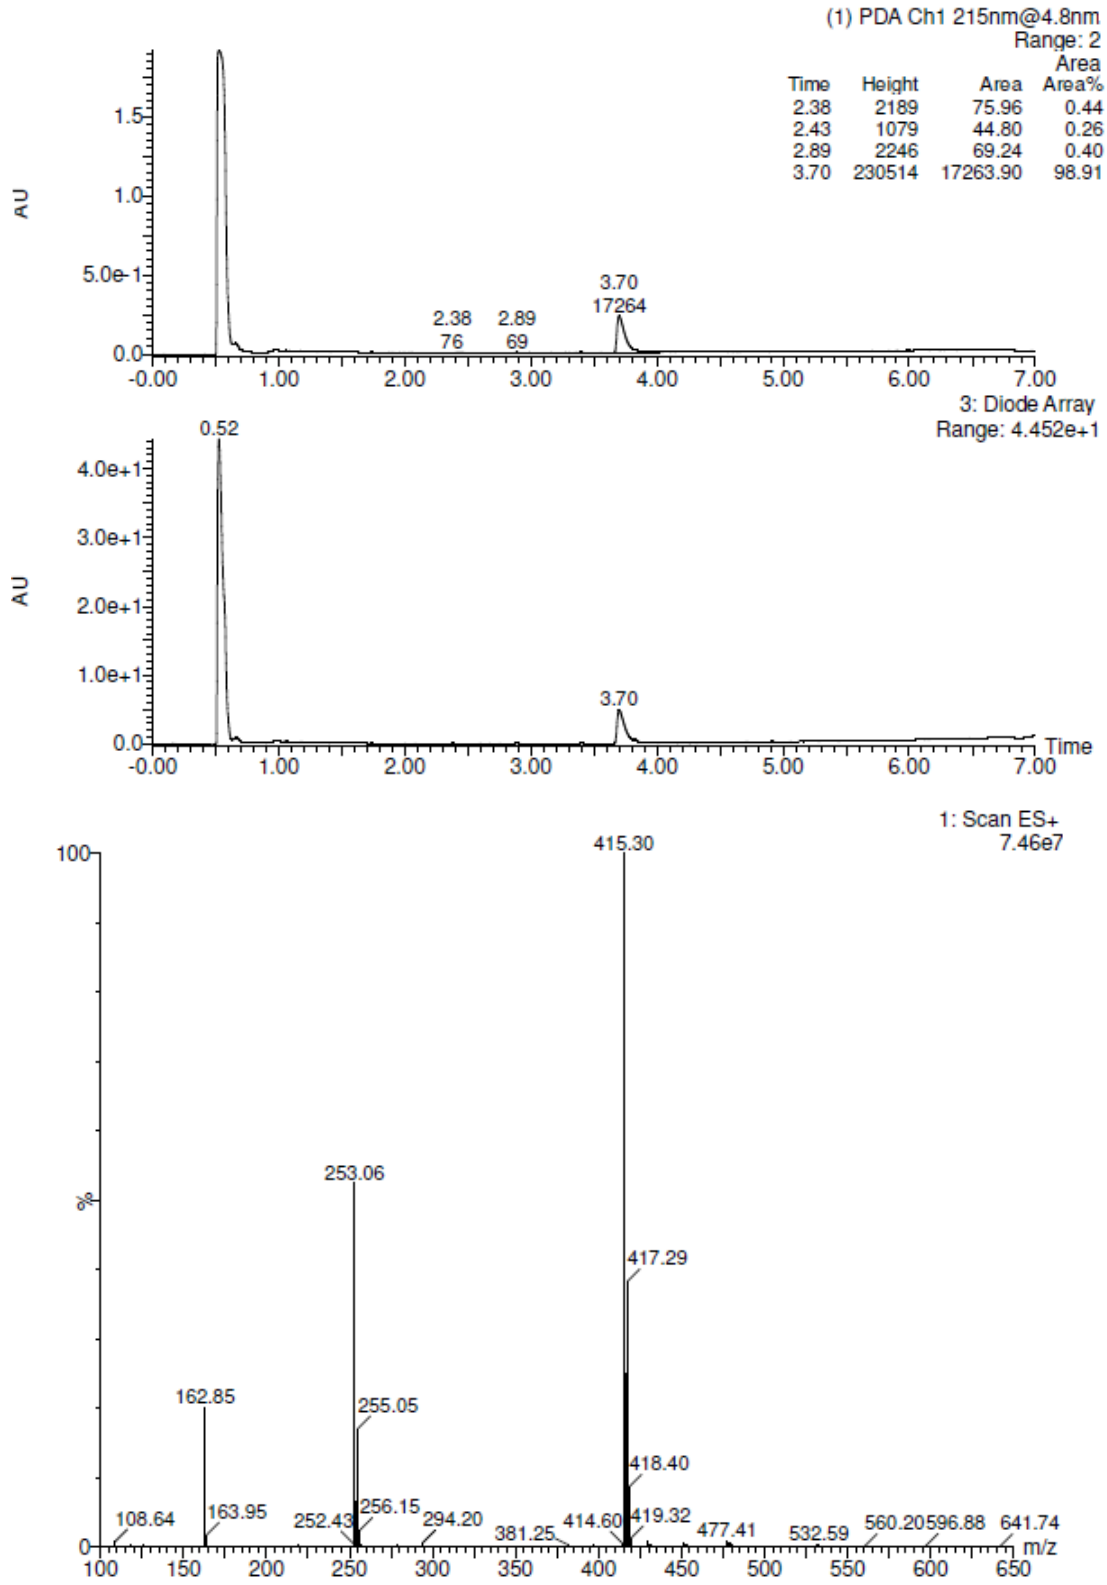

Compound 14: UPLC/MS analysis

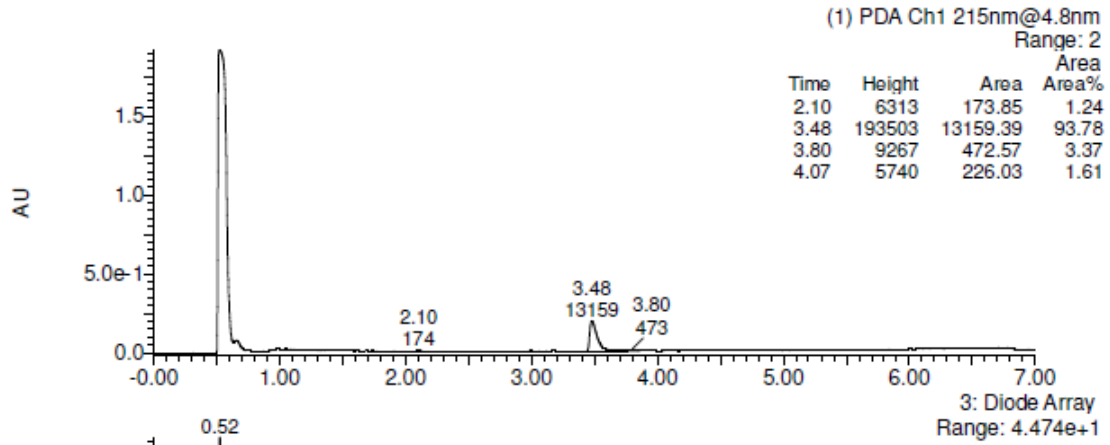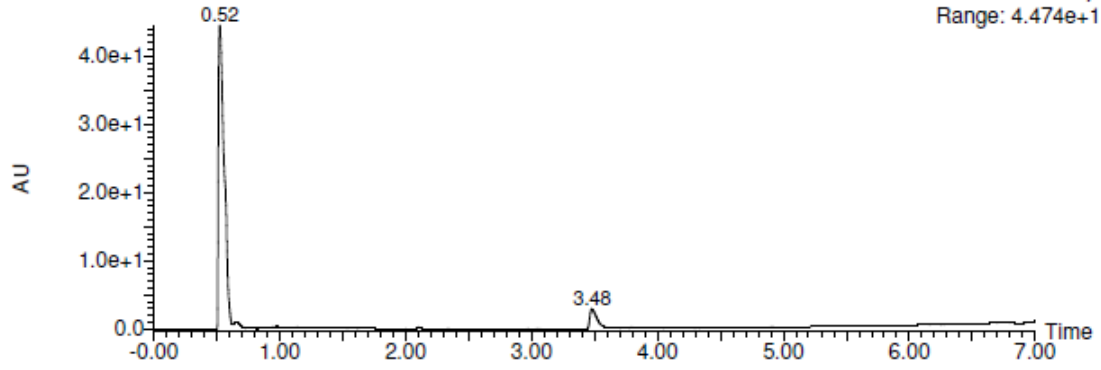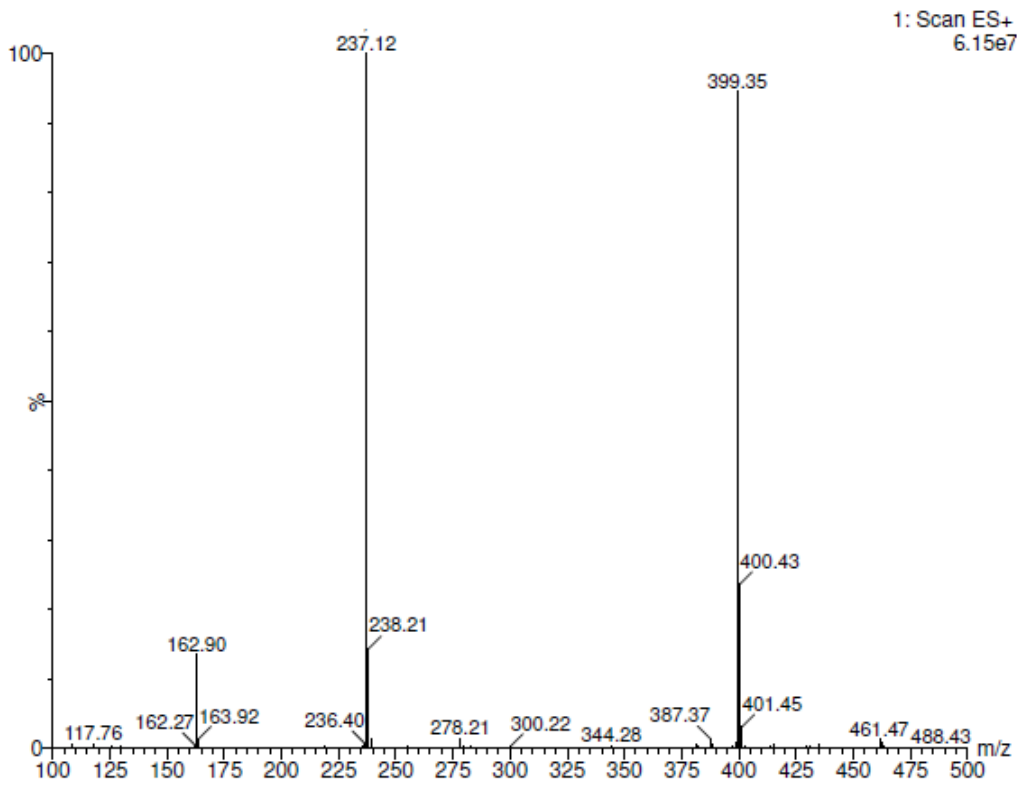

Compound **15**: UPLC/MS analysis

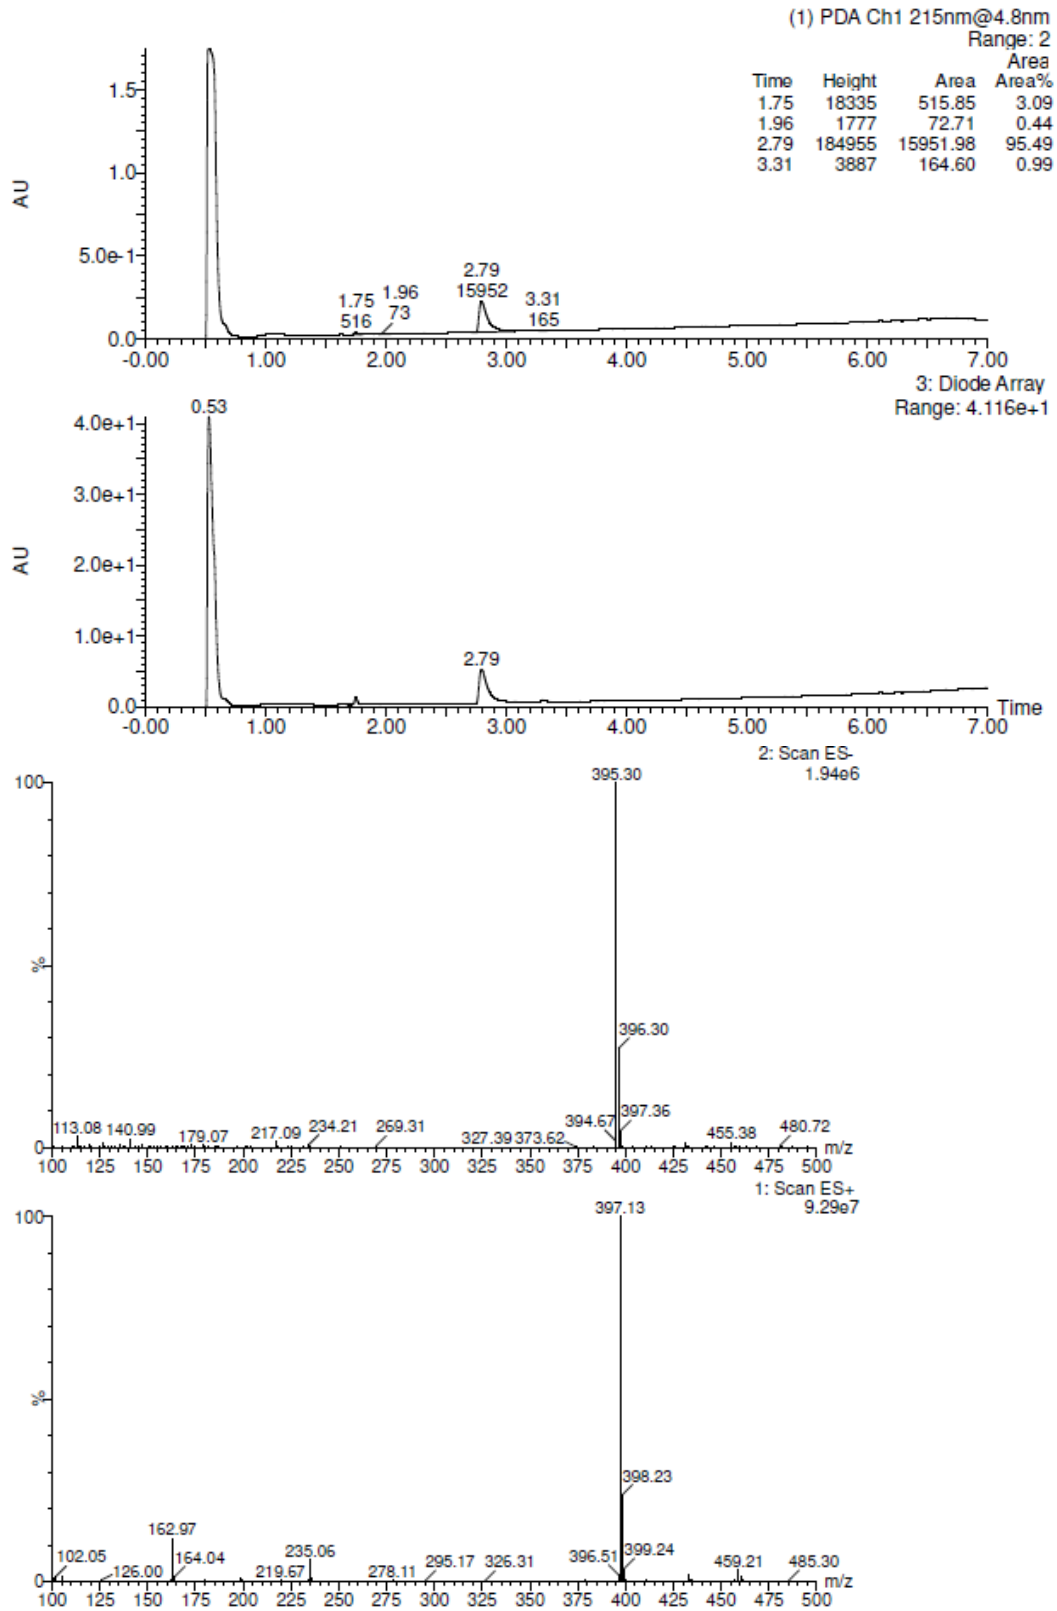

Compound **16**: UPLC/MS analysis

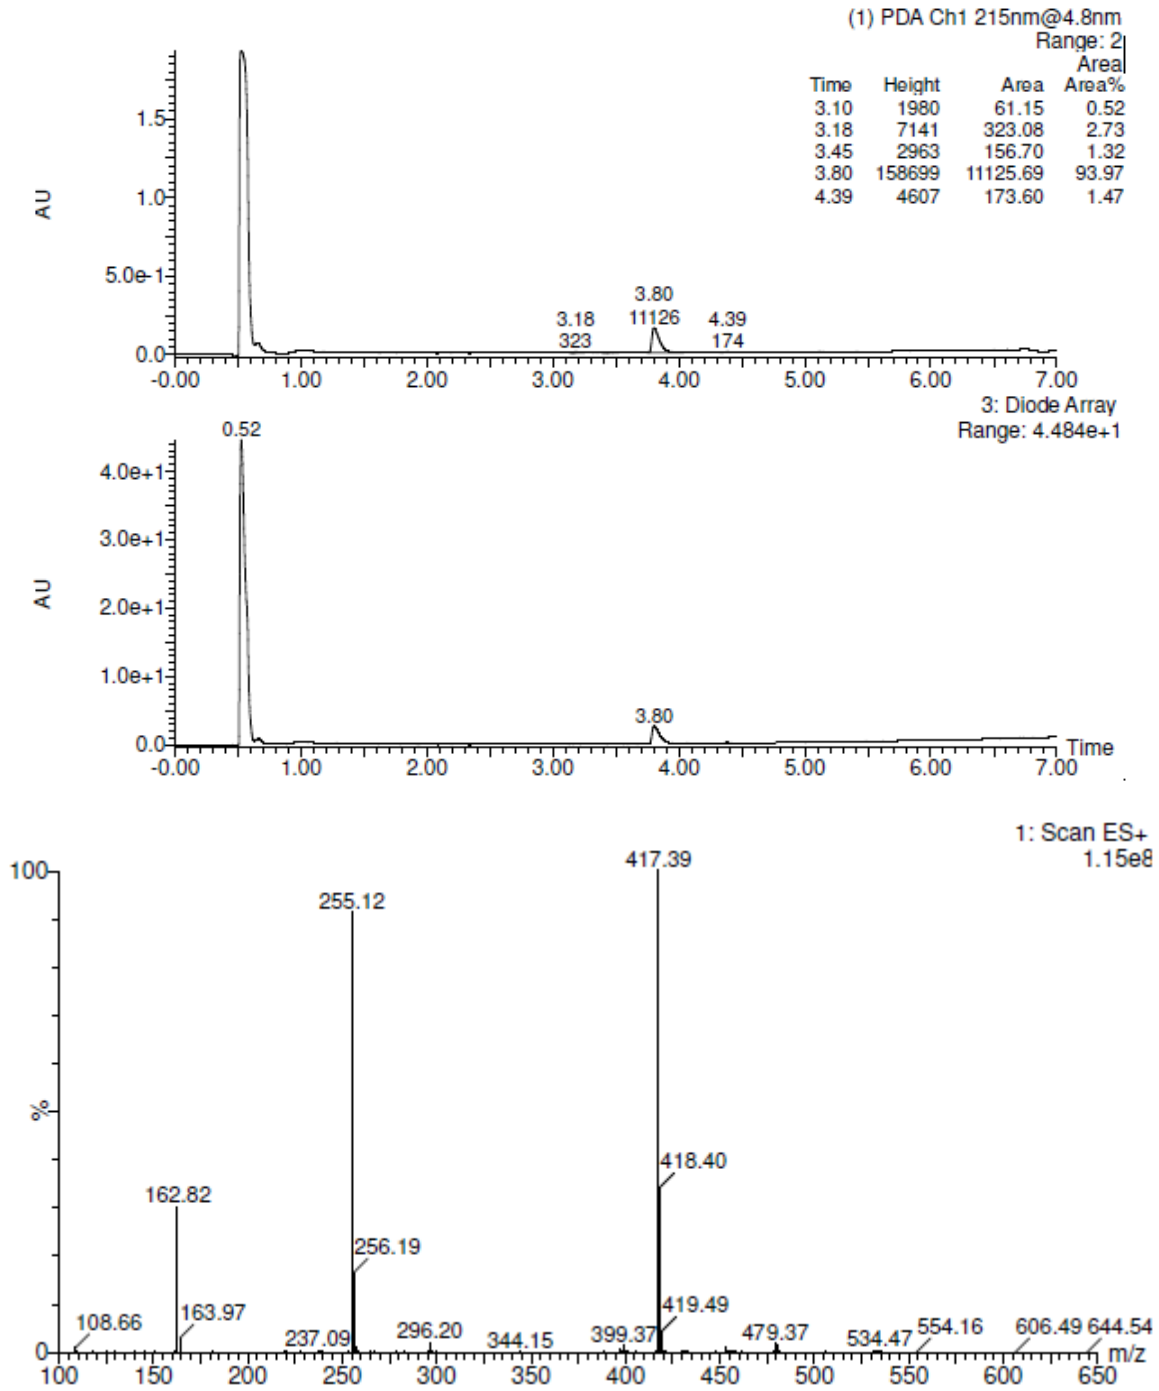

Compound 17: UPLC/MS analysis

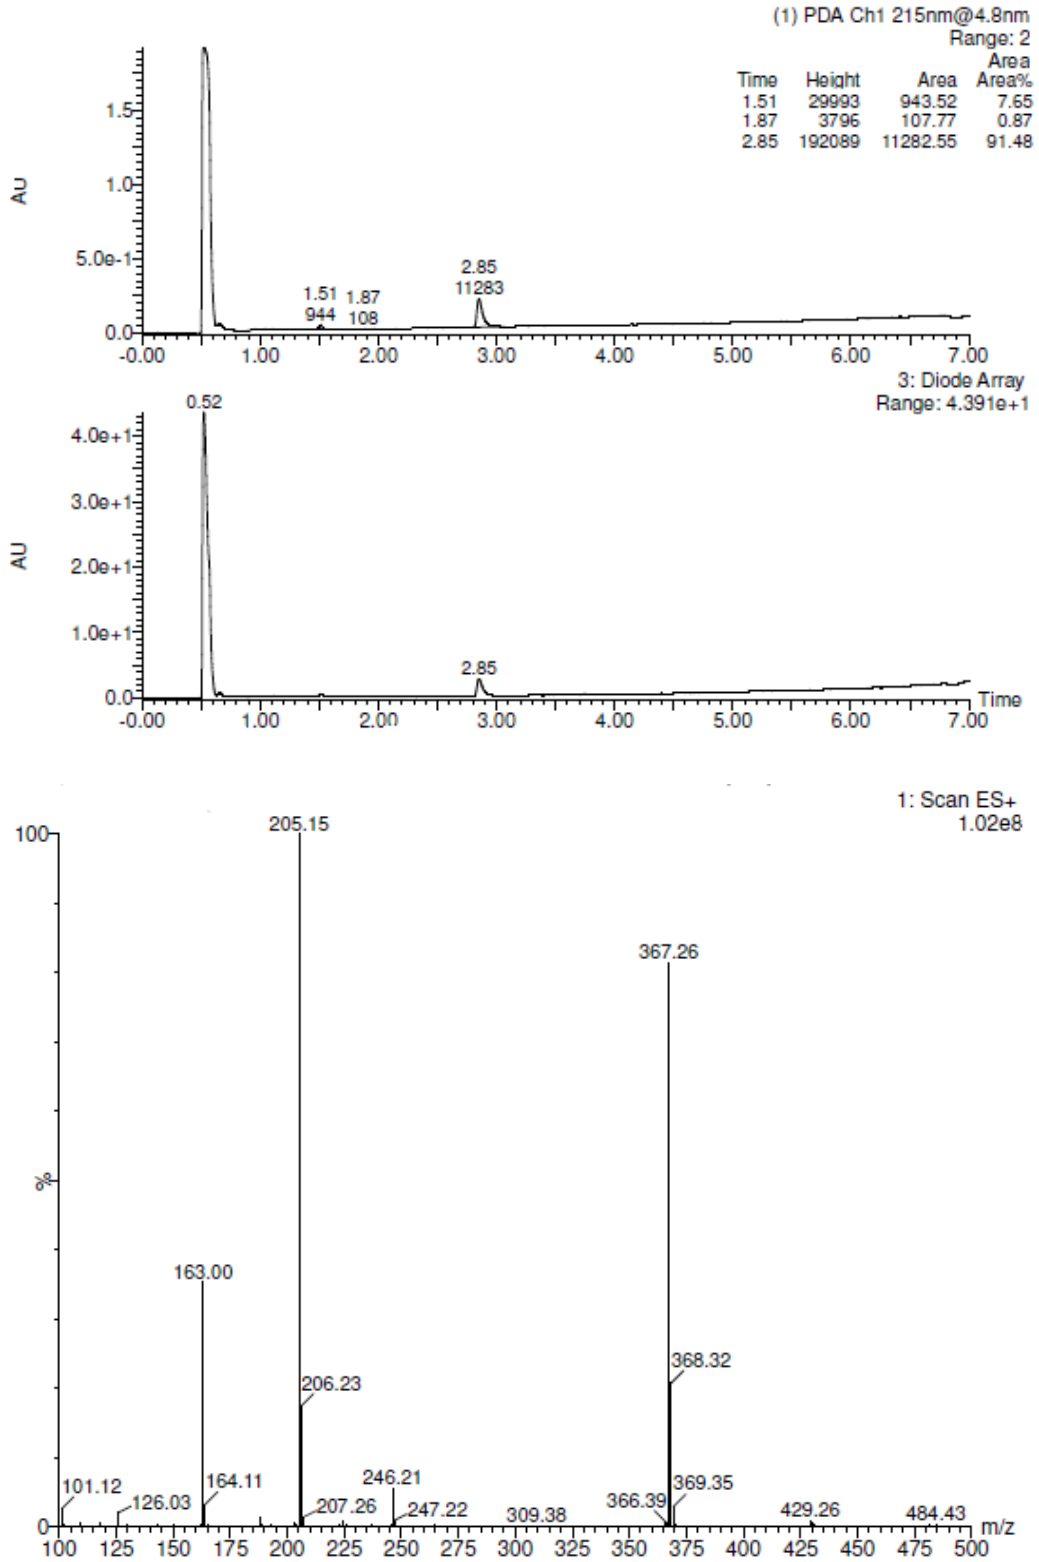



Compound 18: UPLC/MS analysis

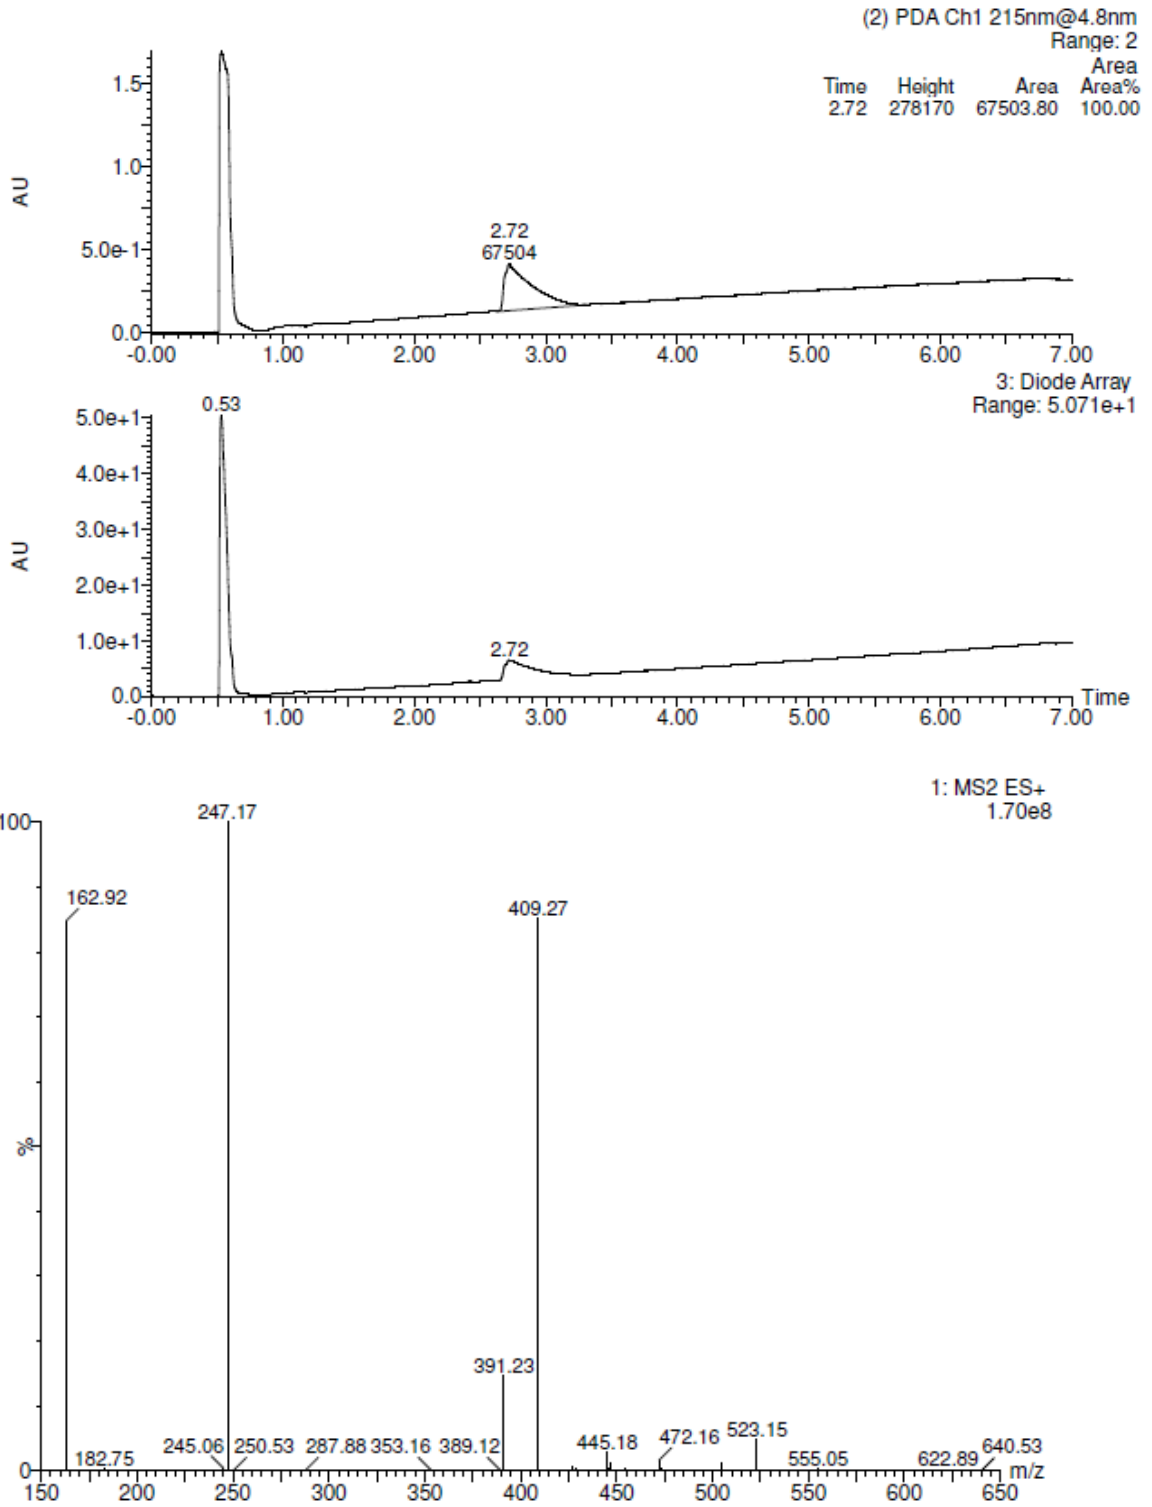

Compound 19: UPLC/MS analysis

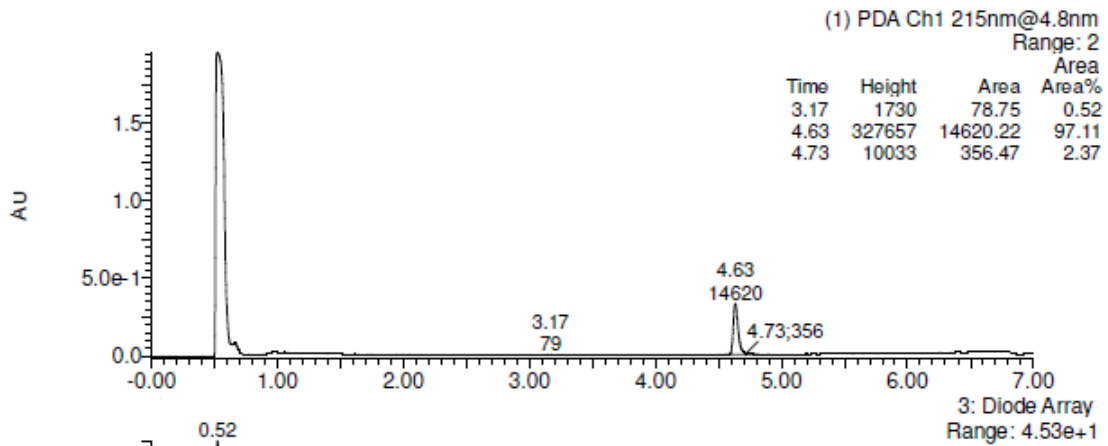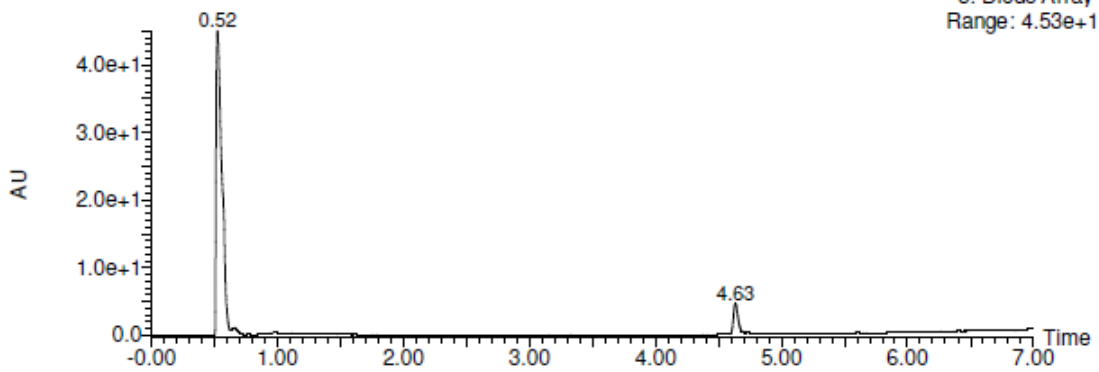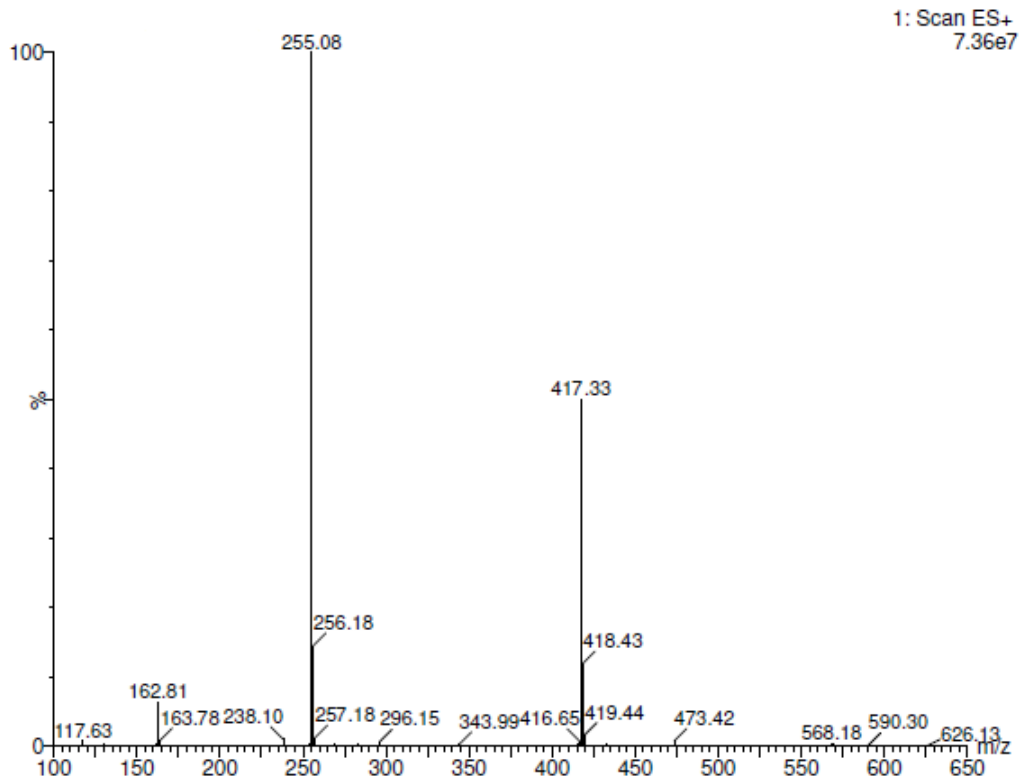

Compound 20: UPLC/MS analysis

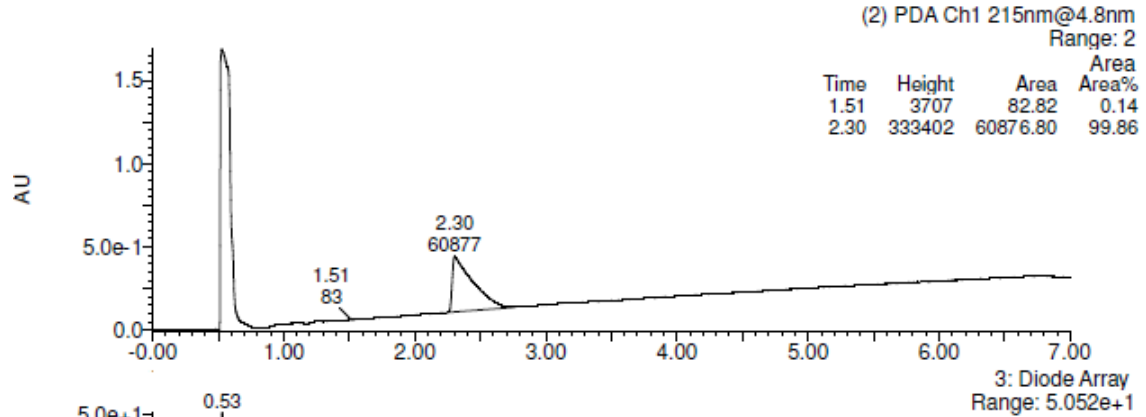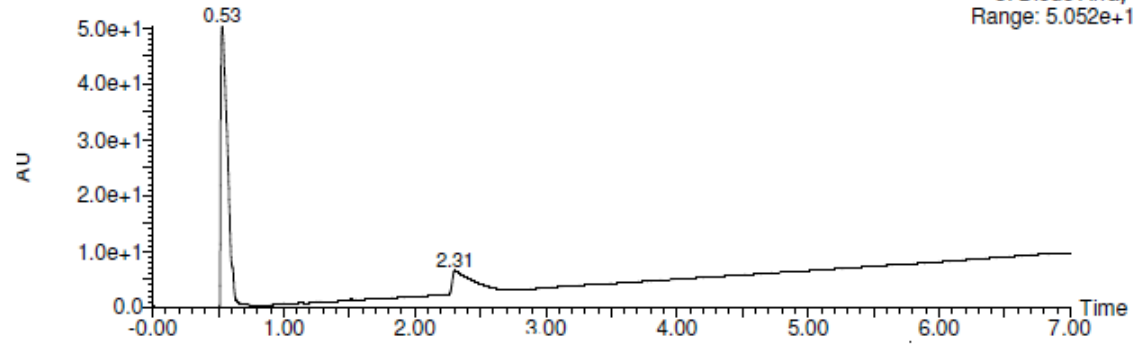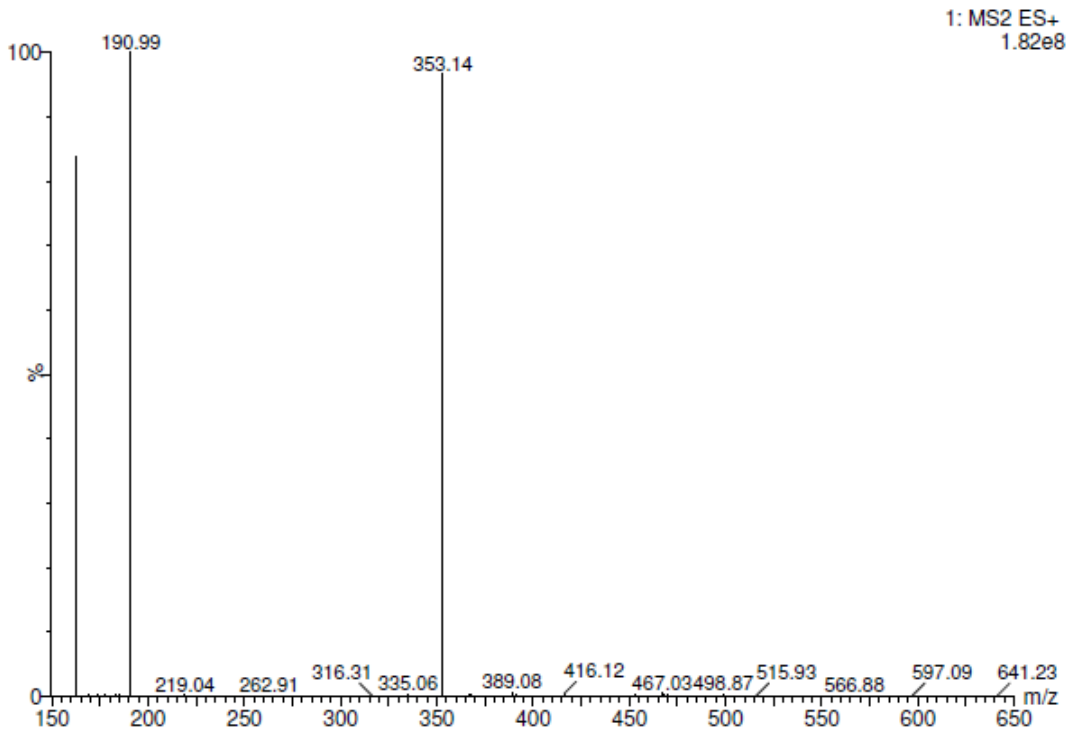

Compound **21**: UPLC/MS analysis

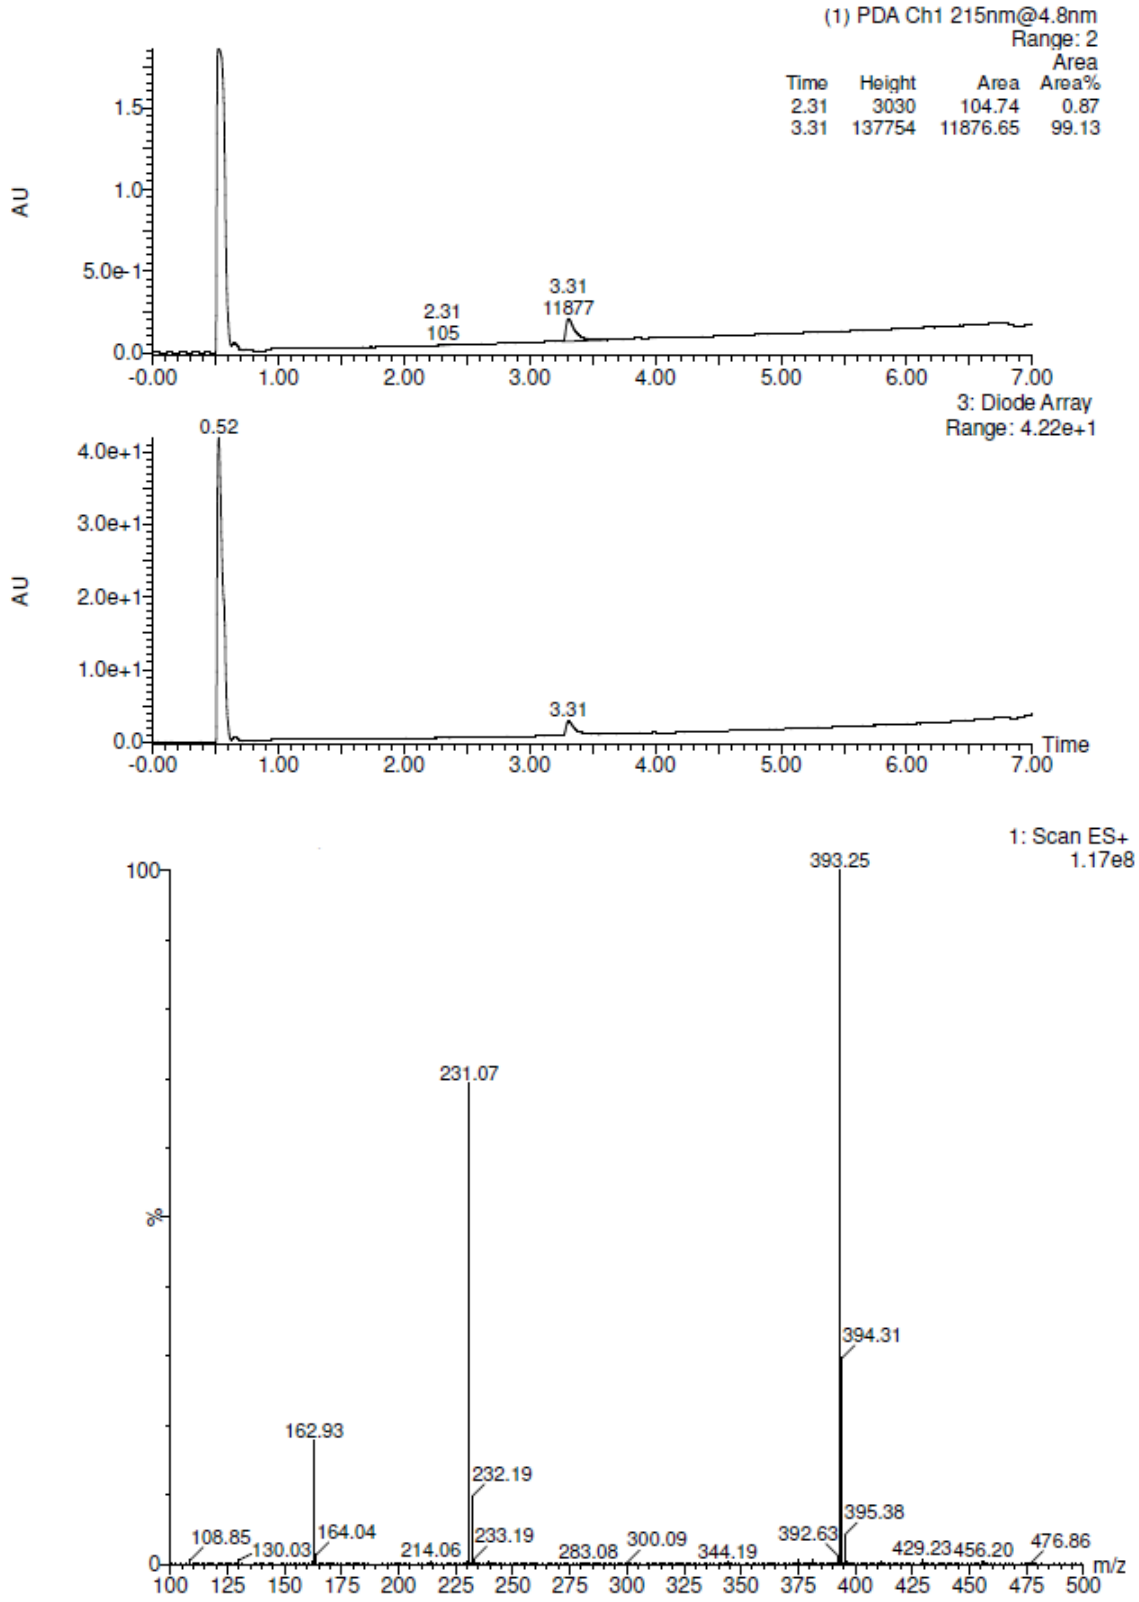

Compound 22: UPLC/MS analysis

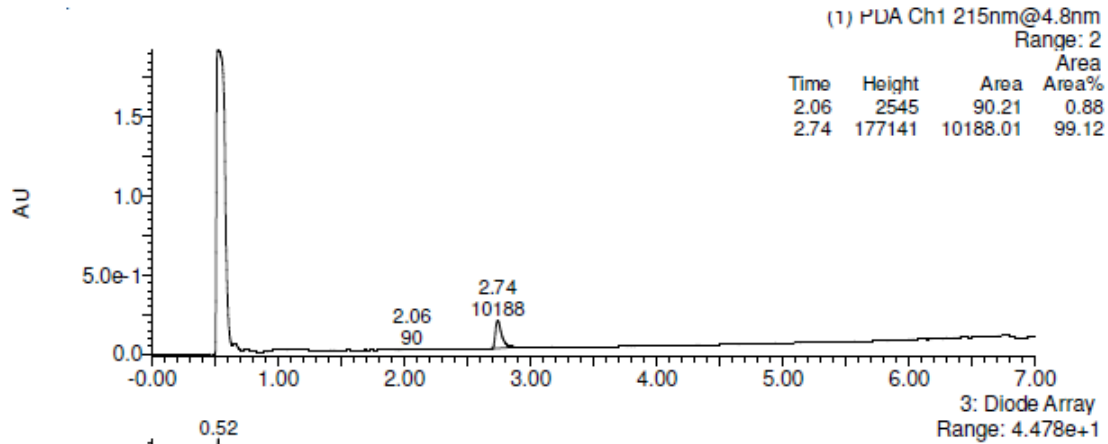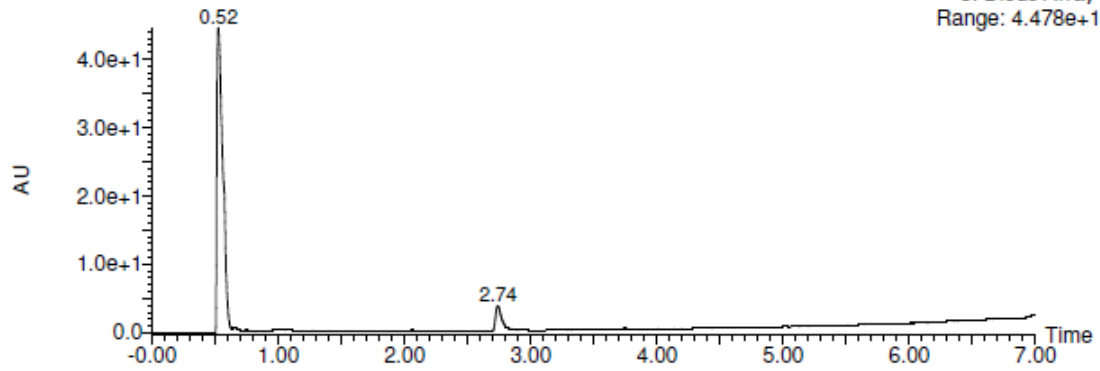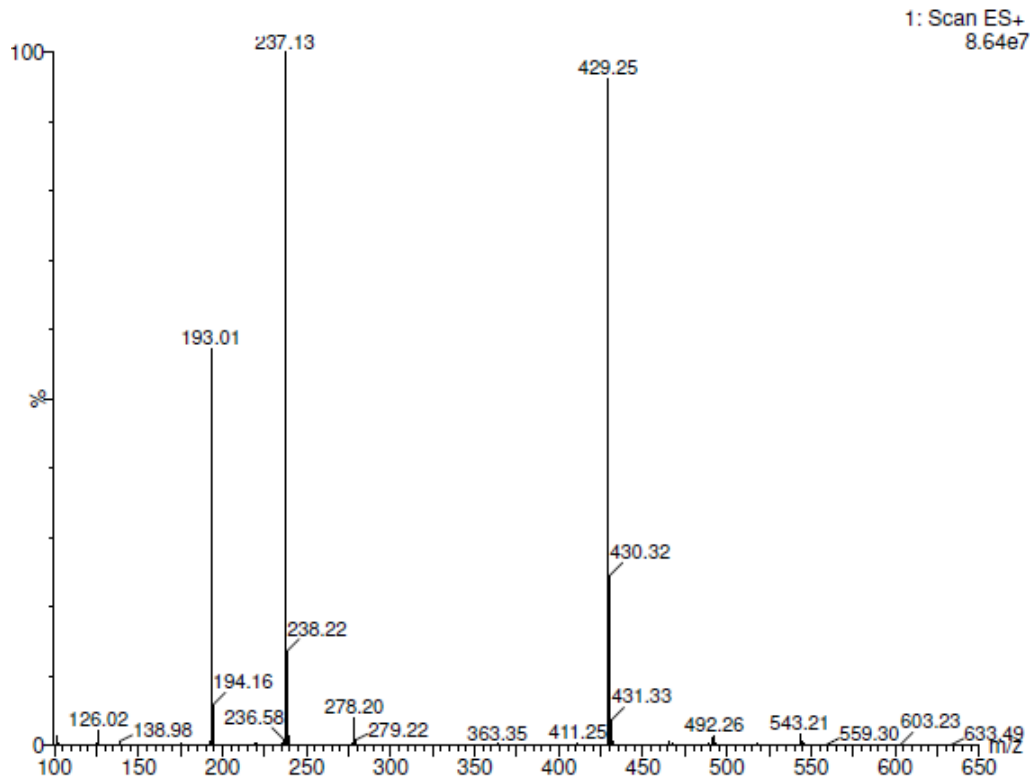

Compound 23: UPLC/MS analysis

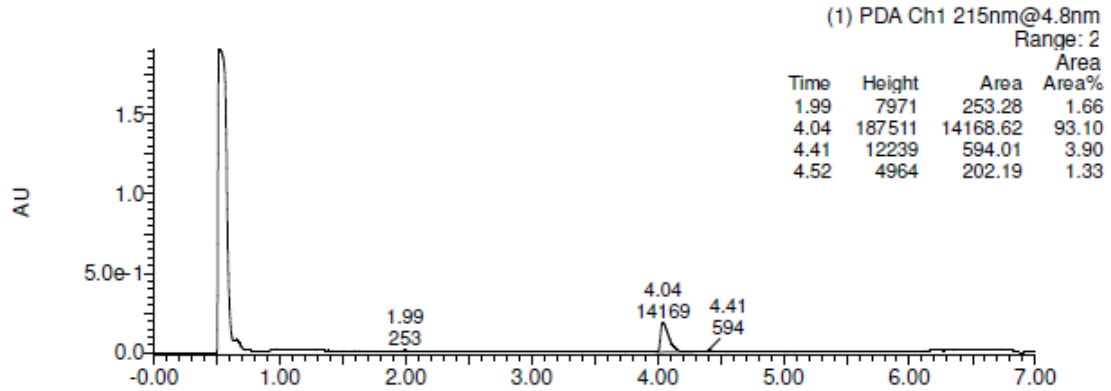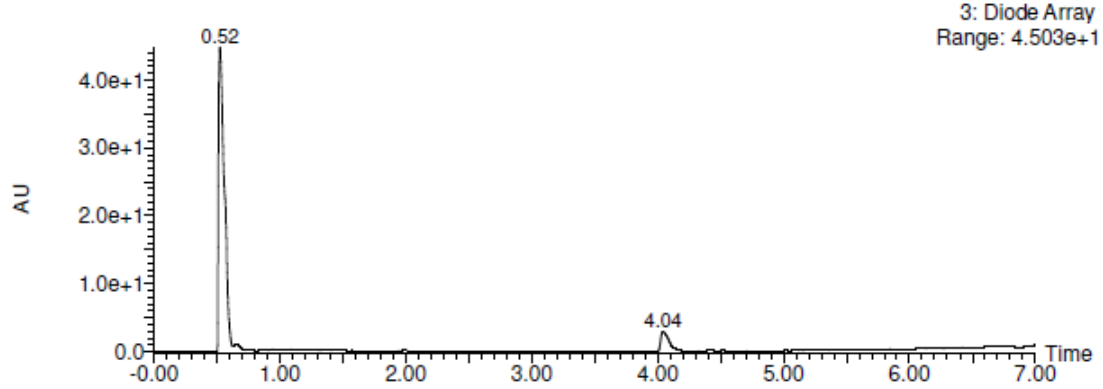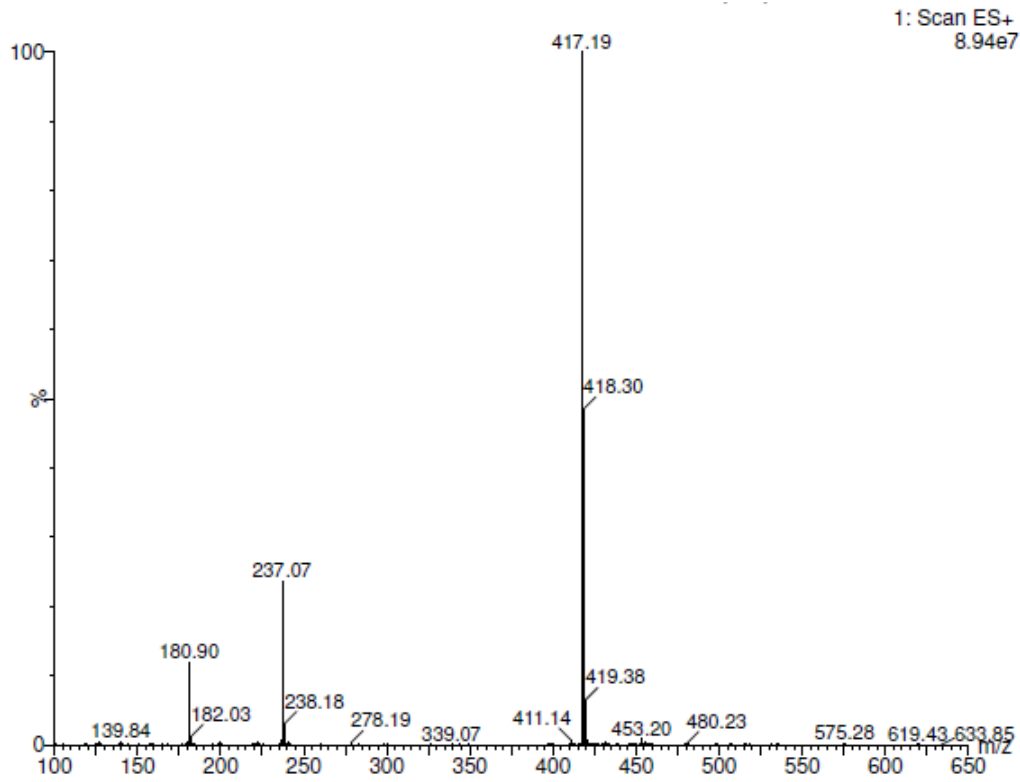

Compound 24: UPLC/MS analysis

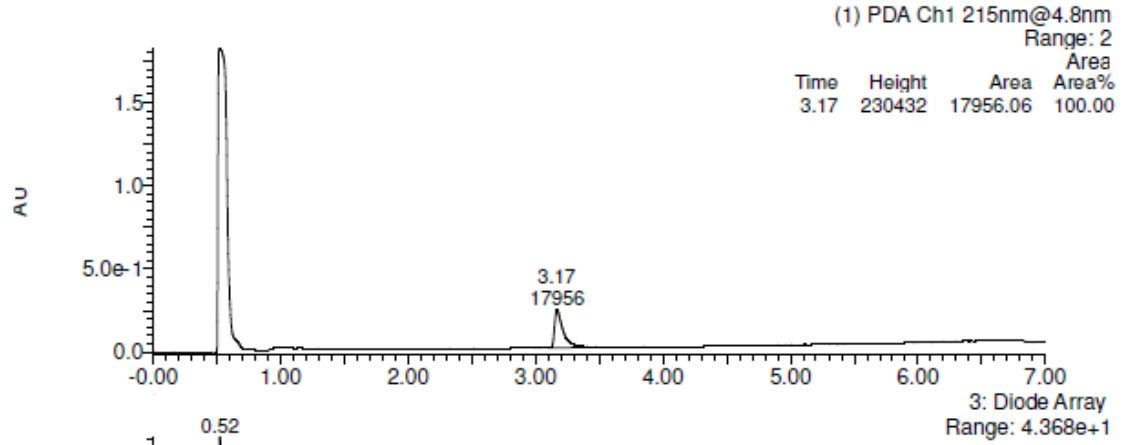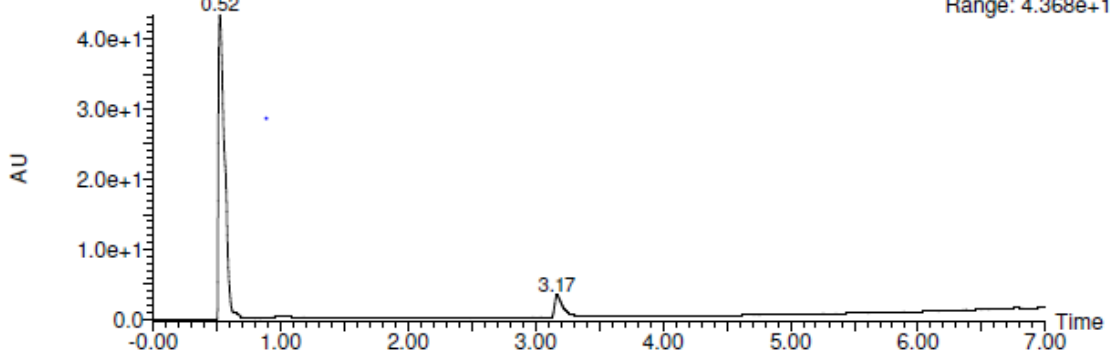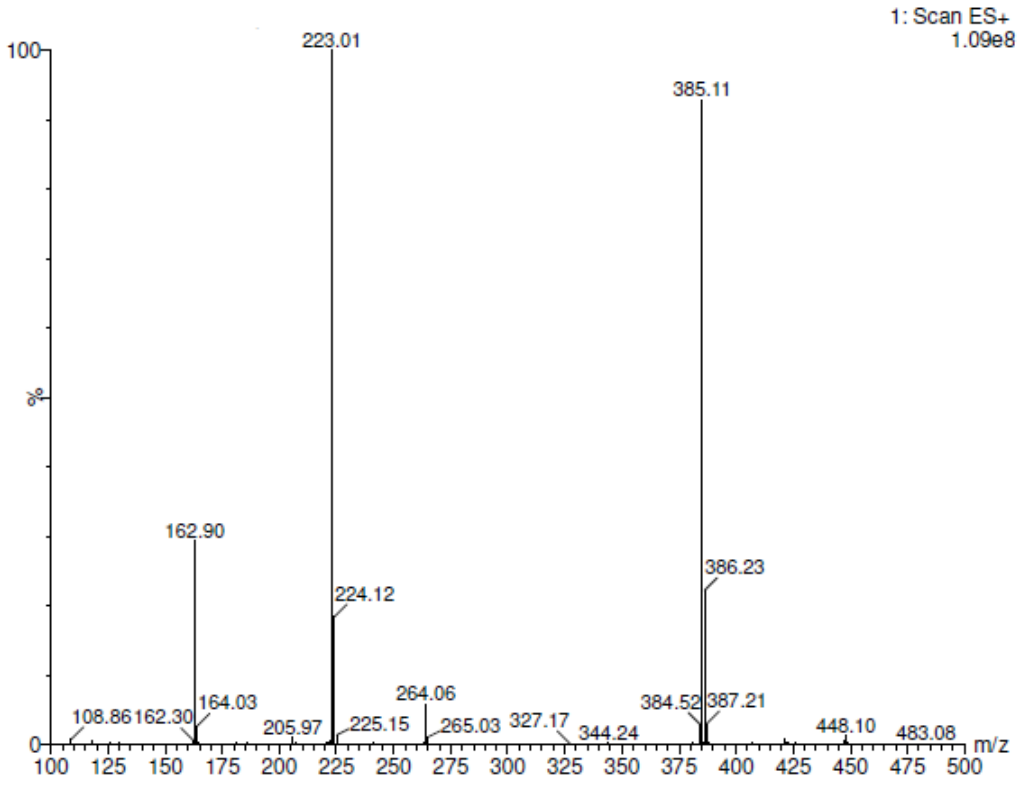

Compound 25: UPLC/MS analysis

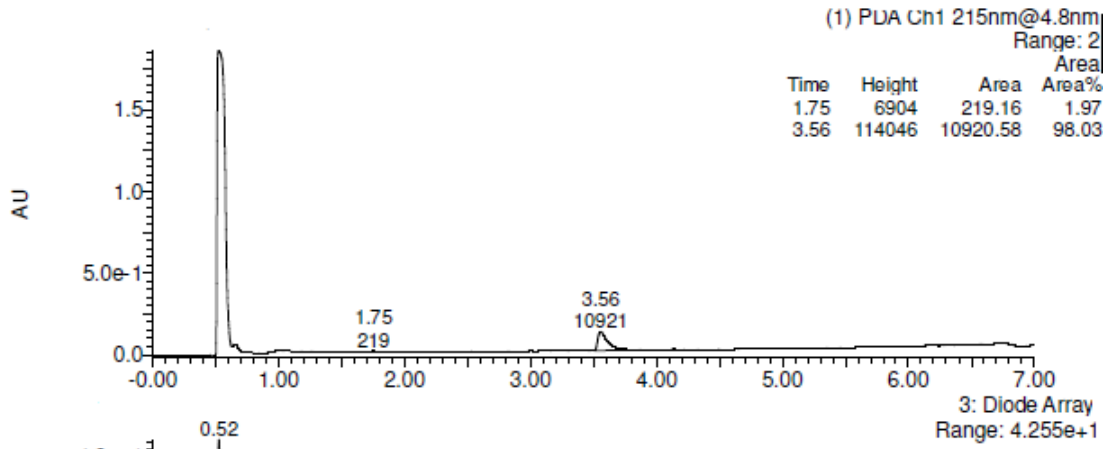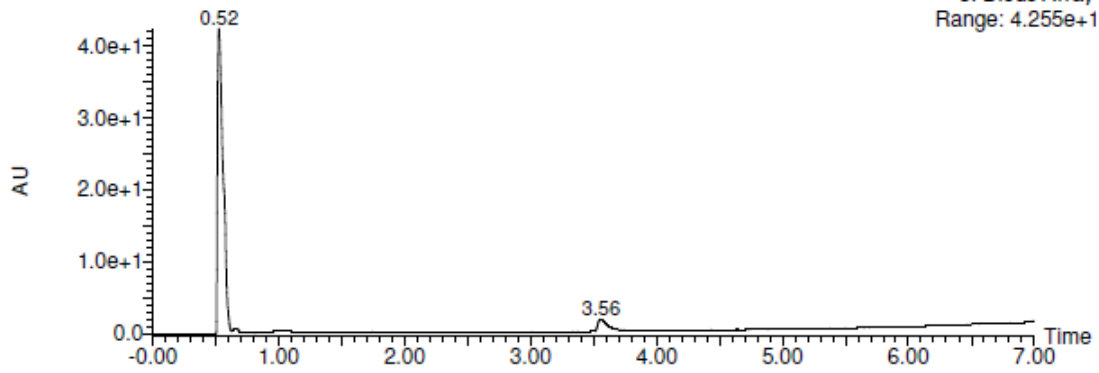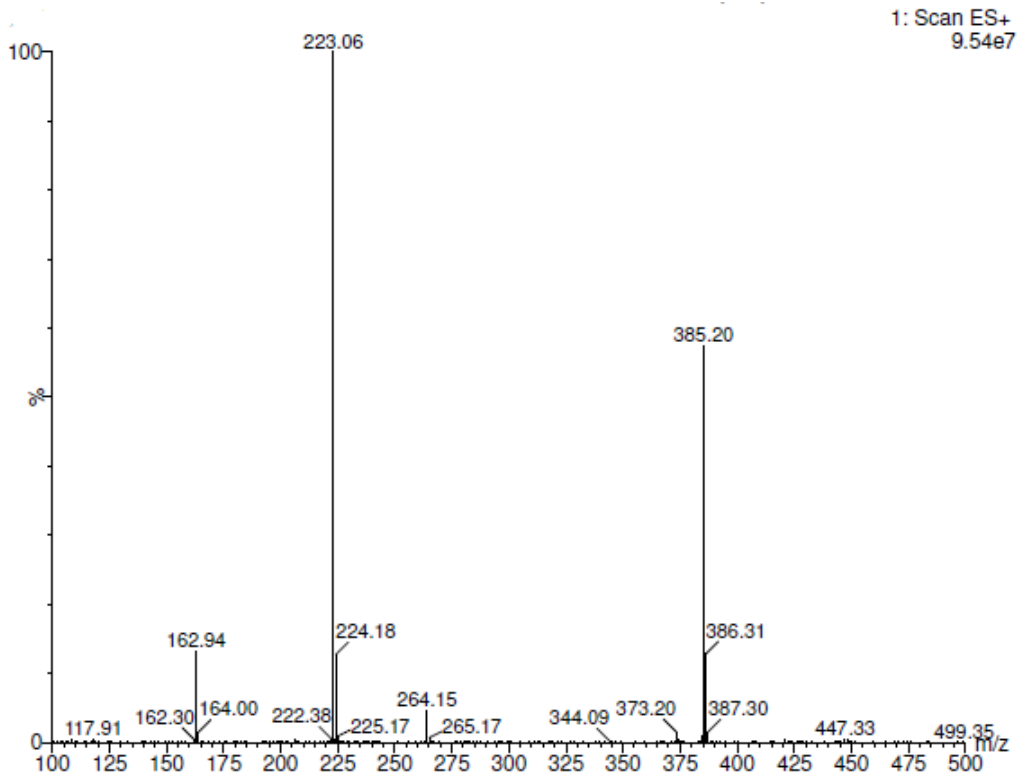



Compound **26**: UPLC/MS analysis

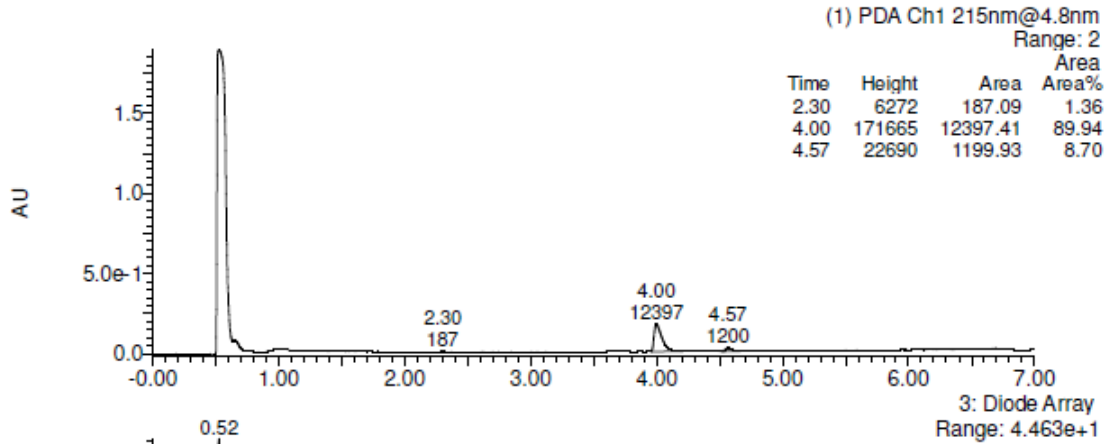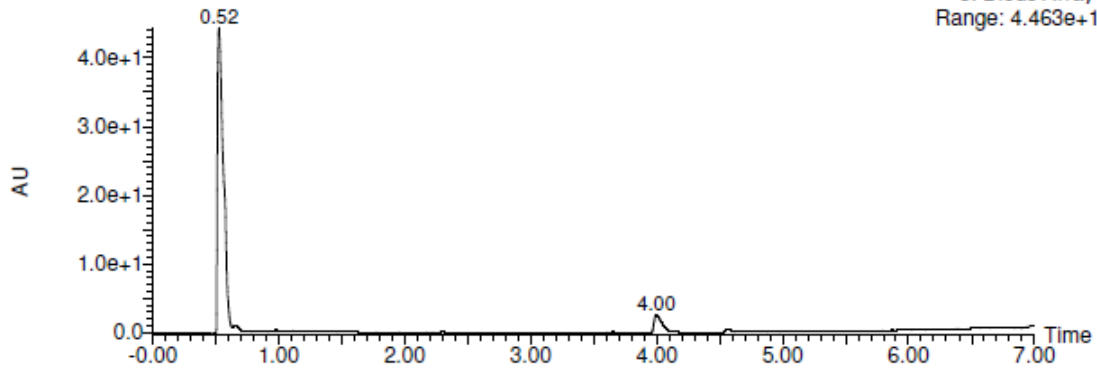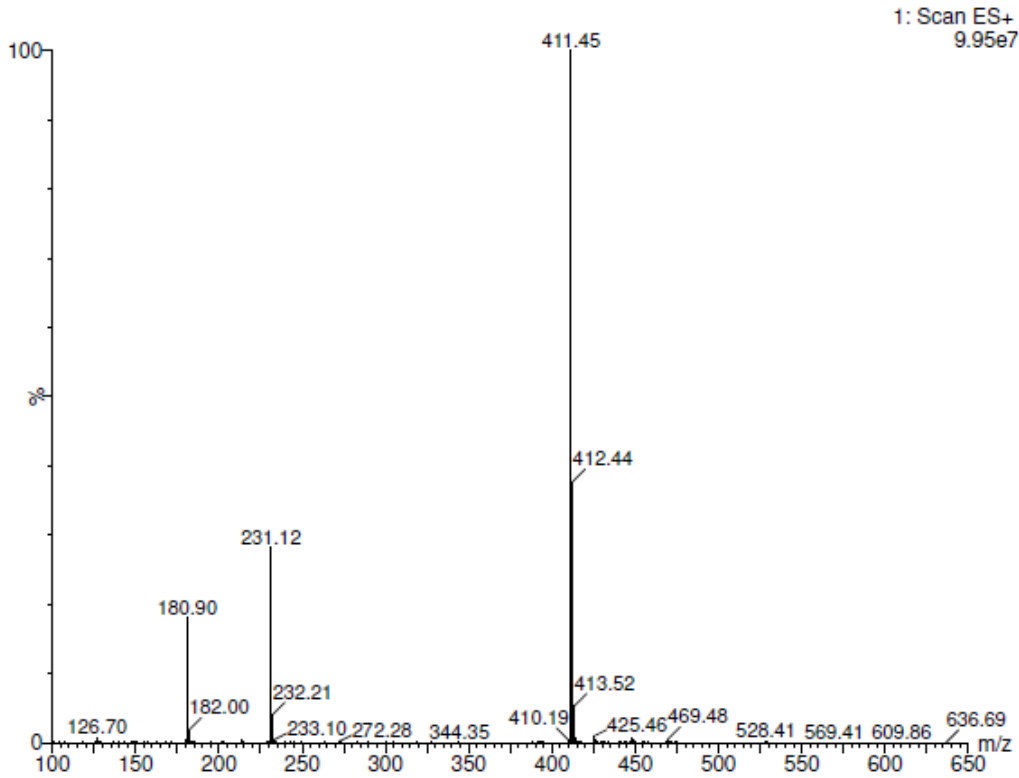

**Table S1.** Retention times and UPLC analytical method of the final compounds.<sup>a</sup>

| <b>Compound</b> | <b>Rt (min)</b> | <b>Method</b> | <b>Compound</b> | <b>Rt (min)</b> | <b>Method</b> |
|-----------------|-----------------|---------------|-----------------|-----------------|---------------|
| <b>3</b>        | 3.80            | <i>E</i>      | <b>15</b>       | 2.79            | <i>E</i>      |
| <b>4</b>        | 4.60            | <i>E</i>      | <b>16</b>       | 3.80            | <i>E</i>      |
| <b>5</b>        | 2.63            | <i>E</i>      | <b>17</b>       | 2.85            | <i>E</i>      |
| <b>6</b>        | 3.66            | <i>E</i>      | <b>18</b>       | 2.72            | <i>E</i>      |
| <b>7</b>        | 3.65            | <i>E</i>      | <b>19</b>       | 4.63            | <i>E</i>      |
| <b>8</b>        | 2.87            | <i>E</i>      | <b>20</b>       | 2.30            | <i>E</i>      |
| <b>9</b>        | 2.96            | <i>E</i>      | <b>21</b>       | 3.31            | <i>E</i>      |
| <b>10</b>       | 2.22            | <i>E</i>      | <b>22</b>       | 2.74            | <i>E</i>      |
| <b>11</b>       | 3.31            | <i>E</i>      | <b>23</b>       | 4.04            | <i>E</i>      |
| <b>12</b>       | 2.49            | <i>E</i>      | <b>24</b>       | 3.17            | <i>E</i>      |
| <b>13</b>       | 3.70            | <i>E</i>      | <b>25</b>       | 3.56            | <i>E</i>      |
| <b>14</b>       | 3.48            | <i>E</i>      | <b>26</b>       | 4.00            | <i>E</i>      |

<sup>a</sup>Freshly prepared 10 mM DMSO-*d*<sub>6</sub> stock solutions (used for biological screenings), diluted 20-fold or 100 fold in CH<sub>3</sub>CN/H<sub>2</sub>O (1:1), and directly analyzed. The analysis was performed on an ACQUITY UPLC BEH C18 column (100x2.1mmID, particle size: 1.7μm) with a VanGuard BEH C18 pre-column (5x2.1mmID, particle size: 1.7μm) at 40 °C using 10mM NH<sub>4</sub>OAc in H<sub>2</sub>O at pH 5 adjusted with AcOH (A) and 10mM NH<sub>4</sub>OAc in CH<sub>3</sub>CN-H<sub>2</sub>O (95:5) at pH 5 (B) as mobile phase at 0.5mL/min. *Method E*: gradient 10 to 90% B over 6.0 min. Flow rate 0.5 mL min<sup>-1</sup>. Temperature 40 °C. The detection wavelength (λ) was set at 215 nm for relative purity determination.

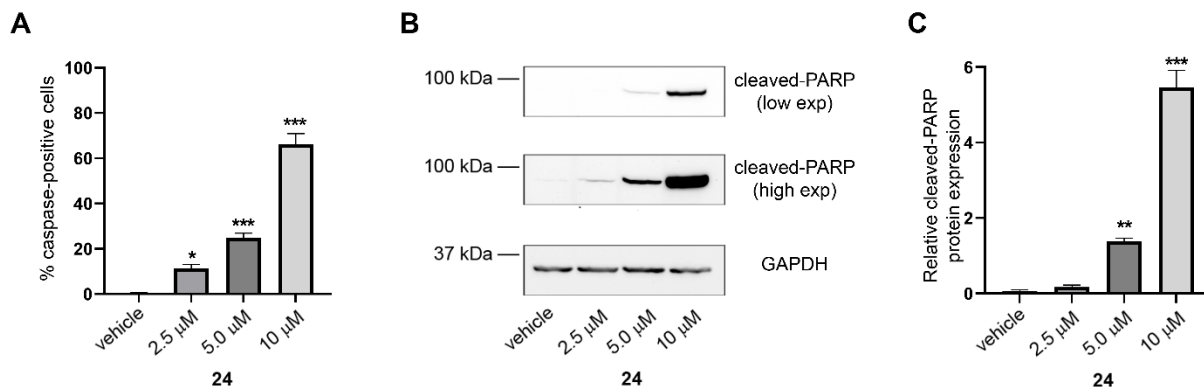

**Figure S1.** Compound **24** induces apoptosis in BT-474 cells. (A) BT-474 cells were treated with the indicated concentrations of **24** or DMSO (vehicle). After 24 h, caspase activity was evaluated with a fluorescent inhibitor of caspases covalently bound to the poly-caspase-specific amino acid sequence valine-alanine-aspartic acid (VAD) (SR-VAD-FMK). Count of the percentage of caspase-positive cells is given as mean  $\pm$  SEM,  $n=3$ . \* $P<0.05$  and \*\*\* $P<0.001$ , (one-way ANOVA with Dunnett's multiple comparison test). (B) Protein samples from BT-474 cells treated as in A were probed with specific antibodies against cleaved-PARP (cleaved-PARP) and GAPDH proteins. (C) Quantification of immunoblot analysis from protein samples treated as in B. Relative cleaved PARP expression was calculated normalizing the optical density of cleaved-PARP signals with that of GAPDH. Shown as mean  $\pm$  SEM,  $n=3$ . \*\* $P<0.01$  and \*\*\* $P<0.01$  (one-way ANOVA with Dunnett's multiple comparison test).

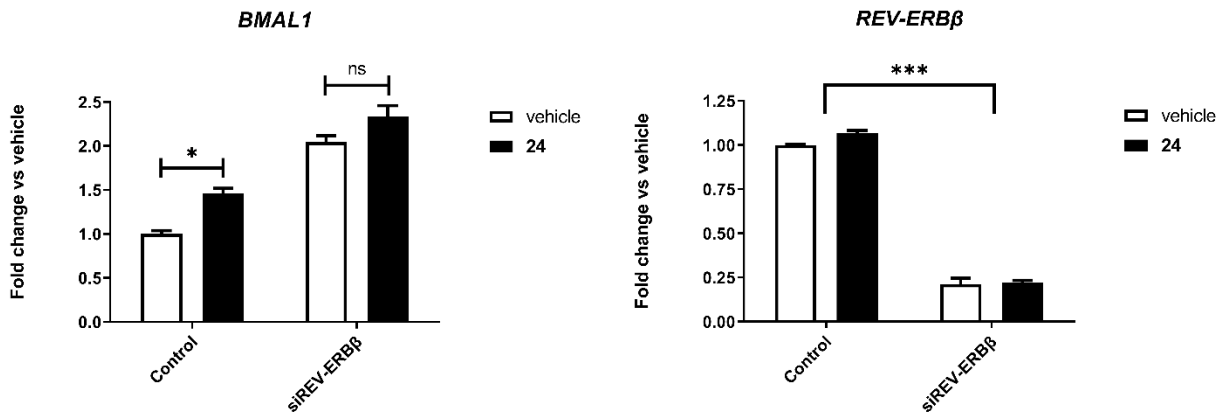

**Figure S2.** REV-ERB $\beta$  silencing abolishes compound **24**-mediated transcriptional response. BT-474 cells were transfected with pooled siRNA sequences against *REV-ERB $\beta$*  (siREV-ERB $\beta$ ) or a non-targeting pool as a control (Control). One day post transfection, cells were treated with DMSO (vehicle) or 5  $\mu$ M of compound **24** for 24 h and the expression of the REV-ERB target gene, *BMAL1*, and *REV-ERB $\beta$*  was determined by quantitative reverse transcriptase-PCR (qRT-PCR) using *GAPDH* for normalization. Shown as mean  $\pm$  SEM, n = 3. \*P<0.05, **24**-treated versus vehicle treated control cells; \*\*\*P<0.001, **24**- and vehicle-treated siREV-ERB $\beta$  versus **24**- and vehicle-treated control cells (two-way ANOVA with Bonferroni's posttest analysis).

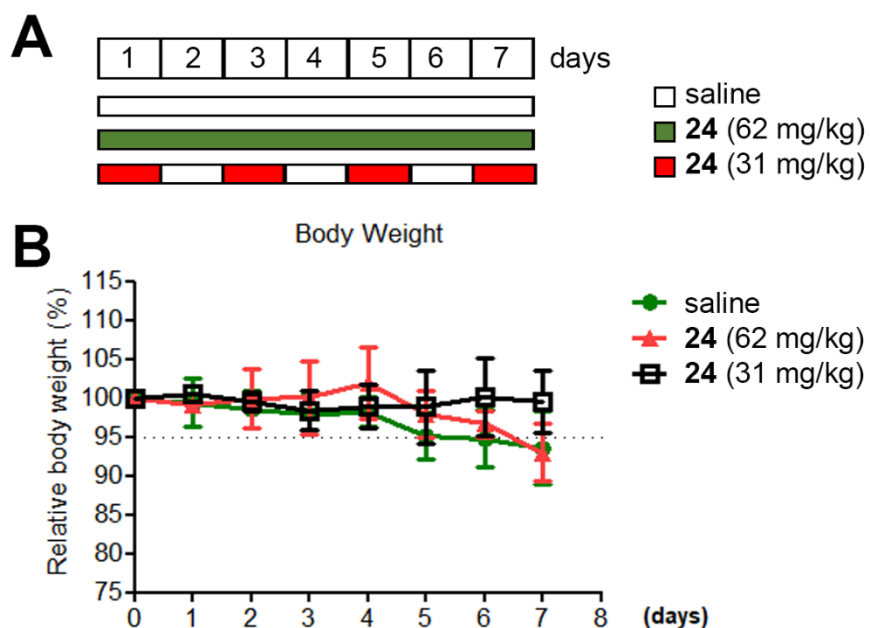

**Figure S3.** Tolerability of **24** in CD1 mice. (A) Female CD1 mice were treated with i.p. injections of **24** administered according to the schematized schedule treatments. (B) Animal body weight was monitored daily over a 7-day period. Weight of mice the day before starting the treatment was set as 100% and used for calculating the relative body weight (%) and is shown as mean  $\pm$  SEM,  $n = 3$  mice per each treatment group.
